# The RINGO2 and DIPOL optical polarization catalogue of blazars

H. Jermak,<sup>1</sup>★ I. A. Steele,<sup>1</sup> E. Lindfors,<sup>2</sup> T. Hovatta,<sup>3,4</sup> K. Nilsson,<sup>5</sup> G. P. Lamb,<sup>1</sup> C. Mundell,<sup>6</sup> U. Barres de Almeida,<sup>7</sup> A. Berdyugin,<sup>2</sup> V. Kadenius,<sup>2</sup> R. Reinthal<sup>2</sup> and L. Takalo<sup>2</sup>

<sup>1</sup>*Astrophysics Research Institute, Liverpool John Moores University, Brownlow Hill, Liverpool, L3 5RF, UK*

<sup>2</sup>*Tuorla Observatory, Department of Physics and Astronomy, University of Turku, Väisäläntie 20, 21500 Piikkiö, Finland*

<sup>3</sup>*Aalto University Metsähovi Radio Observatory, Metsähovintie 114, FI-02540 Kylmälä, Finland*

<sup>4</sup>*Aalto University Department of Radio Science and Engineering, PO BOX 13000, FI-00076 AALTO, Finland*

<sup>5</sup>*Finnish Center for Astrophysics with ESO, University of Turku, Väisäläntie 20, 21500 Piikkiö, Finland*

<sup>6</sup>*Department of Physics, Bath University, Bath, BA2 7AY, UK*

<sup>7</sup>*Centro Brasileiro de Pesquisas Físicas, Rua Dr. Xavier Sigaud 150, Urca, Rio de Janeiro, RJ 22290-160, Brazil*

Accepted 2016 July 19. Received 2016 June 17; in original form 2016 February 5

## ABSTRACT

We present  $\sim 2000$  polarimetric and  $\sim 3000$  photometric observations of 15  $\gamma$ -ray bright blazars over a period of 936 days (2008-10-11 to 2012-10-26) using data from the Tuorla blazar monitoring program (KVA DIPOL) and Liverpool Telescope (LT) RINGO2 polarimeters (supplemented with data from SkyCamZ (LT) and *Fermi*-LAT  $\gamma$ -ray data). In 11 out of 15 sources we identify a total of 19 electric vector position angle (EVPA) rotations and 95 flaring episodes. We group the sources into subclasses based on their broad-band spectral characteristics and compare their observed optical and  $\gamma$ -ray properties. We find that (1) the optical magnitude and  $\gamma$ -ray flux are positively correlated, (2) EVPA rotations can occur in any blazar subclass, four sources show rotations that go in one direction and immediately rotate back, (3) we see no difference in the  $\gamma$ -ray flaring rates in the sample; flares can occur during and outside of rotations with no preference for this behaviour, (4) the average degree of polarization (DoP), optical magnitude and  $\gamma$ -ray flux are lower during an EVPA rotation compared with during non-rotation and the distribution of the DoP during EVPA rotations is not drawn from the same parent sample as the distribution outside rotations, (5) the number of observed flaring events and optical polarization rotations are correlated, however we find no strong evidence for a temporal association between individual flares and rotations and (6) the maximum observed DoP increases from  $\sim 10$  per cent to  $\sim 30$  per cent to  $\sim 40$  per cent for subclasses with synchrotron peaks at high, intermediate and low frequencies, respectively.

**Key words:** polarization – instrumentation: polarimeters – galaxies: active – galaxies: jets – gamma-rays: galaxies.

## 1 INTRODUCTION

The centre of most, if not all galaxies, contains at least one supermassive black hole (Kormendy & Richstone 1995; Magorrian et al. 1998). If the matter in the vicinity of the compact object is close enough to become accreted on to the compact object then it is classified as an active galactic nucleus (AGN). The viewing angle of an AGN often determines its observational classification. Those AGN viewed within a small opening angle of the jet axis are classified as blazars (Urry & Padovani 1995). Blazars are defined by rapid flux variability with large amplitudes, high apparent lu-

minosities, greater brightness temperatures than typical AGN, high polarization and superluminal motion of ejected components in the jet. The apparent superluminal properties are caused by the relativistic beaming of the jet emission towards the observer (Blandford & Rees 1978).

Questions of the formation, collimation and acceleration of blazar jets from the regions close to the supermassive black hole are still unsolved, however progress can be made by exploring the signatures of the magnetic field in polarized light. Using the linear Stokes Parameters to calculate the angle and degree of polarization we can explore how the optical synchrotron emission evolves during a  $\gamma$ -ray flare and whether rotations in the electric vector position angle (EVPA) correspond with low- or high-states in the optical and  $\gamma$ -ray emission. Changes in the EVPA and the degree of polarization can

\*E-mail: [h.e.jermak@2012.ljmu.ac.uk](mailto:h.e.jermak@2012.ljmu.ac.uk)

afford information about the structure and order of the underlying magnetic field (Kikuchi et al. 1988).

Blazars are the most energetic of the AGN classes and have characteristic ‘double-humped’ spectral energy distributions (SEDs) that span the entire electromagnetic spectrum. The first hump, peaking in the infrared–optical is attributed to synchrotron emission, whereas the higher energy peak (X-ray to  $\gamma$ -ray) is thought to be produced by inverse- or synchrotron self-Compton scattering of jet or external photons. Blazars can be subdivided according to the location of the synchrotron emission peak in their SED. Flat spectrum radio quasars (those sources originally identified to have optical emission line equivalent widths  $\geq 5\text{\AA}$ ) are included with BL Lac objects that have SED synchrotron peaks at low-frequencies (low-synchrotron-peaked LSP) ( $\nu < 10^{14}$  Hz (IR),  $\lambda \gtrsim 30\,000$  Å). The intermediate synchrotron peaked sources (ISPs) and high synchrotron peaked sources (HSPs) are all BL Lac objects and have synchrotron peaks between  $10^{14} \leq \nu \leq 10^{15}$  Hz (optical/IR,  $\lambda \sim 3000\text{--}30\,000$  Å) and  $\geq 10^{15}$  Hz (UV,  $\lambda \lesssim 3000$  Å), respectively (Abdo et al. 2010b).

Due to the variability of blazars, the subclass of FSRQ/BL Lac is a loose one. The optical emission spectrum of a source has been shown to vary between the two classes depending on the activity state of the source (e.g. Ghisellini et al. 2011). For this reason in this comparison we mainly focus on studying the blazar subclasses according to the literature location in the SED of their synchrotron peak. With the peak being directly related to the energy distribution of the electrons within the jet this classification allows the analysis of sources which may have different high energy emission processes.

The high energy component of the SED can be explained by synchrotron self-Compton (SSC) emission (Marscher & Gear 1985; Maraschi, Ghisellini & Celotti 1992; Bloom & Marscher 1996; Tavecchio, Maraschi & Ghisellini 1998), a combination of leptonic SSC and hadronic synchrotron emission (e.g. Mannheim & Biermann 1992; Mücke & Protheroe 2001; Böttcher, Reimer & Zhang 2013), synchrotron emission of leptons produced in a hadronic cascade via proton–photon collisions above the pion production energy (e.g. Mannheim & Biermann 1992; Aharonian 2000; Mücke & Protheroe 2001; Mücke et al. 2003; Böttcher et al. 2013), or external Compton (EC) of soft seed photons from a variety of sources such as: accretion disc radiation (Dermer, Schlickeiser & Mastichiadis 1992; Dermer & Schlickeiser 1993); optical and ultraviolet emission from the circumnuclear material (Sikora, Begelman & Rees 1994; Blandford & Levinson 1995; Ghisellini & Madau 1996; Dermer, Sturmer & Schlickeiser 1997); infrared emission from the dusty torus (Błażejowski et al. 2000); or synchrotron emission from other jet regions (Georganopoulos & Kazanas 2003; Ghisellini & Tavecchio 2008).

Some proposed causes of polarization angle rotations within blazar jets are emission features or shocks travelling along helical paths or magnetic field lines (e.g. Marscher et al. 2008, 2010; Zhang, Chen & Böttcher 2014, a turbulent magnetic field resulting in the random walk of the polarization vector (Jones et al. 1985; Marscher 2014). Visual rather than physical effects such as a bent jet and the trajectory of the polarization angle on the sky can also cause polarization angle rotations (Abdo et al. 2010a). Young (2010) graphically presents the idea shown by Björnsson (1982) that other kinematic effects causing variations of the viewing angle in the comoving frame could explain EVPA rotations up to  $180^\circ$ . Nalewajko (2010) continues with this idea and suggests that a symmetric emitting region on a bent jet could produce a gradual EVPA rotation.

In this paper we present the results of a polarimetric and photometric campaign on a sample of 15 blazars and present the corre-

lations between these data and *Fermi*  $\gamma$ -ray data. We also explore the relationship between  $\gamma$ -ray flares and polarization angle rotations. In Section 2 we present the photometric and polarimetric data analysis procedures and the definitions of  $\gamma$ -ray flares and EVPA rotations used in this analysis. In Section 3 we detail the sample and the historical behaviour of the blazars. In Section 4 we discuss the results of the correlation analysis and the differences between blazar subclasses according to the location of the synchrotron peak in the SEDs. In Section 5 we present and discuss our findings from the analysis. In the appendix we present the light curves of each of the sources in this sample. The data presented in the publication will be made available via the VizieR source.<sup>1</sup>

## 2 OBSERVATIONS

The polarization monitoring program with RINGO2 is a continuation of a program that was running at the KVA-60 telescope in 2009–2011. The KVA-60 telescope is used for optical support observations of the MAGIC telescopes and has a relatively small mirror diameter of 60 cm. The source sample originally consisted of eight  $\gamma$ -ray bright blazars that had an optical magnitude of  $R < 16$  and were known to show strong (>5 per cent) polarization: 3C 66A, S5 0716+714, OJ 287, ON 231, 3C 279, PKS 1510-089, PG 1553+113 and BL Lac. For these eight sources we have the longest polarization light curves. When the monitoring with RINGO2 started in 2010, the sample was gradually expanded with AGN the MAGIC Cherenkov telescope (Lorenz & Martinez 2005) has been following: which were Mrk 421, Mrk 501 (long-term monitoring programs), 1ES 1011+496, PKS 1222+216, Mrk 180 (short-term multi-wavelength campaigns and target of opportunity observations). See Table 1 for the full sample of 15 sources.

### 2.1 Photometry

#### 2.1.1 KVA 35 cm

The KVA telescope, operated remotely from Finland, consists of two tubes; 35 cm and 60 cm. The KVA 35 cm is used for the *R*-band photometric observations of the Tuorla blazar monitoring program.<sup>2</sup> The observations are coordinated with the MAGIC Imaging Air Cherenkov Telescope and while the monitoring observations are typically performed two to three times a week (the weather allowing), during MAGIC observations the sources are observed every night. The data are analysed using standard aperture photometry procedures with the semi-automatic pipeline developed in Tuorla by KN. The pipeline presents the user with a graphical image of each frame to allow the rapid identification of the target object and comparison stars. The magnitudes are measured using the differential photometry and comparison star magnitudes found in the footnotes<sup>1,2</sup>. The magnitudes are converted into Janskys using the standard formula  $S = 3080 \times 10^{-(\text{mag}/2.5)}$ . For most of the sources, the contribution of the host galaxy to the measured flux is insignificant, the exceptions being Mrk 421 and Mrk 501. If the host galaxy has been detected, its contribution has been subtracted from the measured fluxes (Nilsson et al. 2008). Finally, the measured fluxes were corrected for the galactic absorption using the values from NED.<sup>3</sup>

<sup>1</sup> <http://vizier.u-strasbg.fr/viz-bin/VizieR>

<sup>2</sup> <http://users.utu.fi/kani/1m>

<sup>3</sup> <http://ned.ipac.caltech.edu>

**Table 1.** The full RINGO2 catalogue with redshift, source type,  $R$ -band magnitude range, polarization range, *Fermi* range, observation period information and details of absent/unavailable data (see Section 2.1.4). References for the redshift values can be found in Section 3.

| Name                | $z$   | Type | $R$ mag. range | Pol. range<br>(per cent) | <i>Fermi</i> range<br>( $\text{ph cm}^{-2} \text{s}^{-1}$ ) | Observation Period<br>(MJD) | Absent data              |
|---------------------|-------|------|----------------|--------------------------|-------------------------------------------------------------|-----------------------------|--------------------------|
| <b>3C 66A</b>       | 0.444 | ISP  | 15.1–13.2      | 1.0–27.7                 | $4.0 \times 10^{-8}$ – $1.1 \times 10^{-6}$                 | 55413.17–56226.03           | ...                      |
| <b>S5 0716+714</b>  | 0.31  | ISP  | 14.4–12.2      | 0.3–23.7                 | $6.4 \times 10^{-8}$ – $1.3 \times 10^{-6}$                 | 55651.86–56035.00           | ...                      |
| <b>OJ 287</b>       | 0.306 | LSP  | 15.4–13.5      | 4.5–38.7                 | $2.8 \times 10^{-8}$ – $1.4 \times 10^{-6}$                 | 55641.91–56223.22           | ...                      |
| <b>1ES 1011+496</b> | 0.212 | HSP  | 15.6–14.7      | 0.8–6.8                  | $4.2 \times 10^{-8}$ – $9.7 \times 10^{-8}$                 | 56006.93–56094.92           | KVA (pol)                |
| <b>Mrk 421</b>      | 0.031 | HSP  | 13.0–12.0      | 0.2–8.8                  | $1.0 \times 10^{-7}$ – $1.3 \times 10^{-6}$                 | 55705.90–56096.89           | RINGO2                   |
| <b>Mrk 180</b>      | 0.045 | HSP  | 15.5–15.1      | 2.5–5.1                  | ...                                                         | 56006.89–56216.24           | <i>Fermi</i> , KVA (pol) |
| <b>1ES 1218+304</b> | 0.164 | HSP  | 16.0–15.5      | 0.6–4.3                  | $1.6 \times 10^{-8}$ – $2.6 \times 10^{-8}$                 | 56065.88–56136.90           | KVA (pol)                |
| <b>ON 231</b>       | 0.102 | ISP  | 15.6–14.1      | 0.6–23.3                 | $2.3 \times 10^{-8}$ – $8.6 \times 10^{-8}$                 | 55573.26–56032.97           | ...                      |
| <b>PKS 1222+216</b> | 0.432 | LSP  | 15.8–14.7      | 0.5–9.7                  | $8.6 \times 10^{-8}$ – $1.3 \times 10^{-6}$                 | 55901.24–55935.16           | ...                      |
| <b>3C 279</b>       | 0.536 | LSP  | 17.8–14.3      | 1.3–36.0                 | $1.2 \times 10^{-7}$ – $2.7 \times 10^{-6}$                 | 55575.29–56101.94           | ...                      |
| <b>1ES 1426+428</b> | 0.129 | HSP  | 16.3–15.7      | 0.4–5.2                  | ...                                                         | 56047.00–56171.87           | <i>Fermi</i> , KVA(pol)  |
| <b>PKS 1510-089</b> | 0.36  | LSP  | 16.6–13.1      | 0.5–16.5                 | $2.6 \times 10^{-7}$ – $2.1 \times 10^{-5}$                 | 55575.30–56062.09           | ...                      |
| <b>PG 1553+113</b>  | <0.78 | HSP  | 14.0–13.1      | 0.2–9.1                  | $4.2 \times 10^{-8}$ – $1.0 \times 10^{-7}$                 | 56007.13–56171.87           | ...                      |
| <b>Mrk 501</b>      | 0.034 | HSP  | 13.3–12.5      | 0.8–6.6                  | $3.9 \times 10^{-8}$ – $1.4 \times 10^{-7}$                 | 55660.04–56136.89           | KVA (pol)                |
| <b>BL Lac</b>       | 0.069 | ISP  | 15.0–12.7      | 1.2–27.3                 | $10.0 \times 10^{-8}$ – $1.5 \times 10^{-6}$                | 55413.11–56225.94           | ...                      |

While for many of the sources there is  $>10$  yr of data, in this paper, we only use the data that is from the same observing periods as our DIPOL and RINGO2 polarization measurements.

### 2.1.2 RINGO2

RINGO2 was a fast-readout imaging polarimeter with a  $V+R$  hybrid filter (covering 460–720 nm) constructed from a 3 mm Schott GG475 filter cemented to a 2 mm KG3 filter. RINGO2 used a rapidly rotating ( $\sim 1$  revolution per second) Polaroid to modulate the incoming beam from the telescope (Steele et al. 2010). Eight equally spaced sensors around the edge of the rotating polaroid triggered the readout to a high speed electron-multiplying CCD. This generated a series of frames (eight per rotation) of duration  $\sim 125$  ms each. The frames were then averaged in software at matching rotation angles into a set of eight images per observation. By this process the degree and angle of polarization were encoded within the variation of the signal between the eight images (Clarke & Neumayer 2002). Data reduction was therefore a process of relative aperture photometry on these eight images followed by the correction of the measured counts for instrumental polarization and depolarization based on the long-term average properties of the nightly standard star observations.

Sky-subtracted target counts were measured in each image using aperture photometry. The associated error was computed by quadrature combination of the photon noise of the target, the sky noise in the aperture and error in sky determination. The photon noise was calculated according to an effective gain, that is, taking into consideration the multiple frames averaged to make a single image and the effect of multiplication noise in the electron multiplying charge coupled device (EMCCD; Robbins & Hadwen 2003). The sky noise takes into account the number of pixels in the aperture and the sigma-cleaned standard deviation of sky annulus pixels. The sky error was calculated according to the number of pixels in the sky annulus.

RINGO2 produced eight images, one for each of its Polaroid rotor positions. In order to obtain photometry measurements of these polarimetry data, the eight rotor positions for a given observation were stacked using the IMCOMBINE command in IRAF. Automated relative aperture photometry was then performed on these frames using Source Extractor (Bertin & Arnouts 1996) and the source was

identified by locating the closest lying source to the right ascension and declination values.

The reference magnitudes for the secondary stars were found in the USNO-B catalogue (Monet et al. 2003) and where they were not available the magnitude value was offset at overlapping time periods to match the KVA data (which have a larger field of view so more choice of secondary stars). The magnitude was also converted into Janskys using the standard formula shown in Section 2.1.1.

Full details of the Ringo2 and Ringo3 reduction pipeline can be found in Jermak (2016).

For Mrk 421 there were no usable secondary sources in the frame so magnitude calibration was not possible using the RINGO2 frames. SkyCamZ data were used instead.

### 2.1.3 SkyCamZ

The SkyCamZ camera consists of a 200 mm diameter telescope that parallel points with the Liverpool Telescope in order to provide photometric monitoring during observations with other instruments and also carry out a synchronous variability survey of the northern sky. The Z denotes a ‘zoomed’ field-of-view ( $1^\circ$ ) and the instrument can detect sources down to  $\sim 16$  mag. When the enclosure is open, the camera takes a 10 s exposure automatically once per minute. All data are automatically dark subtracted, flat-fielded and fitted with a world coordinate system (WCS) by the STILT pipeline (Mawson, Steele & Smith 2013). The data are then introduced to the same pipeline used to reduce the RINGO2 data (see Section 2.1.2). The pipeline runs source extractor on the data and using a pre-identified secondary star (with its literature magnitude coming from the USNO-B1 catalogue) performs differential photometry.

### 2.1.4 Fermi

*Fermi*-LAT (Large Area Telescope) is a space-based pair production telescope with an effective area of  $6500 \text{ cm}^2$  on axis for  $>1$  GeV photons. It is sensitive to  $\gamma$ -rays with energies in the range of 20 MeV to above 300 GeV (Atwood et al. 2009). To produce the *Fermi*-LAT light curves the reprocessed Pass 7 data was downloaded and analysed using the ScienceTools version v9r32p5. In the event selection the LAT team recommendations were followed for

Pass 7 data.<sup>4</sup> We modelled a 15° region around each source using the instrument response function P7REP\_SOURCE\_V15, Galactic diffuse model gll\_iem\_v05\_rev1, and isotropic background model iso\_source\_v05.

The light curves were binned using an adaptive binning method (Lott et al. 2012), with estimated 15 per cent statistical flux uncertainty in each bin. The flux in each bin was then estimated using the unbinned likelihood analysis and the tool *gtlike*. All sources within 15° of the target that are listed in the 2FGL catalogue (Nolan et al. 2012) were included in the likelihood model. The spectral index of all sources are frozen to the values reported in 2FGL, and for sources more than 10° from the target also fluxes are frozen to the 2FGL values. The sources Mrk 180 and 1ES1426+428 are too faint to produce adequate *Fermi* light curves for this analysis as the bin sizes would be too large.

## 2.2 Optical polarimetry

### 2.2.1 DIPOL at KVA-60

The KVA polarization monitoring program began in 2008 December using the Kungliga Vetenskapsakademien (KVA) telescope located on the Canary Island of La Palma. The KVA telescope consists of two telescopes; a 35 cm Celestron and a 60 cm Schmidt reflector. The larger of the two, DIPOL, a 60 cm reflector, is equipped with a CCD polarimeter capable of polarimetric measurements in *BVRI* bands using a plane-parallel calcite plate and a super-achromatic  $\lambda/2$  retarder (Pirola et al. 2005).

The observations typically took place 1–2 times a week. The typical observation time per source was 960 s and the observations were performed without a filter to improve the signal to noise. There are several gaps in the cadence when the source has been too faint ( $R > 15$ ) and/or too weakly polarized (1–2 per cent) to be detectable with KVA. In total, 10 to  $\sim 100$  polarization measurements per source were collected. During some of the nights, polarized standard stars from Turnshek et al. (1990) were observed to determine the zero-point of the position angle. The instrumental polarization of the telescope has been found to be negligible.

The data analysis is performed following the standard aperture photometry procedures with the semi-automatic software that has been developed for monitoring purposes. The sky-subtracted target counts were measured in the ordinary and extraordinary beams using aperture photometry. The normalized Stokes parameters and the degree of polarization and position angle were calculated from the intensity ratios of two beams using standard formula (e.g. Landi Degl’Innocenti, Bagnulo & Fossati 2007).

### 2.2.2 RINGO2

Optical polarimetry was obtained using the novel RINGO2 fast-readout imaging polarimeter (Steele et al. 2010) on the Liverpool Telescope (LT) (see Section 2.1.2). RINGO2 was mounted on the telescope in the period 2010 August 1 to 2012 October 26. During this period observations were obtained of the blazar sample with a typical cadence of  $\sim 3$  nights whenever the source was observable from La Palma. Nightly observations were also obtained of polarized and non-polarized standards drawn from the catalogue of Schmidt, Elston & Lupie (1992). Occasional more intensive

(nightly) periods of observation were made of particular blazars when sources were in a high  $\gamma$  ray state.

The measured target counts were then corrected for instrumental polarization by division by the corresponding mean value of the counts for the same Polaroid angle measured from all of the zero-polarized standard star observations (averaging over a period of time within which the polarimeter has not been removed from the telescope or altered). These corrected target counts and errors were then combined using the equations presented by Clarke & Neumayer (2002) to calculate  $q$ ,  $u$  and their associated errors by standard error propagation. Analysis of the scatter in the  $q$ ,  $u$  polarization values derived from the zero-polarized standards allowed us to estimate the stability of that correction as having an associated  $q$  and  $u$  errors of 0.25 per cent, which we therefore combined in quadrature to our final error estimate. Next we combine  $q$  and  $u$  to estimate an initial value of degree of polarization ( $p$ ):

$$p = \sqrt{q^2 + u^2}. \quad (1)$$

This measured value was then corrected for an instrumental depolarization factor  $0.76 \pm 0.01$  (Arnold, private communication) which was found by plotting the measured polarized standards against their catalogue values. The depolarization error is propagated into the degree of polarization error.

For PKS 1510-089 we used averaged data to account for the large scatter in the data points. The data were averaged over 5-d bins; within each bin we computed average  $q = Q/I$  and  $u = U/I$  values and corresponding root mean squared errors.

### 2.2.3 Polarimetric error analysis

For both the DIPOL and RINGO2 polarimetric data, to correct  $p$  for the statistical bias associated with calculating errors from square roots (where positive and negative  $q$  and  $u$  values are possible but only positive  $p$  values can result) we used the methodology presented by Simmons & Stewart (1985) to calculate 67 per cent confidence limits and the most likely  $p$  value. As a check on this procedure we also ran a Monte Carlo simulation taking as input Gaussian distributions of  $q$  and  $u$  values with standard deviations equal to their calculated errors and examined the resulting distribution of  $p$ . The results were identical.

The EVPA in degrees was calculated as

$$\text{EVPA} = 0.5 \text{atan2}(u, q) + \text{ROTSKYANGLE} + \text{PA}_0 \quad (2)$$

where the function  $\text{atan2}(u, q)$  calculates the arctangent of  $u/q$  with a correct calculation of the sign and returns an angle between  $-180^\circ$  and  $180^\circ$ ,  $\text{ROTSKYANGLE}$  is the angle of the telescope mount with respect to the sky when the image was taken and  $\text{PA}_0$  is a calibration constant derived from repeated measurements of the EVPA of the polarized standard stars. Errors on EVPA were calculated according to the prescription in Naghizadeh-Khouei & Clarke (1993), and again confirmed by Monte Carlo simulation.

## 2.3 Identification of flares and rotations

There are no exact definitions of what consists of a flare or a flaring period. By eye it is possible to identify data points that appear to be flaring however producing a sample wide condition that selects these points is difficult. It is not possible to assign a single level of quiescence above which data are considered to be flaring due to the varying baseline in  $\gamma$ -ray blazars. For clarity, we detail the conditions of the code used to identify the peak of  $\gamma$ -ray flaring

<sup>4</sup> [http://fermi.gsfc.nasa.gov/ssc/data/analysis/documentation/Pass7REP\\_usage.html](http://fermi.gsfc.nasa.gov/ssc/data/analysis/documentation/Pass7REP_usage.html)

**Table 2.** Tabulated data of the upwards and downwards EVPA rotations and  $\gamma$ -ray flares for different blazar subclasses for the 11 sources that have EVPA rotation/ $\gamma$ -ray flare events. Also included are the length of the *Fermi* monitoring period in days, the maximum degree of polarization, the flare rate (and mean flare rate), days between rotations and flares (and mean of this value) and number of flares during a rotation.

| Source       | Rot $\uparrow$<br>(anti-c-wise) | Rot $\downarrow$<br>(c-wise) | Flares | Type       | <i>Fermi</i> mon.<br>period (days) | Max.<br>deg. | Flare rate<br>flares/days (yr) | Days between<br>rot and flare      | Flares<br>during rot |
|--------------|---------------------------------|------------------------------|--------|------------|------------------------------------|--------------|--------------------------------|------------------------------------|----------------------|
| 3C 66A       | 1                               | 0                            | 10     | ISP        | 1323                               | 27.7         | 0.0076 (2.76)                  | 20                                 | 0                    |
| S5 0716+714  | 2                               | 2                            | 16     | ISP        | 1442                               | 17.9         | 0.011 (4.05)                   | −14, 0 ( $\times 3$ )              | 3                    |
| OJ 287       | 1                               | 0                            | 3      | LSP        | 1382                               | 36.9         | 0.0022 (0.79)                  | ...                                | ...                  |
| Mrk 421      | 0                               | 1                            | 3      | HSP        | 541                                | 8.3          | 0.0055 (2.03)                  | 1                                  | 0                    |
| ON231        | 0                               | 0                            | 5      | ISP        | 1593                               | 23.3         | 0.0031 (1.15)                  | ...                                | ...                  |
| PKS 1222+216 | 0                               | 0                            | 5      | LSP (FSRQ) | 530                                | 5.4          | 0.0094 (3.45)                  | ...                                | ...                  |
| 3C 279       | 3                               | 1                            | 11     | LSP (FSRQ) | 1464                               | 29.7         | 0.0075(2.74)                   | 8, −2, 0                           | 1                    |
| PKS 1510-089 | 3                               | 1                            | 24     | LSP (FSRQ) | 1406                               | 16.4         | 0.017 (6.23)                   | −4, 21, 39, −84, 0 ( $\times 10$ ) |                      |
| PG 1553+113  | 1                               | 1                            | 5      | HSP        | 1241                               | 9.1          | 0.0040 (1.47)                  | 0                                  | 1                    |
| Mrk 501      | 0                               | 0                            | 4      | HSP        | 594                                | 6            | 0.0067 (2.46)                  | ...                                | ...                  |
| BL Lac       | 2                               | 0                            | 9      | ISP        | 1431                               | 27.3         | 0.0063 (2.30)                  | 116, −21, 0, 98                    | 1                    |

periods. It is also necessary to identify what is considered to be an EVPA rotation or swing, this is detailed in this section and follows on from definitions in other EVPA studies. A summary of the results of this analysis is presented in Table 2.

### 2.3.1 Gamma-ray flares

A blazar flare may be associated with quasi-stationary, high density regions within the jet caused by magnetic field irregularities or it may be associated with a knot or blob of emission moving along the jet (Bradt 2014). The definition of a  $\gamma$ -ray flare is complicated due to it being relative to the (varying) baseline of the  $\gamma$ -ray emission at the time prior to the flare. The method used to identify flaring events was twofold. First we establish an initial level of increased activity using a moving window which defines ‘active’ points as those which are twice the standard deviation of the five preceding points. Then for the points that meet this criterion the condition of a flare is such; active points that are greater than five times the standard deviation of the preceding five active points are considered ‘flare’. In addition, due to the nature of the moving window, for the first five points in the light curve if the flux is greater than the mean flux for the whole light curve then the points are classed as flares. Once the flare points are identified, a flare episode is defined by those flare points that are within 20 days of each other. These flaring episodes can often contain more than one peak, these are so close together that we define them as one event. The flaring episodes are represented in the light curves by vertical blue lines covering all flares within the 20 days range. For the analysis in Section 4.2, the *centre* of this flaring episode is used.

### 2.3.2 Rotations of the polarization angle

The recurrent episodes of optical EVPA rotations that are seen from AGN jets have been interpreted in a number of ways. Usually here we are referring to large-amplitude ( $>90^\circ$ ), smooth and long-lasting rotation events which seem to signal some coherent process developing within the jet. Although random walks in the Stokes plane, driven by turbulent magnetic fields, have been demonstrated to be able to explain long rotations (Jones et al. 1985; Marscher 2014), it cannot, for example, explain preferred rotation directions within some specific sources (which goes against the stochastic nature of the process). Nor (as shown via Monte Carlo simulations by Blinov et al. 2015) can they answer for an entire population of rotations observed. Other interpretations of the EVPA rotation which link

them to coherent jet features, such as (a) plasma following a helical path due to a large-scale helicoidal magnetic field configuration of the jet, resulting in long, slow rotations of the EVPA (Marscher et al. 2008, 2010; Zhang et al. 2014); (b) a bend or curvature in the jet which leads to a projection effect on the plane of the sky akin to a rotation, which can invert its rotation due to relativistic effects resulting from the collimated emission (Abdo et al. 2010a).

Since the EVPA has a  $180^\circ$  ambiguity, long gaps in the polarization light curves can lead to confusion when interpreting the EVPA rotations. To avoid introducing an incoherent view to the process with random  $180^\circ$  jumps being added to the EVPA data set, we chose to interpret the observed EVPA light curves following a continuity hypothesis. We assume that variations proceed in the smoothest way possible with no sudden jumps. Although there is no predefined limit to the length of gaps in the data, we decide to apply correction only when the difference between consecutive data points is  $<30$  days. In this work we define an EVPA rotation so that are results are consistent with those of the RoboPol group (Blinov et al. 2015), therefore an EVPA rotation is ‘any continuous change of the EVPA curve with a total amplitude of  $\Delta\theta_{\max} > 90^\circ$ , which is comprised of at least four measurements with significant swings between them’.

## 3 DESCRIPTION OF DATA

The flexibility of monitoring with a robotic telescope such as the Liverpool Telescope allows the user to increase monitoring of a particular source if its activity is deemed interesting. The main sample of blazars was added to over the period of the RINGO2 observations according to reported flaring and thus some sources have more seasons and more data than others. The multi-wavelength light curves of the individual sources in this sample can be found in the appendix Figs A1–A15.

### 3.1 3C 66A

3C 66A is a well-known BL Lac at redshift  $z=0.3347$  (Furniss et al. 2013). The blazar is a bright source of HE (Acciari et al. 2009) and very high energy (VHE)  $\gamma$ -rays ( $E > 100$  GeV) (Acciari et al. 2009; Aliu et al. 2009). There are many polarimetric monitoring observations of this source (e.g. Takalo & Sillanpaa 1993 and references therein). In these data the polarization degree is always high, typically between 10 and 20 per cent with the maximum value measured 33 per cent. In the historical data the EVPA is significantly

variable but shows a preferred position angle around  $20^\circ$ – $40^\circ$ , which is perpendicular to the direction of the VLBA jet. Ikejiri et al. (2011) and Itoh et al. (2013) also report a rotation of EVPA of  $>180^\circ$  (at MJD $\sim$ 54840, 2014 early January) and a significant negative correlation of the flux and polarization degree. Itoh et al. (2013) separate their  $\sim$ 2 yr worth of data into four sections according to the optical flux and polarization degree. Our program does not cover their first and second periods.

During the first season our polarization data show similar behaviour to that in Itoh in the period spanning 2009 August to November (MJD 55048–55150). We see a  $\sim$ 180° rotation of the EVPA, however, during 2009 November to 2010 January (MJD 55151 to 55220) our data appear to show another 180° rotation (see Table 2 and Fig. A1 in the appendix). The nature of the  $\pm$ 180° ambiguity and the smooth rotation selection of the EVPA data means that the absence of even one data point can be the difference between a rotation (our data) or a slight peak (fig. 4 in Itoh et al. 2013). However we have combined our data with that of Itoh (private communication) and we see the combined data suggest a rotation. Itoh et al. (2013) describe a polarization degree which is systematically different among the four periods due to a long-term slow change. We continue to see this behaviour in our data beyond their fourth period. The source enters a relatively quiescent phase after 2010 late July (MJD $\sim$ 55400) and in the remaining three epochs the EVPA does not appear to rotate. The optical flux drops to  $\sim$ 14.5 in the R band and the  $\gamma$ -ray flux stays low with the exception of a small flare at MJD $\sim$ 56150 (2012 August).

### 3.2 S5 0716+714

The BL Lac object S5 0716+714 has been studied intensively at all frequencies. It has no spectroscopic redshift but constraints from intervening absorption systems give  $z < 0.322$  (95 per cent confidence level, Danforth et al. 2013) and the host galaxy detection  $z = 0.31 \pm 0.08$  (Nilsson et al. 2008). S5 0716+714 is a bright source of HE (Acciari et al. 2009) and VHE (Anderhub et al. 2009)  $\gamma$ -rays. The source is thought to be observed very close to the line of sight of the jet allowing an excellent view down the jet itself (Impey et al. 2000). There are several dedicated studies of the optical polarization behaviour of the source (Uemura et al. 2010). In the optical band the source shows extremely fast brightness and degree of polarization variations. Intra-night variability of the polarization has been reported by Impey et al. (2000) and Villforth et al. (2009) with significant variations on time-scales of 10–15 min. In our data we also see fast brightness and degree of polarization variations across the four seasons with a variation of  $\sim$ 2 mag in the optical and a range in degree of polarization of 0 to  $\sim$ 20 per cent.

Typically the source shows no correlation between optical brightness and polarization degree (Ikejiri et al. 2011) and in this work we too find no evidence of a correlation (see Table A1). S5 0716+714 also shows no apparent long-term trends and therefore it has been suggested that at all epochs there must be a number of polarization components showing variations on a small time-scale. The literature also reports rapid (6 days; Larionov et al. 2008b) and slow (400 days) rotations of the EVPA of  $>300^\circ$  (Ikejiri et al. 2011). In the historical data the range of the degree of polarization is from  $\sim$ 0–25 per cent. The interpretation of the  $\pm$ 180° ambiguity in our data indicates either the EVPA exhibits a rapid rotation of  $\sim$ 180° in 2009 March (MJD $\sim$ 54900), a long slow rotation of  $\gtrsim$ 200° in 2010 October (MJD $\sim$ 55550) and a rapid rotation of  $\sim$ 200° in 2012 March (MJD $\sim$ 56000). A rotation which changes direction mid rotation, such as the rotation in 2012 March (MJD $\sim$ 56000) may be

due to a knot of material crossing the observers line of sight (see Aleksić et al. 2014a with reference to 3C279) however, this behaviour may also be due to a random walk of the EVPA. The  $\gamma$ -ray and optical data show correlations in late 2009 and early 2011, see the Discussion for more details.

### 3.3 OJ 287

OJ 287 ( $z = 0.305$ ) is a BL Lac object and one of the most famous blazars as it hosts a supermassive *binary* black hole system at its centre (Sillanpaa et al. 1988). It is bright in HE  $\gamma$ -rays (Acciari et al. 2009) but has not been detected in VHE  $\gamma$ -rays (e.g. Seta et al. 2009). The dedicated studies of the optical polarization behaviour (D’arcangelo et al. 2009; Villforth et al. 2010; Uemura et al. 2010) have shown that there is a strong preferred position angle for the polarization which is perpendicular to the flow of the jet. The polarization is strong (maximum 35 per cent). Occasionally the EVPA also shows rapid rotations with durations of 10–25 days. This behaviour has been interpreted as a signature of two components (Holmes et al. 1984; Villforth et al. 2010), stationary polarization core and chaotic jet emission. Occasionally flares with a negative correlation between flux and polarization degree have been observed (Ikejiri et al. 2011). Our data include the period observed by Agudo et al. (2011) and we see similar behaviour of the polarization properties, particularly the rotation in 2009 April (MJD $\sim$ 54940) which displays peculiar behaviour.

With the exception of the rotation in 2009 April, the EVPA remains relatively stable throughout the next three observing seasons. The degree of polarization is high in the first and fourth seasons but drops from  $\sim$ 30 per cent to  $<5$  per cent during the second season following a  $\gamma$ -ray flare. The optical flux is variable and ranges between 13.5 and 15.5 mag.

### 3.4 1ES 1011+496

1ES 1011+496 ( $z = 0.212$ , Albert et al. 2007b) is a BL Lac object which, until its discovery in VHE  $\gamma$ -rays Albert et al. (2007a), was little studied. It is bright in HE  $\gamma$ -rays (Acciari et al. 2009) and has little optical polarization literature data. From 1987 there is one archival polarization observation (Wills, Wills & Breger 2011) which shows low polarization  $\sim$ 2 per cent and an EVPA  $\sim$ 86°. The KVA and RINGO2 data presented here (taken for multi-wavelength campaigns (Ahnen et al. 2016a; Ahnen et al. 2016b) show similar results to the archival observations. Low polarization of  $<10$  per cent and an EVPA at  $\sim$ 110°.

### 3.5 Mrk 421

Mrk 421 ( $z = 0.03$  (de Vaucouleurs et al. 1991) is a nearby BL Lac object that was the first extragalactic VHE  $\gamma$ -ray emitter to be discovered (Punch et al. 1992). Its optical polarization behaviour has been studied extensively in the past (e.g. Hagen-Thorn et al. 1983; Tosti et al. 1998b and references therein). In these data for the majority of the time the source shows rather low polarization  $<5$  per cent and a rather stable EVPA of  $\sim$ 180°. Ikejiri et al. (2011) found overall significant correlation between optical brightness and degree of polarization and during a large optical flare in the winter of 1996–1997 (MJD $\sim$ 50350 onwards) the optical degree of polarization rose to 12 per cent (Tosti et al. 1998b). Tosti et al. (1998b) reported a rotation of the position angle of  $\sim$ 90° from 1995 May to October (MJD $\sim$ 49838–49991).

The data collected with the KVA and RINGO2 from 2008–2011 (MJD 55409–56226) agree with this general behaviour, however from the beginning of 2012 (MJD~55900 onwards) the data show a strong increase in polarization degree and a  $360^\circ$  rotation of the position angle, along with a steady increase in the optical magnitude. This behaviour precedes an unprecedentedly large  $\gamma$ -ray flare which occurs after 2012 June (MJD~56100) and unfortunately is not accompanied by optical data due to the source’s visibility.

### 3.6 Mrk 180

Mrk 180 ( $z = 0.045$  (Falco et al. 1999)) is a nearby BL Lac object that was detected in VHE  $\gamma$ -rays in 2006 (MJD~53795) (Albert et al. 2006b). The source has a bright host galaxy and is little studied in optical polarimetry. Marcha et al. (1996) presented an optical degree of polarization measurement of 2.4 per cent which is consistent with the results we see from early 2012 (MJD~56000) when our observations begin. The RINGO2 data were taken as part of a multi-wavelength campaign which was started in 2008 (MJD~54500) (Rügamer et al. 2011). We have few data points for the RINGO2 period of observation, polarimetry from the KVA is unavailable as are *Fermi* flux data. Our monitoring continues with the third generation polarimeter RINGO3 (Arnold et al. 2012). We find a stable EVPA of  $\sim 40^\circ$  and an *R*-band magnitude of  $\sim 14.4$ .

### 3.7 1ES 1218+304

1ES 1218+304 is a BL Lac source at  $z = 0.162$  (Adelman-McCarthy et al. 2009). It is a source of HE and VHE (Albert et al. 2006a)  $\gamma$ -rays. Its optical flux has varied over the last  $\sim 10$  yr from 15.2 to 16.4 mag in the *R* band (from Tuorla blazar monitoring campaign [see footnote 1]). There are very few polarization measurements in the literature, Jannuzi, Smith & Elston (1994) report a degree of polarization of  $\sim 5$  per cent. We present KVA (photometry only) and RINGO2 (polarimetry and photometry) data from 2012 March (MJD~55987) until the end of the program, the source does not show any flares or rotations.

### 3.8 ON 231

ON 231, also commonly known as W Comae, ( $z = 0.102$ ; Weistrop et al. 1985) is an HE and VHE  $\gamma$ -ray bright BL Lac object (Acciari et al. 2008, 2009). Observations taken in 1981–1982 (MJD~45000) and 1991–1992 (MJD~48500) cover similar ranges with a polarization degree ranging from 5.2 to 19.2 per cent and an EVPA of  $50:0\text{--}93:3$  (Wills et al. 2011). The source underwent three major outbursts in 1995 March (MJD  $\sim 49800$ ), 1996 February (MJD~50120) and 1997 January (MJD~50450) (Tosti et al. 1998a) and a more energetic outburst in 1998 June (MJD~50800–51000) which saw the brightness increase by  $\sim 3$  mag in the *R* band (Tosti et al. 1999). Ikejiri et al. (2011) observed this source from 2008–2010 and during this period the polarization was 3.5–19.6 per cent with an EVPA of  $60^\circ\text{--}80^\circ$ . They also found significant negative correlation between flux and polarization degree (see fig. 28 of Ikejiri et al. 2011). Sorcia et al. (2014) presented results from 2008 February to 2013 May and find a gradual decrease in mean flux over the  $\sim 5$  yr period of  $\sim 3$  mJy. They find a maximum degree of polarization of 33.8 per cent  $\pm 1.6$  per cent and a large rotation of the EVPA of  $\sim 237^\circ$  which coincided with a  $\gamma$ -ray flare in 2008 June.

The KVA-60 and RINGO2 data in this work show a degree of polarization and EVPA consistent with the source in a low state. We see slightly brighter optical and  $\gamma$ -ray fluxes in the first season (see

Fig. A10 in the appendix) and optical magnitude starts to decrease with the increase in degree of polarization at the end of our last observing season.

### 3.9 PKS 1222+216

PKS 1222+216 ( $z = 0.435$ , Veron-Cetty & Veron 2006) is a flat spectrum radio quasar (FSRQ), and therefore LSP, which has received a lot of attention since its discovery in VHE  $\gamma$ -rays (Aleksić et al. 2011). Very little optical polarization data are available in the literature. A single measurement from (Ikejiri et al. 2011) shows a degree of polarization of 5.9 per cent. The data presented here were taken in the 2011–2012 (MJD~55600–56100) observing season when the source was in a quiescent state in optical and  $\gamma$ -rays. The EVPA shows very little variation and the degree of polarization is low ( $< 10$  per cent).

### 3.10 3C 279

3C 279 ( $z = 0.536$ , Burbidge & Rosenberg 1965) was one of the first extragalactic  $\gamma$ -ray sources discovered (Hartman et al. 1992) and is one of the first flat spectrum radio quasars to be detected in very high energy  $\gamma$ -rays (Albert et al. 2008). Over  $\sim 10$  yr of observations the source showed variability ranging from 13 to 16 mag in the *R* band. In the space of  $\sim 100$  days the source became fainter by 3 mag (Larionov et al. 2008a) and from MJD 54120–54200 showed a rotation which they conclude is intrinsic to the jet. This rotation was coincident with a low degree of polarization which was higher before and after the rotation (at 23 per cent). The low polarization during the rotation is attributed by the authors to the symmetry of the toroidal component of the helical magnetic field. In the period prior to the start of the RINGO2 program the source showed a rapid decline in magnitude over the period of  $\sim 1$  month synchronous with an increase in polarization degree and a  $180^\circ$  rotation of the position angle (Abdo et al. 2010a). Kiehlmann et al. (2013), using data from RINGO2 and KVA-60 amongst other instruments, showed there was an increase in flux and degree of polarization along with a  $\sim 150^\circ$  rotation of the position angle in 2011 May (MJD 55700) the addition of *Fermi* data showed that during this period of  $\sim 2$  months the  $\gamma$ -ray flux decreases by  $\sim 100 [10^{-8} \text{ cm}^{-2} \text{ s}^{-1}]$  (Aleksić et al. 2014a). Aleksić et al. (2014a) interpreted this optical outburst with a rotation of the position angle and the increase in the degree of polarization as geometric and relativistic aberration effects such as an emission knot’s trajectory bending such that it crosses the observer’s line of sight (for full description see Aleksić et al. 2014a).

We have three seasons of polarimetric data and four seasons of photometric data. Having the same data as Kiehlmann et al. (2013) we see the same behaviour. In the third and fourth seasons we see rotations that rotate in one direction and then back on themselves. We see an additional rotation which is followed by a lack of data. The source drops in brightness at the start of the observing period and is at its highest in polarization ( $\sim 40$  per cent). The source is brightest in the optical in the last two seasons of observations where the degree of polarization dropping to lower values.

### 3.11 1ES1426+428

1ES1426+428 is a lesser studied BL Lac object at a redshift of  $z = 0.132$  (Urry 2000). It is classified as an extreme high-energy-peaked BL Lac object (HSP) (Costamante et al. 2001) and is an HE  $\gamma$ -ray source (Petry et al. 2000; Horan et al. 2002). Jannuzi et al. (1994) report an optical degree of polarization of  $< 7$  per cent over

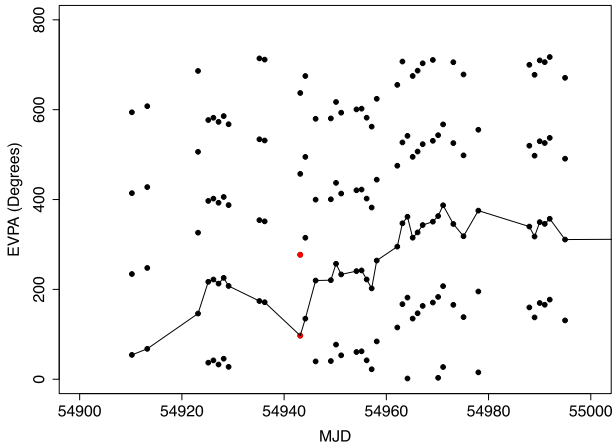

**Figure 1.** Zoomed view of PKS 1510-089 light curve (full light curve shown in appendix, Fig. A2). This plot can be compared with fig. 4 in Marscher et al. (2010) where the polarization angle data are interpreted as showing a  $720^\circ$  rotation. Here we report a rotation of less than half that ( $333^\circ$ ) and this is due to the interpretation of this particular data set by the EVPA trace code which, to account for the  $\pm 180$ , ambiguity identifies the next nearest lying point. The points in red highlight where the difference in identification originates.

the period of 1988–1990 MJD $\sim$ 47161–47892) and a non-constant EVPA which may show a slow rotation of  $\sim 150^\circ$ . The optical flux maintains a fairly constant value of between 16 and 17 in the *R* band. We find the degree of polarization stays below  $\sim 6$  per cent, the optical flux is constant with a median *R*-band magnitude of 15.6. The EVPA stays relatively constant within the error bars. The source is too faint in  $\gamma$ -rays to be significantly detected within the analysed time window.

### 3.12 PKS 1510-089

PKS 1510-089 is a  $\gamma$ -ray bright (Acciari et al. 2009) FSRQ/LSP at  $z = 0.36$  (Burbidge & Kinman 1966). The source has shown bright flares in optical, radio, X-ray and HE  $\gamma$ -rays at the beginning of 2009 (MJD $\sim$ 54910–54920), along with the first detection of VHE  $\gamma$ -rays (Abramowski et al. 2013). During the  $\gamma$ -ray flaring from MJD 54950–MJD 55000 (2009 April onwards) the optical EVPA was reported to rotate by  $>720^\circ$  and during the major optical flare the optical polarization degree increased to  $<30$  per cent (Marscher et al. 2010). In early 2012 (MJD 55960 and onwards) it again showed high activity in HE  $\gamma$ -rays and was also detected in VHE  $\gamma$ -rays. Again there was a  $>180^\circ$  rotation of the EVPA following this flare but the polarization degree stayed low  $\sim 2$  per cent (Aleksić et al. 2014b).

The polarimetric RINGO2 data we present for this source has been averaged over 5-d bins to account for the scatter in the data (see Section 2.2.2). Our data show the above mentioned  $\gamma$ -ray and optical flaring activity from the end of 2008 into 2009, we see a rotation in the EVPA at this time but due to interpretation of our data using the EVPA tracing code (see Section 2.3.2) we do not report a rotation as great as  $720^\circ$ , rather a rotation of  $333^\circ$ . The difference is due to the data sampling and thus highlights the need for intensive optical monitoring during  $\gamma$ -ray activity. For clarity we include a zoomed region of Fig. A2 (see Fig. 1) for comparison with the bottom panel of fig. 4 in Marscher et al. (2010). The red points show the EVPA data point at it is measured and at the  $+180$  position. The EVPA trace code in this work selected the lower of the two points as it is

closer to the previous point, had there been intermediate points the rotation might have shown to continue at a steeper gradient which would result in a  $\sim 600^\circ$  rotation measurement.

Ikejiri et al. (2011) report a correlation between *V*-band magnitude and degree of polarization. We see similar results in our analysis (see Table A1), however, because we lack data when the *R*-band magnitude was the brightest we are unable to populate the brighter end of the magnitude-degree of polarization plot.

### 3.13 PG 1553+113

PG 1553+113 is a  $\gamma$ -ray bright BL Lac object at  $z > 0.395$  (Danforth et al. 2010). It is a persistent source of VHE  $\gamma$ -rays (Aharonian et al. 2006; Albert et al. 2007a) which has triggered several multi-wavelength studies of the source (e.g. Aleksić et al. 2010). However, only few campaigns have included polarimetric observations. Polarization observations were reported in Albert et al. (2007a), Andruchow et al. (2011) and Ikejiri et al. (2011) with the maximum value for polarization degree of 8.2 per cent. The observations of Ikejiri et al. (2011), which cover the longest period of time, do not show a clear preferred angle for the EVPA. In 2008 (MJD $\sim$ 54600 onwards) the EVPA was  $\sim 100^\circ$ – $150^\circ$  while the later observations (in 2009 and 2010 (MJD $\sim$ 55100 and 55200) only single data points) show an EVPA  $\sim 50^\circ$ . RINGO2 and KVA-60 data suffer from poor sampling but agree with literature, showing an EVPA which is  $\sim 100^\circ$ – $150^\circ$  until 2012 March when there is a rotation over a period of a few months which coincides with a flare detected in HESS and MAGIC but not in *Fermi* (Abramowski et al. 2015; Aleksić et al. 2015).

### 3.14 Mrk 501

Mrk 501 ( $z = 0.0337$ , Ulrich et al. 1975) is a BL Lac type source which was discovered as a VHE  $\gamma$ -ray source in 1996 (Quinn et al. 1996) and above 1.5 TeV (Bradbury et al. 1997). The source was observed during a period of high activity in 1997 (MJD $\sim$ 50449) with a degree of polarization of 1–3 per cent (Joshi et al. 2000) and *R*-band magnitude  $\sim 13.5$  (Petry et al. 2000). The source showed a VHE flare in 2009 (MJD $\sim$ 54940) which was correlated with a 5 per cent increase in the optical degree of polarization, a significant increase compared to the typical polarization level of 1–3 per cent (Barres de Almeida 2011). Along with the increase in degree of polarization, the EVPA rotated by  $15^\circ$ . In the available data we see no rotations of the EVPA (see definition of EVPA in Section 2.3.2) and a very stable optical flux, the degree of polarization reaches  $\sim 6$  per cent which could be correlated with a small  $\gamma$ -ray flare, however, for the larger  $\gamma$ -ray flare the source was not visible from La Palma.

### 3.15 BL Lac

BL Lac ( $z = 0.069$ , Vermeulen et al. 1995) is a bright source of HE  $\gamma$ -rays and occasionally of VHE  $\gamma$ -rays (Albert et al. 2007b; Arlen et al. 2013). Its polarization has been extensively studied with the two long-term studies presented in Hagen-Thorn et al. (2002a,b). In these publications observations from 1969 to 1991 (MJD $\sim$ 40000–48500) were presented. It was found that the EVPA showed a preferred angle of  $\sim 22^\circ$  which is close to the direction of the jet in very long baseline interferometry (VLBI). In the second half of their data (1980–1991, MJD $\sim$ 44239–48500) BL Lac showed significant periodicity of 308 days both in total flux and relative Stokes parameter *q* (Hagen-Thorn et al. 2002b). The polarization degree for this 22 yr period varied from  $<1$  per cent to  $\sim 40$  per cent.



In 2005 October (MJD~53660) the source underwent a double peaked optical outburst with rapid rotation of the EVPA during the first outburst, this led Marscher et al. (2008) to conclude that the rotation took place in the collimation and acceleration zone of the jet where a helical magnetic field would be present. In 2011 June (MJD~55710) a rapid TeV flare was detected which coincided with a rapid change in optical polarization angle (Arlen et al. 2013). This was concluded to support the model of Marscher et al. (2008). Raiteri et al. (2013) whose data coincide with that of this work, report an EVPA of  $\sim 15^\circ$  which is nearly aligned with the radio core EVPA and mean jet direction.

The EVPA tracing code presented in this paper (see Section 2.3.2) identifies four polarization angle rotations in the BL Lac data, however, only two of these can be classified as ‘true’ rotations according to the condition that the rotation must consist of four or more measurements with significant swings between them. The degree of polarization varies between values of  $\sim 25$  per cent and little or no polarization signal at all. The drop to a degree of polarization of  $\sim 0$  coincides with an EVPA rotation and a  $\gamma$ -ray flare, along with an increase in the optical magnitude, and is consistent with previously reported behaviour.

## 4 DISCUSSION

In this section comparisons are made between the polarization properties, optical flux and  $\gamma$ -ray flux for those sources with reasonable sampling. This sample is subject to selection biases and therefore the results in this work cannot be generalized to the larger blazar population. For those sources which have been observed only for a short period of time, which have sparse data sampling or lack sufficient multi-wavelength information (Mrk 180, 1ES 1011+496, 1ES 1426+496 and 1ES 1218+304) only optical-optical analysis and their light curves (see appendix) are presented and they are excluded from the  $\gamma$ -ray analysis. The following section explores correlations between the optical data and the  $\gamma$ -ray flux, along with the frequency of flares in relation to optical polarization rotations.

### 4.1 Correlation analysis

Correlations between the optical and  $\gamma$ -ray data can give information about the emission regions and magnetic field structure within the jets of the different blazars. Optical flux (lacking a strong polarization signal) can also originate from outside the jet.

Due to observational constraints from ground-based telescopes, along with weather and observing priorities, we have imperfectly sampled optical data. While it is possible that the continuous *Fermi*  $\gamma$ -ray data could be binned to coincide with optical monitoring this could not be possible with the adaptive binning code used in this work as it automatically sets the bin sizes according to the gamma-ray brightness of the source (see Section 2.1.4). The binning of  $\gamma$ -ray data according to optical observations is likely to dilute flaring behaviour (which is displayed in more detail with the adaptive binning method) and also involve difficulties in establishing bin sizes because the optical observations only take  $\sim 1$ – $5$  min.

In order to match the optical and  $\gamma$ -ray data points (which are of course not completely synchronous) we explore two methods. In method one we use each of the dates associated with optical observations and interpolate a value from the  $\gamma$ -ray light curve for this date by fitting a gradient to the nearest neighbouring  $\gamma$ -ray points and calculating the matched  $\gamma$ -ray flux using the equation for a straight line. The plots in Fig. 2 are produced by such a method

and show the overall behaviour of the sources according to their different subclasses.

It is also possible to match the optical and  $\gamma$ -ray data by using the same bins as the  $\gamma$ -ray data to bin the optical data. This method produces correlation plots (see Fig. 3) which are less dense than those produced by leading with optical data sampling (compare with Fig. 2). Binning of optical data in this way results in higher temporal frequency optical activity being averaged out. As the focus of this paper is the optical data we therefore use our first method in the following analysis. The same method is applied using the optical polarization degree dates. When data from one wavelength do not change over a period in which data from the other wavelength does change then these periods appear on the correlation plots as straight horizontal or vertical lines.

We use the Spearman Rank Coefficient test to determine the correlation of the data. The null hypothesis states that the two variables are not correlated. If  $p < 0.05$  then the null hypothesis can be rejected. Significant correlations are indicated by  $p > 0.95$  (no correlation) or  $p < 0.05$  (correlation). For the analysis that involves magnitude, the values of the correlation coefficient  $\rho$  have been calculated so that the reverse nature of the parameter is appropriately used.

For exploring the distributions of Spearman Rank test results, we will use the Kolmogorov–Smirnov (KS) test where the null hypothesis is that the two samples are drawn from the same population where  $p = 1$  suggests there is a strong probability that the samples come from the same parent distribution.

#### 4.1.1 Optical and $\gamma$ -ray flux correlations

Fig. 2 shows six plots of  $\gamma$ -ray flux against optical magnitude for all sources and five different subclasses; BL Lacs and FSRQs (identified according to the presence/size of optical emission lines) and HSP, ISP and LSP sources (classified according to the location of the synchrotron peak in their SEDs). It is evident in the plot of all sources that there are two visible subclasses, both with positive correlations but different ranges in optical and  $\gamma$ -ray fluxes. These two subclasses are shown to be the FSRQ and BL Lac sources in the next two plots. So not only do these sources show differences in the strength of their optical emission lines, they also cover different ranges in  $\gamma$ -ray flux and optical magnitude. The bottom three plots in Fig. 2 show that the sources split by the location of their synchrotron peak also cover different ranges in  $\gamma$ -ray and optical flux. LSP sources are brightest in  $\gamma$ -ray flux, there is a decrease in maximum  $\gamma$ -ray flux as the spectral peak moves towards higher frequencies, with the HSP sources in this sample having a much lower range in  $\gamma$ -ray fluxes compared with LSPs.

In Table 3 the results of the Spearman Rank analysis of this data are presented and it is demonstrated that (due to differing distances of the sources), the ‘whole sample’ approach is not particularly useful. Rather we must consider the properties of each source (which are differently coloured in the figure) individually. In addition in order to investigate the properties of the individual sources the data were first separated into observing seasons (to avoid false periods of apparently stable behaviour introduced by long periods of non-visibility (Itoh et al. 2013)). The number of seasons for each source depends on the availability of the optical data and vary from 1 to 4 seasons.

For each of the season data sets a Spearman Rank Coefficient test was performed to measure the statistical dependence of one flux against the other. A summary of these results are presented, along

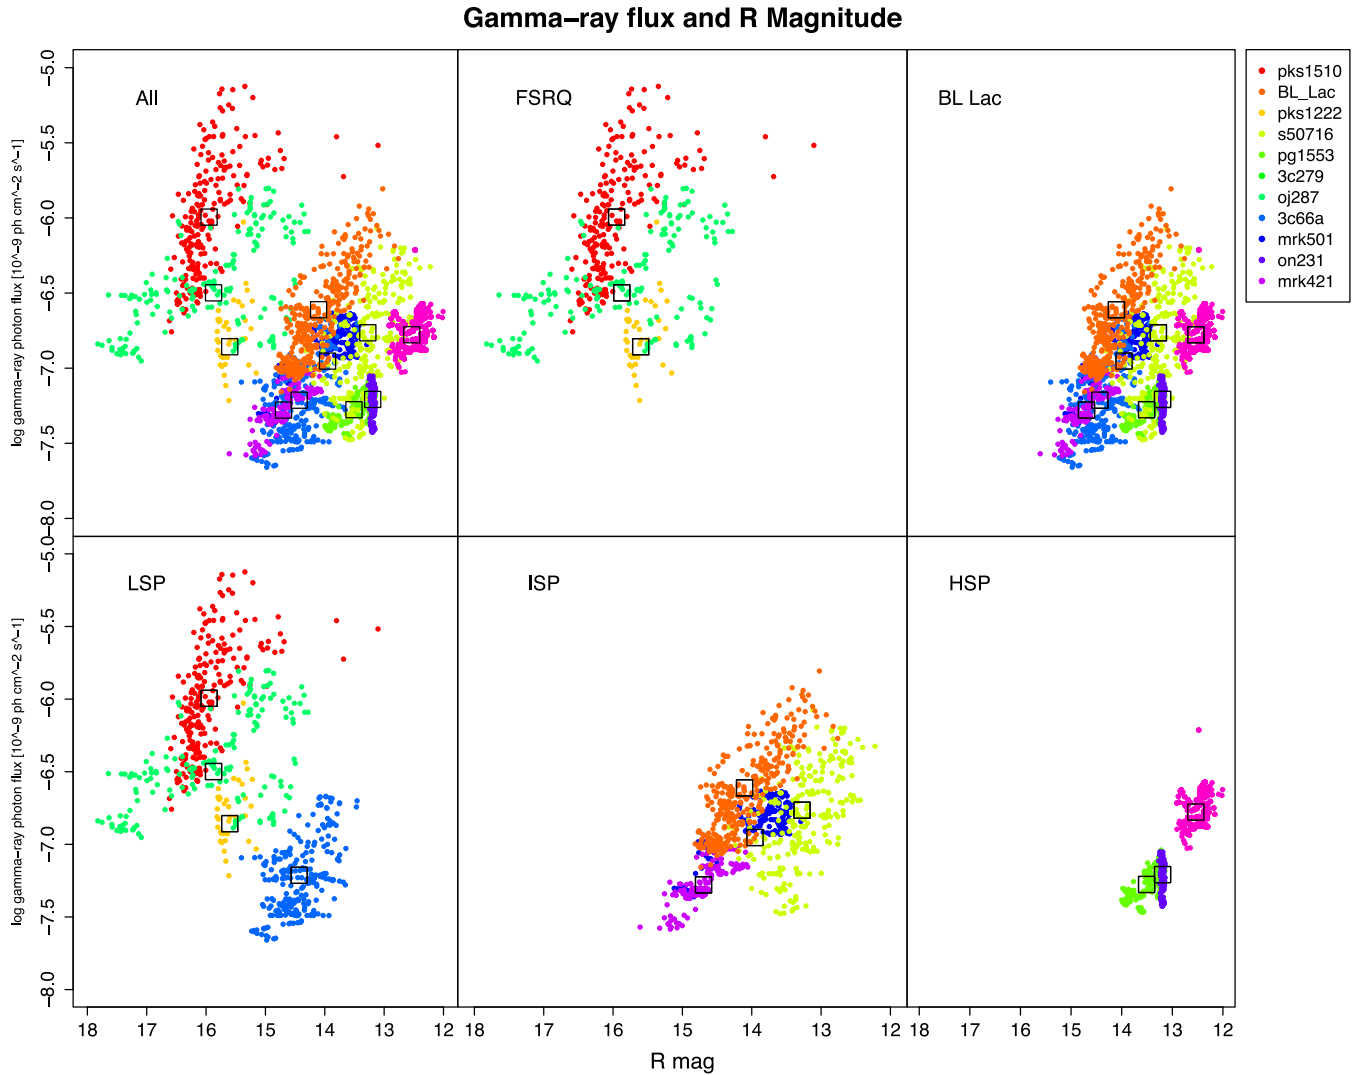

**Figure 2.** *Fermi*  $\gamma$ -ray data plotted against magnitude for 11/15 sources (those which have  $>5$   $\gamma$ -ray data points) (each with a separate colour) and subsequent blazar subclasses: FSRQs, BL Lacs, LSPs, ISPs and HSPs. The  $\gamma$ -ray data points are interpolated to match the date of the optical data points (see Section 4.1). Black squares show the mean  $\gamma$ -ray and optical value for each source.

with those for other correlations, in Table 4. Results for individual source seasons can be found in Table A1 in the appendix. We find that 68 per cent of source seasons (25/37) show a positive correlation  $\bar{\rho} = 0.46$  with significant  $p$  values (i.e.  $p \leq 0.05$  or  $p \geq 0.95$ ). In addition, 92 per cent of source seasons (34/37) show positive correlations ( $\bar{\rho} = 0.36$ ) with  $p$  values ranging between 0.000 and 0.988.

A KS test was performed on the HSP and ISP, ISP and LSP and HSP and LSP sources, respectively, to test whether the distribution of the Spearman Rank Coefficient  $\rho$  values for different blazar subclasses suggests that the subclasses originate from the same parent population. The mean of the distributions for each subclass are  $\bar{\rho} = 0.30, 0.43$  and  $0.34$  for HSP, ISP and LSPs, respectively. The  $p$  values from the KS test indicate the probability of the HSP and ISP sources being from the same parent population is 56 per cent, for ISP and LSP sources the probability is 58 per cent and for the HSP and LSP sources the probability is 84 per cent. It is not possible to distinguish these probabilities from each other and none has a significant  $p$  value to either indicate the subclass results are or are not drawn from the same parent distribution.

#### 4.1.2 Optical degree of polarization and $\gamma$ -ray flux correlations

Fig. 4 shows the  $\gamma$ -ray flux against optical degree of polarization for all sources (each coloured individually) and the five subclasses. The  $\gamma$ -rays are plotted on a logarithmic scale for visualization purposes. The horizontal lines are caused by the polarization varying during a wide  $\gamma$ -ray flare bin, usually in low  $\gamma$ -ray states. The vertical lines are caused by the  $\gamma$ -ray flux varying when the degree of polarization is very low. For the  $\gamma$ -ray and degree of polarization plots it is not possible to distinguish the FSRQ and BL Lac subclasses from each other. The FSRQs exhibit higher  $\gamma$ -ray fluxes than the BL Lacs. The spectral peak subclasses differ in their  $\gamma$ -ray flux value (as already shown in the previous section), however they also differ in their maximum degree of polarization value. The LSP sources can exhibit polarization degrees up to  $\sim 40$  per cent, ISPs  $\sim 30$  per cent and the HSP sources have a maximum of  $\sim 10$  per cent. The HSP sources also show less variation than the LSP and ISP sources.

In order to investigate the correlations in more detail we again split the data by individual source and by observing season and carried out a Spearman Rank analysis (see summary of results in

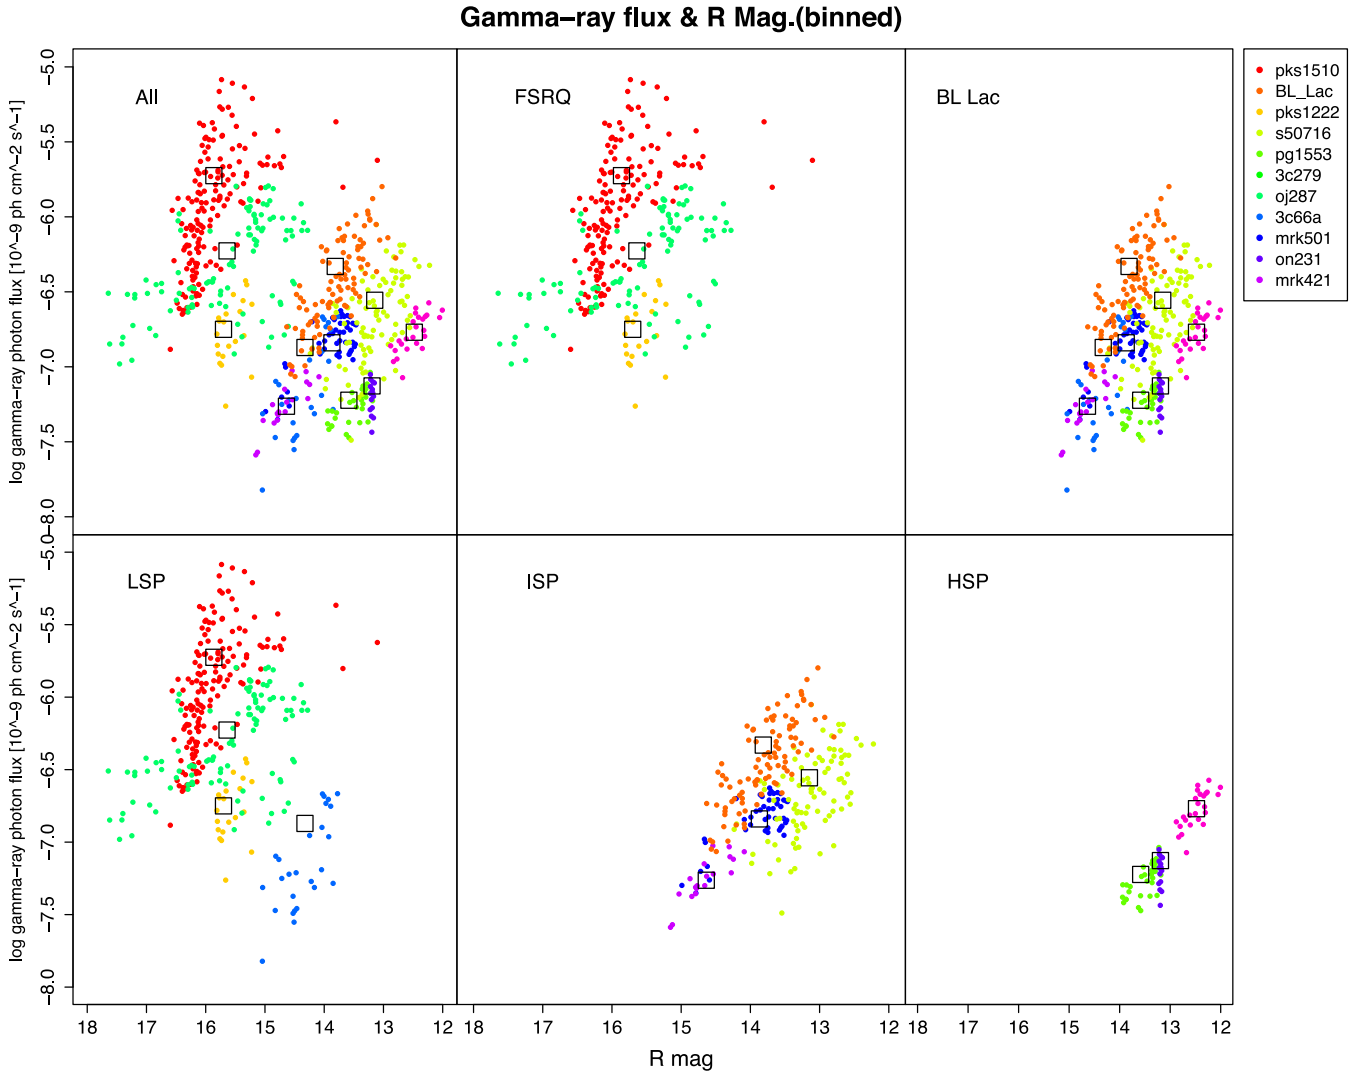

**Figure 3.** The sample plots as Fig. 2 with optical data points binned according to the range of the *Fermi* bins. There are fewer data but the overall trends are similar.

**Table 3.** Spearman rank correlation coefficient  $\rho$ , p value and number of sources for each blazar subclass for the  $\gamma$ -ray and optical flux correlations (See Fig. 2 for plots).

|        | $\rho$ | p                      | N  |
|--------|--------|------------------------|----|
| All    | -0.153 | $6.4 \times 10^{-14}$  | 13 |
| FSRQ   | 0.149  | $7.3 \times 10^{-4}$   | 3  |
| BL Lac | 0.395  | $<2.2 \times 10^{-16}$ | 10 |
| LSP    | -0.539 | $<2.2 \times 10^{-16}$ | 4  |
| ISP    | 0.578  | $<2.2 \times 10^{-16}$ | 4  |
| HSP    | 0.597  | $<2.2 \times 10^{-16}$ | 5  |

Table 4). In Fig. 5 we show the distribution of the  $\rho$  coefficients as histograms. The peak of the overall distribution is close to zero (as shown in Table 4). However the peak of the  $\rho$  value distributions for the LSP and HSP sources are positive and for ISP sources, negative. All HSP and LSP source seasons show positive correlations with  $p \leq 0.05$ , whereas ISP sources have a slight majority of positive correlations (2/3) with  $p \leq 0.05$ .

We carried out a KS test analysis on the distribution of  $\rho$  values. The HSP and ISP distributions have 44 per cent probability of being

from the same parent distribution and the HSP and LSP distribution have a 42 per cent probability. The probability of the ISP and LSP sources being from the same distribution is 48 per cent. None of these p values is significant.

#### 4.1.3 Optical flux and degree of polarization correlations

Fig. 6 shows plots of the degree of polarization against the optical magnitude separated by object type. Here we plot all 15 sources in our sample (i.e. including those without *Fermi* data). Those sources that do not have synchronous magnitude and degree of polarization (Mrk 180 and PKS 1222+216) have their points interpolated from neighbouring data where available. In addition as the data are synchronous they are not split into seasons but compared across the whole available data set. As already shown in the previous correlation plots, the HSP sources are limited to degree of polarization values  $<10$  per cent, while the LSP and ISP sources show greater variability, reaching a maximum polarization of  $\sim 40$  per cent and  $\sim 30$  per cent, respectively. The HSP sources show tighter groupings than the LSP and ISP sources.

**Table 4.** Summary of results from the Spearman Rank correlation test showing the  $p$  and  $\rho$  values for different subclasses for optical versus  $\gamma$ -ray data, degree of polarization versus  $\gamma$ -ray data and optical flux versus optical degree of polarization. The full data set is presented in Table A1 in the appendix.

|         |      | All P                          |                              |          |             | $p \leq 0.05$              |          |              |             |                            |          |
|---------|------|--------------------------------|------------------------------|----------|-------------|----------------------------|----------|--------------|-------------|----------------------------|----------|
|         | Type | Range $p$                      | Range $\rho$                 | Mean $p$ | Mean $\rho$ | Quantity<br>$-\rho, +\rho$ | Quantity | Range $\rho$ | Mean $\rho$ | Quantity<br>$-\rho, +\rho$ | Quantity |
| mag-gam | HSP  | $2.20 \times 10^{-16}$ –0.620  | –0.0929–0.745                | 0.210    | 0.299       | 1,6                        | 7        | 0.502–0.745  | 0.608       | 0,3                        | 3        |
|         | ISP  | $4.97 \times 10^{-11}$ –0.524  | –0.067–0.718                 | 0.115    | 0.429       | 0,16                       | 16       | 0.287–0.718  | 0.567       | 0,10                       | 10       |
|         | LSP  | 0.000–0.988                    | –0.600–0.711                 | 0.141    | 0.337       | 2,12                       | 14       | –0.600–0.711 | 0.390       | 2,10                       | 12       |
|         | ALL  | 0.000–0.988                    | –0.600–0.745                 | 0.142    | 0.369       | 3,34                       | 37       | –0.600–0.745 | 0.487       | 2,23                       | 25       |
| gam-deg | HSP  | $1.89 \times 10^{-13}$ –0.419  | –0.121–0.633                 | 0.196    | 0.231       | 1,4                        | 5        | 0.160–0.633  | 0.397       | 0,2                        | 2        |
|         | ISP  | $6.68 \times 10^{-4}$ –0.946   | –0.560–0.411                 | 0.370    | –0.0382     | 8,8                        | 16       | –0.560–0.272 | –0.229      | 2,1                        | 3        |
|         | LSP  | $1.52 \times 10^{-6}$ –0.925   | –0.249–0.556                 | 0.340    | 0.0619      | 6,5                        | 11       | 0.360–0.556  | 0.426       | 0,3                        | 3        |
|         | ALL  | $1.89 \times 10^{-13}$ –0.946  | –0.560–0.633                 | 0.332    | 0.038       | 15,17                      | 32       | –0.560–0.633 | 0.173       | 2,6                        | 8        |
| deg-mag | HSP  | $1.98 \times 10^{-5}$ –0.695   | 0.0876–0.549                 | 0.312    | 0.268       | 0,7                        | 7        | 0.468–0.513  | 0.525       | 0,2                        | 2        |
|         | ISP  | $1.53 \times 10^{-11}$ –0.0754 | –0.485–0.395                 | 0.0212   | 0.0334      | 2,2                        | 4        | –0.460–0.403 | 0.0697      | 1,2                        | 3        |
|         | LSP  | 0.0607–0.999                   | $5.47 \times 10^{-4}$ –0.270 | 0.472    | 0.154       | 0,4                        | 4        | NA           | NA          | NA                         | 0        |
|         | ALL  | $1.53 \times 10^{-11}$ –0.999  | –0.485–0.549                 | 0.277    | 0.175       | 2,13                       | 15       | –0.460–0.513 | 0.252       | 1,4                        | 5        |

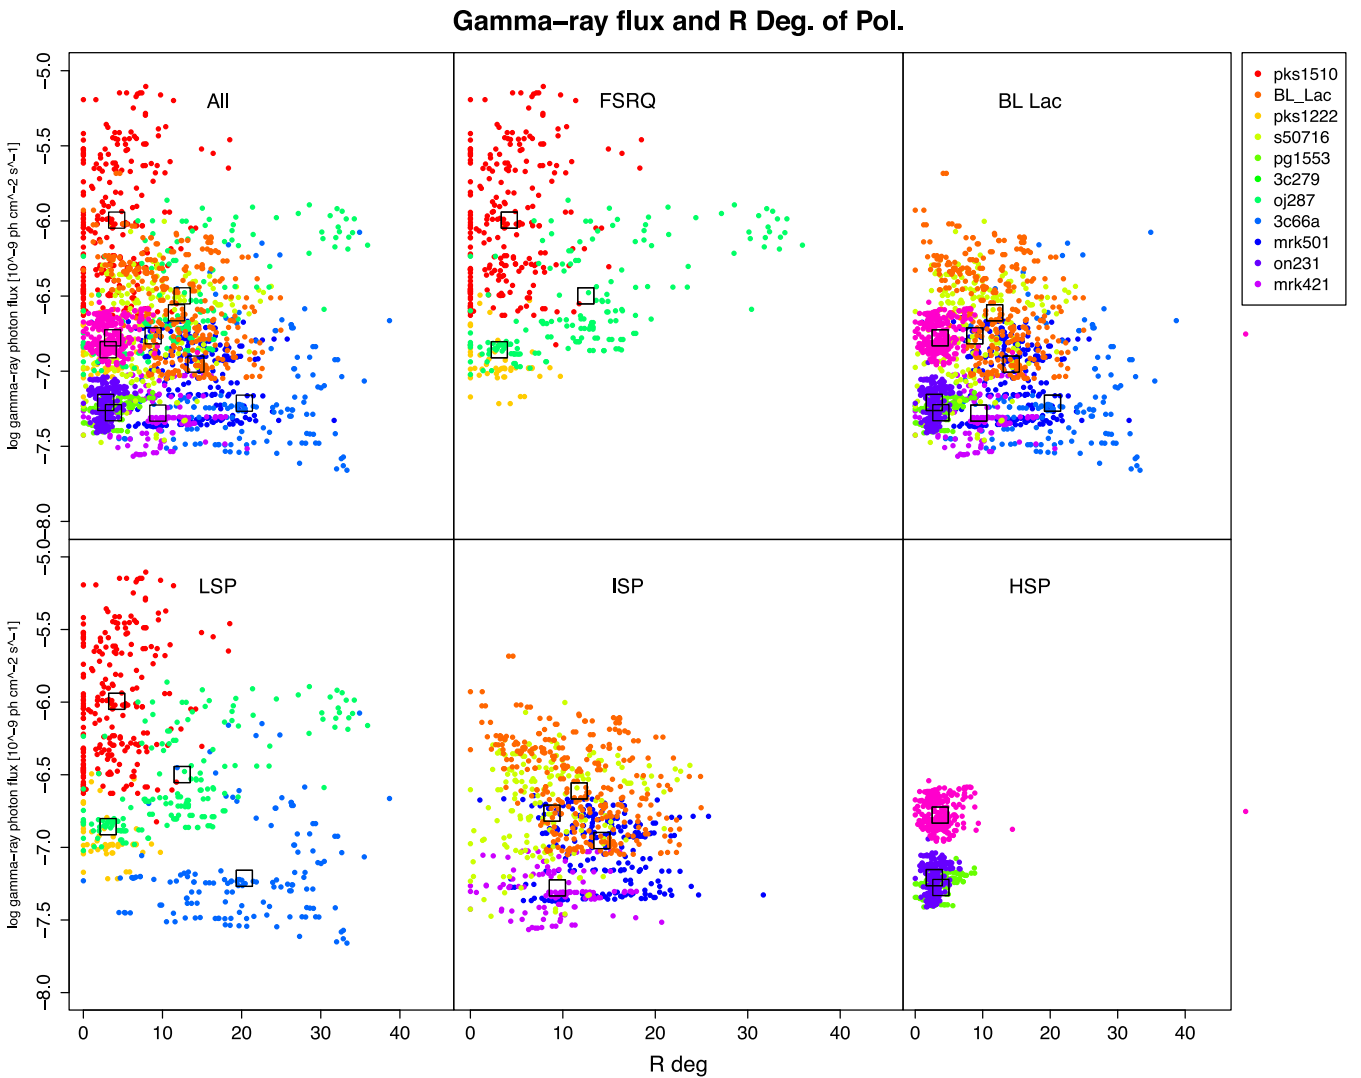**Figure 4.** *Fermi*  $\gamma$ -ray flux against optical degree of polarization for all sources and each blazar subclass, a different colour for each source separately. Black squares show where the mean of the source lies on the plot. Horizontal and vertical lines in the data show periods during which the  $\gamma$ -ray/optical data (respectively) are constant while the other continues to vary.

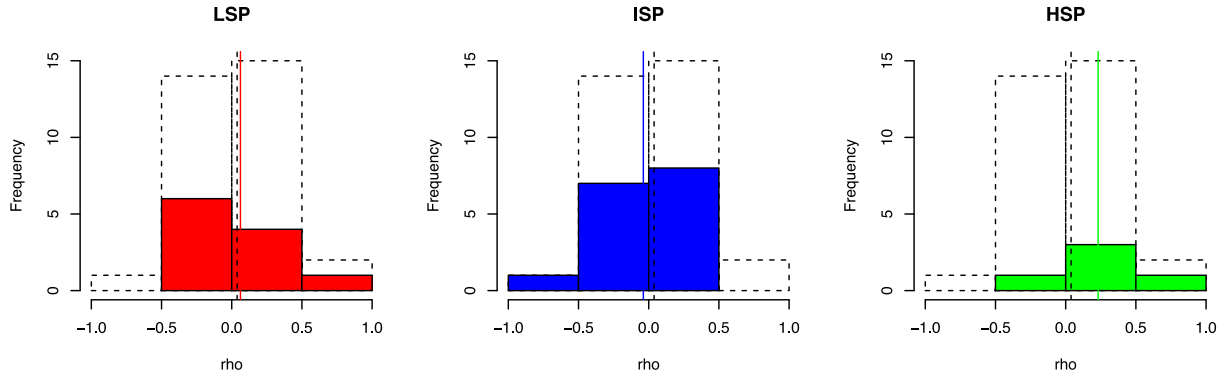

**Figure 5.** Histograms showing the distribution of  $\rho$  values from the Spearman Rank Coefficient test for the optical degree of polarization and  $\gamma$ -ray flux. From left to right: LSPs (red), ISPs (blue) and HSPs (green). The dotted histograms are the distribution of the total sample and the black vertical lines show where the sample mean lies. The mean of the subclasses are shown as a vertical line in their respective colours.

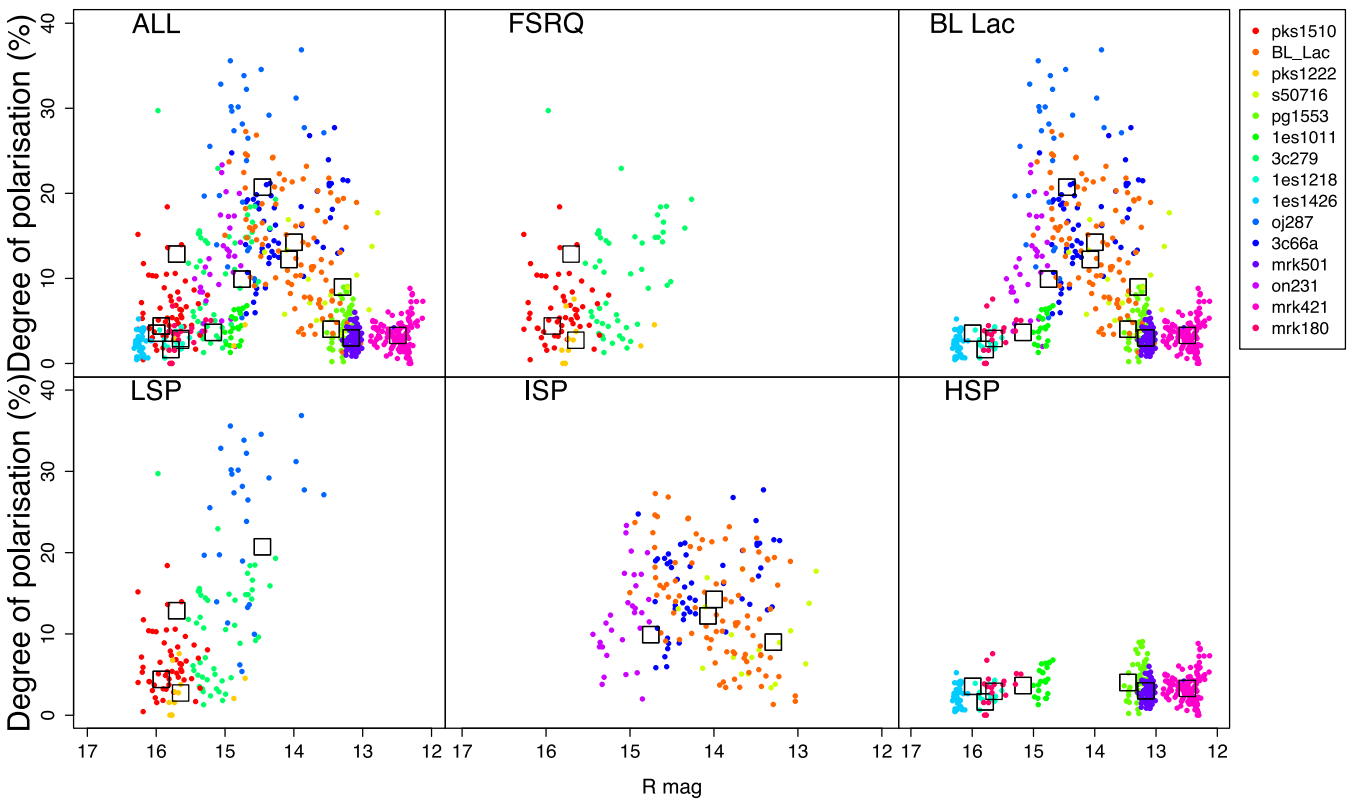

**Figure 6.** The optical degree of polarization against optical magnitude for all 15 sources. For those sources that do not have synchronous points (i.e. Mrk 421 and PKS 1222) we interpolate the nearest lying point from the neighbouring data points. Each source is coloured separately and black boxes show where the mean of that source lies on the plot.

Table 4 shows the Spearman Rank Coefficient  $\rho$  and probability values for the optical flux and degree of polarization data. 87 per cent (13/15) of sources show weak positive correlations between the optical flux and the optical degree of polarization with  $\bar{\rho} = 0.18$ . In addition, four sources show weak positive correlations with  $p \leq 0.05$ , however, the HSP sources lack significant correlations (where  $p \leq 0.905$ ).

The probability of the HSP, ISP and LSP distributions being from the same parent sample was tested using the KS test. For HSP and ISP sources  $p = 0.42$ , ISP and LSP  $p = 0.77$  and HSP and LSP  $p = 0.66$  also. None of these  $p$  values is significant and the null hypothesis cannot be rejected.

#### 4.2 Optical and $\gamma$ -ray properties during EVPA rotations

We have identified 95  $\gamma$ -ray flare events (see Section 3 for the description of a flaring event) in 11 sources. In the sample, the rate of flaring is between 0.0022 and 0.017 flares per day (0.8–6.2 per year). The mean flare rates (and standard deviations) for each subclass are HSP =  $0.005 \pm .001$ , ISP =  $0.007 \pm 0.003$  and LSP =  $0.009 \pm 0.006$  flares per day, equivalent to HSP =  $2.0 \pm 0.5$ , ISP =  $2.6 \pm 1.2$ , LSP =  $3.3 \pm 2.3$  flares per year. These results indicate that there are no significant differences between the rate of flaring in the different subclasses.

In order to make a simple assessment if flaring and rotation activity are associated we can compare the number of flares per

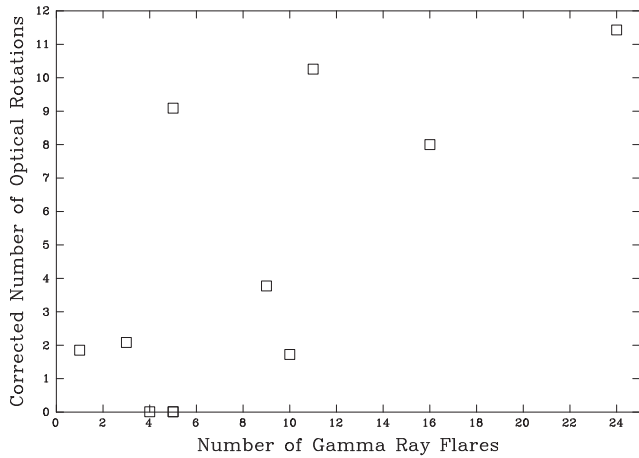

**Figure 7.** Number of observed optical rotations (corrected for the observing duty cycle) versus number of observed  $\gamma$ -ray flares for those sources which have sufficient  $\gamma$ -ray data (11/15 sources) – note there are two points at  $x = 5, y = 0$ .

source with the number of rotations. Since there is missing optical data due to seasonal effects, we correct the number of rotations of a given source by dividing by its optical duty cycle (defined as the fraction of time when optical coverage overlapped with the *Fermi* data). The results of this analysis are presented in Fig. 7. A significant correlation ( $\rho = 0.59, p = 0.05$ ) is apparent. It therefore appears that there is at least some link between a propensity for  $\gamma$ -ray flaring and that for optical polarization rotations.

Due to the visibility of the sources, 67 of the  $\gamma$ -ray flaring periods occur when we lack coincident optical data or there are no data between the data point and the nearest flare. Of the remaining 28  $\gamma$ -ray flares that have optical photometry and polarimetry in coincident periods with the  $\gamma$ -ray data there are 17 that occur during rotation of the EVPA (see Table 2, Column 10). However we note that this statistic is dominated by one source (PKS 1510-089) which has the highest mean flare rate and multiple flares within a single long EVPA rotation. In addition we can associate 11 flares that occur outside an EVPA rotation with the closest in time EVPA rotation (i.e. the nearest lying rotation to a flare where there are no missing data in between). There are five flares that occurred  $<84$  days after the rotation and six flares that occurred  $<116$  days before the rotation (see Table 2, Column 9). Even though we do not analyse flares that occur during periods when we lack optical data, we must be cautious: the average observing season is  $\sim 180$  days which means that it may be possible that flares could be associated with closer lying rotations that occur when we are unable to observe them.

In order to investigate the  $\gamma$ -ray and optical properties during and outside of rotations we separated the data for each source into two periods: during (a) rotation and (b) non-rotation. The first two histograms in the top panel of Fig. 8 show the degree of polarization for all sources during those periods. The data are presented as a percentage of the full range of the degree of polarization for a particular source and the whole histogram has been divided by the ratio of the number of points in the larger data set (outside of EVPA rotations) over the number of points in the smaller data set (during EVPA rotations), this removes rare events from the analysis and takes into account any selection effects. After this normalizing we find that the distributions do not change and each bin still has  $\geq 1$  occurrence.

The top panel shows the distribution of the degree of polarization during a rotation is generally shifted towards lower values and the

high polarization tail is suppressed. Outside of the rotations the data appears to have a more Gaussian distribution. The mean of the distributions of degree of polarization ( $D\bar{o}P$ ) during a rotation is 0.34 and outside of a rotation  $D\bar{o}P = 0.46$ . On average the degree of polarization is therefore 26 per cent lower during a rotation. A KS test was performed on the data to establish the probability that the degree of polarization during rotation and non-rotation events are from the same parent distribution. There is a very low probability ( $p < 0.01$  per cent) that the degree of polarization during rotations comes from the same distribution as the degree of polarization during non-rotations. The null hypothesis is rejected and we can state that the distribution of the degree of polarization is different during rotations to outside of rotations.

In the middle panel of Fig. 8 the first two histograms show the  $R$  magnitude, during EVPA rotations and outside EVPA rotations, as a fraction of the normalized range of the total magnitude. Similar to the degree of polarization, in very relatively few points does the magnitude reach  $>90$  per cent of the total flux during a rotation whereas outside of rotations the are  $\sim 300$  points that have polarization values  $>90$  per cent of the total flux. The mean of the distribution during a rotation is  $\bar{R} = 52$  per cent and outside of rotation periods the magnitude is  $\bar{R} = 59$  per cent. On average the degree of polarization is therefore 17 per cent lower during a rotation. The results from the KS test show, as for the degree of polarization, the two distributions of magnitude during and outside of rotation periods have a very low ( $p < 0.01$  per cent) probability of being from the same distribution. The null hypothesis is again accepted; during a rotation the optical flux is lower compared to outside of a rotation and their distributions are not from the same initial sample.

The first two histograms in the bottom panel of Fig. 8 show the relative strength of the  $\gamma$ -ray flux during- and outside of- EVPA rotations. During the rotations the  $\gamma$ -ray flux never rises above 59 per cent of the total  $\gamma$ -ray flux. Outside of the rotations the  $\gamma$ -ray flux has a longer high- $\gamma$  flux tail, with the maximum brightness occurring outside of a rotation event. The KS test results show that the likelihood of the rotation and non-rotation  $\gamma$ -ray flux to be from the same parent population is 24 per cent. This means the null hypothesis, that the samples are from the same distribution, cannot be formally rejected. However we note that during rotations, the mean of the  $\gamma$ -ray flux distribution ( $\bar{\gamma} = 10$  per cent) is 42 per cent lower compared to that outside of a rotation ( $\bar{\gamma} = 17$  per cent).

The third column in Fig. 8 shows, for each individual source, the mean ratio of degree of polarization (top),  $R$  magnitude (middle) and  $\gamma$ -ray flux (bottom) during and outside of a rotation. For the degree of polarization, 5/8 sources have lower values (i.e. ratios  $< 1$ ) during rotations. For the  $R$  magnitude there are 7/8 sources that have lower values during a rotation. For the  $\gamma$ -rays there are 5/8 sources which are less bright in  $\gamma$ -rays during a rotation.

## 5 CONCLUSIONS

There are important caveats to consider before making concluding remarks about the results presented in this paper. First, the RINGO2 blazar monitoring survey was designed to follow-up sources detected by MAGIC, the original sample size has increased, but the essence of the sample is that the sources are all  $\gamma$ -ray bright and have exhibited some kind of flaring activity (hence the reason they are added to the sample). Thus, due to this selection bias, the presented sample averaged results (Section 4) cannot be generalized to the larger blazar population, however the correlations for individual sources (Section 3) are robust.

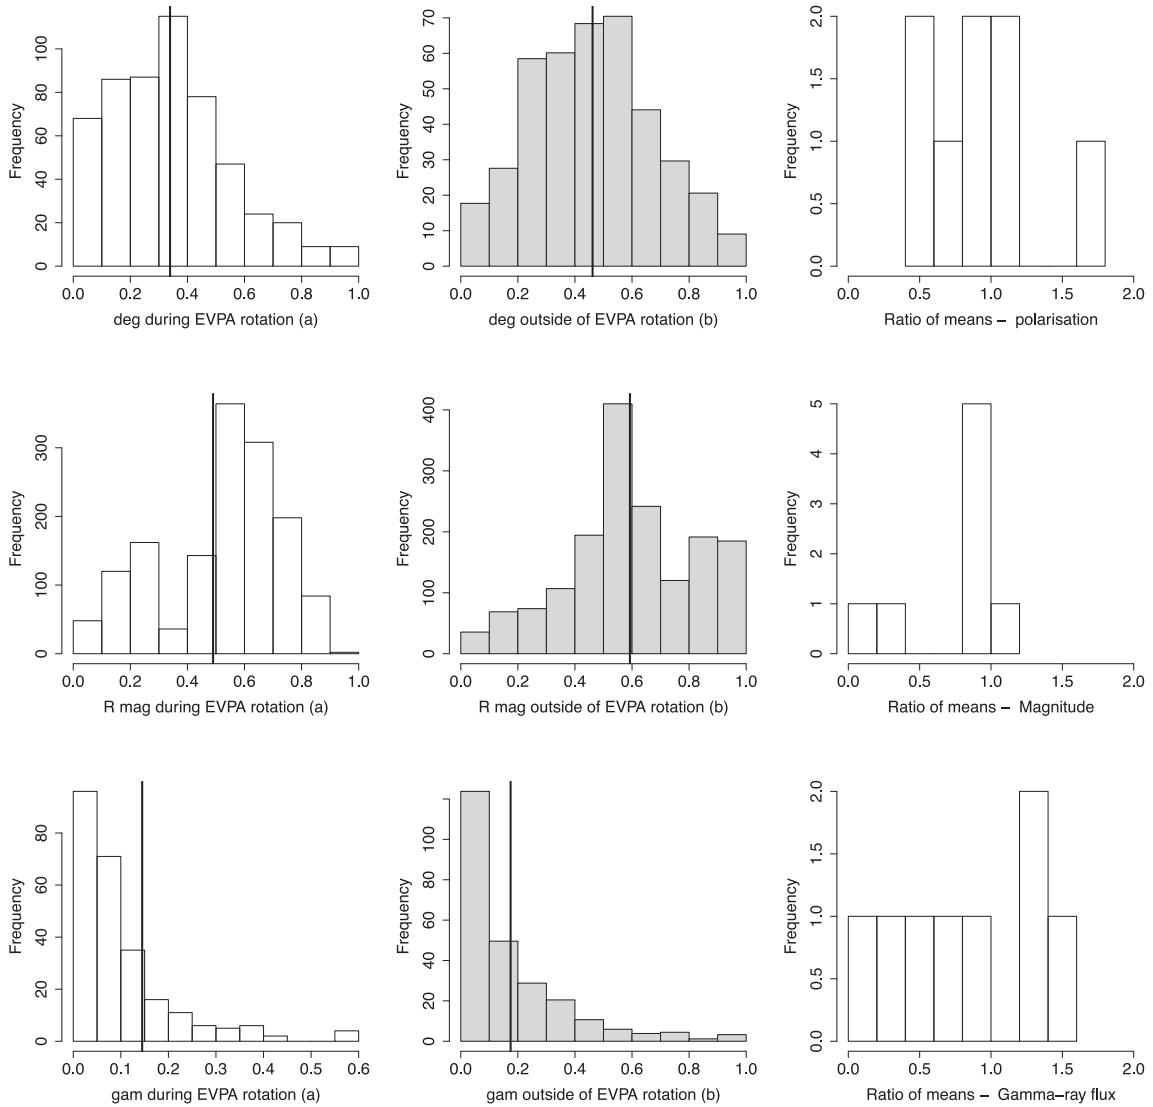

**Figure 8.** The degree of polarization (top), optical magnitude (middle) and  $\gamma$ -ray flux (bottom) displayed as a fraction of the normalized range for (a) during EVPA rotations (white) and (b) outside of EVPA rotations (grey) and (c) as a ratio of the mean of each property during a rotation over the mean of each property outside of a rotation for each individual source (see Section 4.2 for more details). The black vertical lines in the first two columns show the mean of the histograms.

In Section 3 we presented a detailed discussion of the behaviour of the individual sources in our sample. Comparing source to source the orientation of the rotation (i.e. whether it is upwards or downwards) does not afford any information as the rotation direction is presumably subject to the arbitrary sense of the magnetic field and its properties which will vary from blazar to blazar. However, in four sources 3C279, PKS 1510-089, PG 1553+113 and S5 0716+714 we observe upwards then downwards rotations and in the case of S5 0716+714 we see the EVPA rotate upwards, downwards and then upwards again (see light curves for these sources in the appendix). We also have cases in four sources PKS 1510-089, S5 0716+714, PG 1553+113 and Mrk 421 in which there is a  $\gamma$ -ray flare, during or temporally close, associated with a rotation. Such behaviour of the EVPA is potentially important in studying the magnetic field and/or the orientation of the jet/emission blob within the jet with respect to the observer. Monte Carlo analysis by Blinov et al. (2015) suggests that a single EVPA rotation event can be caused by a random walk of the EVPA, but it was unlikely that *all* rotations are due to random walk.

In Section 4 we carried out a statistical study of the general properties of these sources without considering their individual behaviour. We found the following principal results.

(i) The maximum observed degree of optical polarization for the LSP sources was  $\sim 40$  per cent. For ISP sources it was  $\sim 30$  per cent and for HSP sources  $\sim 10$  per cent. It is natural to attribute the low maximum polarization degree in HSP sources to their optical light being dominated by non-synchrotron emission which could originate from the accretion disc or emitting regions outside of the jet. This explanation also accords with the low optical variability in these sources, however it could also be a signature of low-ordered magnetic fields in the jet. It must also be noted that these results cannot be applied to the larger blazar population.

(ii) On average the optical degree of polarization and  $\gamma$ -ray flux are not strongly correlated. ISP and LSP sources show no strong preference for either positive or negative correlations. HSP sources show a stronger (yet still weak) positive correlation.

(iii) In 92 per cent (34/37) of source seasons we found a positive correlation ( $\bar{\rho} = 0.37$ ) between optical and  $\gamma$ -ray flux. In over half of the seasons (25/37 = 68 per cent) the probability of correlation is significant (i.e.  $p \leq 0.05$ ). Similar findings have also been reported by Hovatta et al. (2014) and Cohen et al. (2014). Such behaviour may provide evidence of a close physical association between the optical and  $\gamma$ -ray emitting regions in blazars. We find no significant evidence to determine if the HSP, ISP and LSP distributions of the correlation coefficient were similar or not. This suggests, on average, a common mechanism connects  $\gamma$ -ray flaring and optical polarization in these different blazar subclasses.

(iv) There is a weak positive ( $\bar{\rho} = 0.18$ ) correlation between optical flux and degree of polarization in 13/15 source seasons. In 5/15 cases the probability of correlation ( $\bar{\rho} = 0.25$ ) is significant (i.e.  $p \leq 0.05$ ).

(v) All blazar subclasses show  $\gamma$ -ray flaring and EVPA rotations. There is a significant correlation ( $\rho = 0.59$ ,  $p = 0.05$ ) between the number of flares and the number of EVPA rotations in a given object. We do not, however, find any systematic difference by class in  $\gamma$ -ray flaring rate or number of EVPA rotations.

(vi)  $\gamma$ -ray flaring episodes can occur during and outside of rotation events. The distribution of lead and lag values between flares and rotations show that there is no preference for either behaviour. The association of the  $\gamma$ -ray flare and the EVPA rotation could provide evidence for the cause of the rotation and the flare originating from the same shock region, whereby the shock provides electrons for up-scattering photons via Inverse-Compton processes and the tangled magnetic field providing the structure for the EVPA rotation. However, optical and gamma-ray flaring is not always synchronous with an observed rotation, suggesting that other mechanisms are involved in some instances.

(vii) The mean degree of polarization as a percentage of the total range of polarization is 26 per cent lower during periods of rotation compared to periods of non-rotation, Blinov et al. (2016) also report a decrease in polarization during rotations. The mean optical flux is 17 per cent lower during a rotation compared with outside rotations and the mean  $\gamma$ -ray flux is 41 per cent lower during a rotation compared with outside a rotation. The lower degree of polarization during a rotation can be interpreted as a difference in the degree of ordering of the magnetic field during a rotation compared with non-rotation. Alternatively it could be evidence for their association with emission features or shocks travelling along helical magnetic field lines (Marscher et al. 2008; Zhang et al. 2016).

## ACKNOWLEDGEMENTS

We would like to thank the reviewer for their careful reading of the paper and constructive comments. HJ is supported by the Science and Technology Facilities Council (STFC) funding and a Royal Astronomical Society grant. TH was supported by the Academy of Finland project number 267324. CMI acknowledges support from the Royal Society, the Wolfson Foundation and the STFC. UBA is partially funded by a CNPq Research Productivity grant number 309606/2013-6 from the Ministry of Science, Technology and Innovation of Brazil. We thank Asaf Pe'er for fruitful discussions during his visit to the ARI, also theoretical discussions with Shihō Kobayashi and Drejc Kopac and statistical discussions with Chris Collins. We also thank Benoit Lott for providing the adaptive binning light-curve analysis code for the *Fermi Gamma-Ray Telescope* data. The Liverpool Telescope is operated on the island of La Palma by Liverpool John Moores University in the Spanish Observato-

rio del Roque de los Muchachos of the Instituto de Astrofísica de Canarias with financial support from the UK STFC.

## REFERENCES

- Abdo A. A. et al., 2010a, *Nature*, 463, 919  
 Abdo A. A. et al., 2010b, *ApJ*, 716, 30  
 Abramowski A. et al., 2013, *A&A*, 554, A107  
 Abramowski A. et al., 2015, *ApJ*, 802, 65  
 Acciari V. A. et al., 2008, *ApJ*, 684, L73  
 Acciari V. A. et al., 2009, *ApJ*, 693, L104  
 Adelman-McCarthy J. K. et al., 2009, *VizieR Online Data Catalog*, 2294, 0  
 Agudo I. et al., 2011, *ApJ*, 726, L13  
 Aharonian F. A., 2000, *New Astron.*, 5, 377  
 Aharonian F. et al., 2006, *A&A*, 448, L19  
 Ahnen et al., 2016a, *MNRAS*, 459, 2286  
 Ahnen et al., 2016b, *A&A*, 590, A24  
 Albert J. et al., 2006a, *ApJ*, 642, L119  
 Albert J. et al., 2006b, *ApJ*, 648, L105  
 Albert J. et al., 2007a, *ApJ*, 654, L119  
 Albert J. et al., 2007b, *ApJ*, 666, L17  
 Albert J. et al., 2008, *ApJ*, 681, 944  
 Aleksić J. et al., 2010, *A&A*, 515, A76  
 Aleksić J. et al., 2011, *ApJ*, 730, L8  
 Aleksić J. et al., 2014a, *A&A*, 567, A41  
 Aleksić J. et al., 2014b, *A&A*, 569, A46  
 Aleksić J. et al., 2015, *MNRAS*, 450, 4399  
 Aliu E. et al., 2009, *ApJ*, 692, L29  
 Anderhub H. et al., 2009, *ApJ*, 704, L129  
 Andruchow I., Combi J. A., Muñoz-Arjonilla A. J., Romero G. E., Cellone S. A., Martí J., 2011, *A&A*, 531, A38  
 Arlen T. et al., 2013, *ApJ*, 762, 92  
 Arnold D. M., Steele I. A., Bates S. D., Mottram C. J., Smith R. J., 2012, *Proc. SPIE*, 8446, 2  
 Atwood W. B. et al., 2009, *ApJ*, 697, 1071  
 Barres de Almeida U., 2011, *Int. Cosm. Ray Conf.*, 8, 79  
 Bertin E., Arnouts S., 1996, *A&AS*, 117, 393  
 Björnsson C.-I., 1982, *ApJ*, 260, 855  
 Blandford R. D., Levinson A., 1995, *ApJ*, 441, 79  
 Blandford R. D., Rees M. J., 1978, *Phys. Scr.*, 17, 265  
 Błażejowski M., Sikora M., Moderski R., Madejski G. M., 2000, *ApJ*, 545, 107  
 Blinov D. et al., 2015, *MNRAS*, 453, 1669  
 Blinov D. et al., 2016, *MNRAS*, 457, 2252  
 Bloom S. D., Marscher A. P., 1996, *ApJ*, 461, 657  
 Böttcher M., Reimer A., Zhang H., 2013, *Eur. Phys. J. Web Conf.*, 61, 5003  
 Bradbury S. M. et al., 1997, *A&A*, 320, L5  
 Bradt H., 2014, *Astrophysics Processes*. Cambridge Univ. Press, Cambridge  
 Burbidge E. M., Kinman T. D., 1966, *ApJ*, 145, 654  
 Burbidge E. M., Rosenberg F. D., 1965, *ApJ*, 142, 1673  
 Clarke D., Neumayer D., 2002, *A&A*, 383, 360  
 Cohen D. P., Romani R. W., Filippenko A. V., Cenko S. B., Lott B., Zheng W., Li W., 2014, *ApJ*, 797, 137  
 Costamante L. et al., 2001, *A&A*, 371, 512  
 D'arcangelo F. D. et al., 2009, *ApJ*, 697, 985  
 Danforth C. W., Keeney B. A., Stocke J. T., Shull J. M., Yao Y., 2010, *ApJ*, 720, 976  
 Danforth C. W., Nalewajko K., France K., Keeney B. A., 2013, *ApJ*, 764, 57  
 de Vaucouleurs G., de Vaucouleurs A., Corwin H. G., Jr, Buta R. J., Paturel G., Fouqué P., 1991, *Third Reference Catalogue of Bright Galaxies*, Vol. I: Explanations and references. Vol. II: Data for galaxies between  $0^h$  and  $12^h$ . Vol. III: Data for galaxies between  $12^h$  and  $24^h$ . Springer, New York  
 Dermer C. D., Schlickeiser R., 1993, *ApJ*, 416, 458  
 Dermer C. D., Schlickeiser R., Mastichiadis A., 1992, *A&A*, 256, L27  
 Dermer C. D., Sturmer S. J., Schlickeiser R., 1997, *ApJS*, 109, 103



- Falco E. E. et al., 1999, *PASP*, 111, 438
- Furniss A., Fumagalli M., Danforth C., Williams D. A., Prochaska J. X., 2013, *ApJ*, 766, 35
- Georganopoulos M., Kazanas D., 2003, *ApJ*, 594, L27
- Ghisellini G., Madau P., 1996, *MNRAS*, 280, 67
- Ghisellini G., Tavecchio F., 2008, *MNRAS*, 386, L28
- Ghisellini G., Tavecchio F., Foschini L., Ghirlanda G., 2011, *MNRAS*, 414, 2674
- Hagen-Thorn V. A., Larionov V. M., Jorstad S. G., Larionova E. G., 2002a, *AJ*, 124, 3031
- Hagen-Thorn V. A., Larionova E. G., Jorstad S. G., Björnsson C.-I., Larionov V. M., 2002b, *A&A*, 385, 55
- Hagen-Thorn V. A., Marchenko S. G., Smekhacheva R. I., Iakovleva V. A., 1983, *Astrofizika*, 19, 199
- Hartman R. C. et al., 1992, *ApJ*, 385, L1
- Holmes P. A. et al., 1984, *MNRAS*, 211, 497
- Horan D. et al., 2002, *ApJ*, 571, 753
- Hovatta T. et al., 2014, *MNRAS*, 439, 690
- Ikejiri Y. et al., 2011, *PASJ*, 63, 639
- Impey C. D., Bychkov V., Tapia S., Gnedin Y., Pustilnik S., 2000, *AJ*, 119, 1542
- Itoh R. et al., 2013, *PASJ*, 65, 18
- Jannuzi B. T., Smith P. S., Elston R., 1994, *ApJ*, 428, 130
- Jermak H., 2016, PhD thesis, Liverpool John Moores University
- Jones T. W., Rudnick L., Aller H. D., Aller M. F., Hodge P. E., Fiedler R. L., 1985, *ApJ*, 290, 627
- Joshi U. C., Baliyan K. S., Ganesh S., Deshpande M. R., Bhattacharyya S., Kaul R. K., Kaul C. L., Bhat C. L., 2000, *Bull. Astron. Soc. India*, 28, 409
- Kiehlmann S. et al., 2013, *Eur. Phys. J. Web Conf.*, 61, 6003
- Kikuchi S., Mikami Y., Inoue M., Tabara H., Kato T., 1988, *A&A*, 190, L8
- Kormendy J., Richstone D., 1995, *ARA&A*, 33, 581
- Landi Degl'Innocenti E., Bagnulo S., Fossati L., 2007, in Sterken C., ed., *ASP Conf. Ser. Vol. 364, The Future of Photometric, Spectrophotometric and Polarimetric Standardization*. Astron. Soc. Pac., San Francisco, p. 495
- Larionov V. M. et al., 2008a, *A&A*, 492, 389
- Larionov V., Konstantinova T., Kopatskaya E., Larionova L., Efimova N., Blinov D., Melnichuk D., Troitsky I., 2008b, *Astron. Telegram*, 1502, 1
- Lorenz E., Martinez M., 2005, *Astron. Geophys.*, 46, 6.21
- Lott B., Escande L., Larsson S., Ballet J., 2012, *A&A*, 544, A6
- Magorrian J. et al., 1998, *AJ*, 115, 2285
- Mannheim K., Biermann P. L., 1992, *A&A*, 253, L21
- Maraschi L., Ghisellini G., Celotti A., 1992, *ApJ*, 397, L5
- Marcha M. J. M., Browne I. W. A., Impey C. D., Smith P. S., 1996, *MNRAS*, 281, 425
- Marscher A. P., 2014, *ApJ*, 780, 87
- Marscher A. P., Gear W. K., 1985, *ApJ*, 298, 114
- Marscher A. P. et al., 2008, *Nature*, 452, 966
- Marscher A. P. et al., 2010, *ApJ*, 710, L126
- Mawson N. R., Steele I. A., Smith R. J., 2013, *Astron. Nachr.*, 334, 729
- Monet D. G. et al., 2003, *AJ*, 125, 984
- Mücke A., Protheroe R. J., 2001, *Astropart. Phys.*, 15, 121
- Mücke A., Protheroe R. J., Engel R., Rachen J. P., Stanev T., 2003, *Astropart. Phys.*, 18, 593
- Naghizadeh-Khouei J., Clarke D., 1993, *A&A*, 274, 968
- Nalewajko K., 2010, *Int. J. Mod. Phys. D*, 19, 701
- Nilsson K., Pursimo T., Sillanpää A., Takalo L. O., Lindfors E., 2008, *A&A*, 487, L29
- Nolan P. L. et al., 2012, *ApJS*, 199, 31
- Petry D. et al., 2000, *ApJ*, 536, 742
- Pirola V., Berdyugin A., Mikkola S., Coyne G. V., 2005, *ApJ*, 632, 576
- Punch M. et al., 1992, *Nature*, 358, 477
- Quinn J. et al., 1996, *ApJ*, 456, L83
- Raiteri C. M. et al., 2013, *MNRAS*, 436, 1530
- Robbins M., Hadwen B., 2003, *IEEE Trans. Electron Devices*, 50, 1227
- Rügamer S. et al., 2011, preprint ([arXiv:e-prints](https://arxiv.org/abs/1108.1711))
- Schmidt G. D., Elston R., Lupie O. L., 1992, *AJ*, 104, 1563
- Seta H. et al., 2009, *PASJ*, 61, 1011
- Sikora M., Begelman M. C., Rees M. J., 1994, *ApJ*, 421, 153
- Sillanpää A., Haarala S., Valtonen M. J., Sundelius B., Byrd G. G., 1988, *ApJ*, 325, 628
- Simmons J. F. L., Stewart B. G., 1985, *A&A*, 142, 100
- Sorcía M., Benítez E., Hiriart D., López J. M., Cabrera J. I., Mújica R., 2014, *ApJ*, 794, 54
- Steele I. A., Bates S. D., Guidorzi C., Mottram C. J., Mundell C. G., Smith R. J., 2010, *Proc. SPIE*, 7735, 49
- Takalo L. O., Sillanpää A., 1993, *Ap&SS*, 206, 191
- Tavecchio F., Maraschi L., Ghisellini G., 1998, *ApJ*, 509, 608
- Tosti G. et al., 1998a, *A&AS*, 130, 109
- Tosti G. et al., 1998b, *A&A*, 339, 41
- Tosti G., Massaro E., Takalo L. O., Villata M., Efimov Y., 1999, in Takalo L. O., Sillanpää A., eds, *ASP Conf. Ser. Vol. 159, BL Lac Phenomenon*. Astron. Soc. Pac., San Francisco, p. 149
- Turnshek D. A., Bohlin R. C., Williamson, II R. L., Lupie O. L., Koornneef J., Morgan D. H., 1990, *AJ*, 99, 1243
- Uemura M. et al., 2010, *PASJ*, 62, 69
- Ulrich M.-H., Kinman T. D., Lynds C. R., Rieke G. H., Ekers R. D., 1975, *ApJ*, 198, 261
- Urry C. M., 2000, in Holt S. S., Zhang W. W., eds, *AIP Conf. Ser. Vol. 522, Cosmic Explosions: Tenth Astrophys. Conf. Am. Inst. Phys.*, New York, p. 299
- Urry C. M., Padovani P., 1995, *PASP*, 107, 803
- Vermeulen R. C., Ogle P. M., Tran H. D., Browne I. W. A., Cohen M. H., Readhead A. C. S., Taylor G. B., Goodrich R. W., 1995, *ApJ*, 452, L5
- Veron-Cetty M.-P., Veron P., 2006, *VizieR Online Data Catalog*, 7248, 0
- Villforth C., Nilsson K., Østensen R., Heidt J., Niemi S.-M., Pforr J., 2009, *MNRAS*, 397, 1893
- Villforth C. et al., 2010, *MNRAS*, 402, 2087
- Weistrop D., Shaffer D. B., Hintzen P., Romanishin W., 1985, *ApJ*, 292, 614
- Wills B. J., Wills D., Breger M., 2011, *ApJS*, 194, 19
- Young A., 2010, *Nature*, 463, 886
- Zhang H., Chen X., Böttcher M., 2014, *ApJ*, 789, 66
- Zhang H., Deng W., Li H., Böttcher M., 2016, *ApJ*, 817, 63

## APPENDIX A

In Figs A1–A15, we present the light curves from the RINGO2 period of monitoring. Along with the light curves we discuss the historical behaviour of the sources and how this relates or differs from the RINGO2 observations. The four windows show (from top to bottom) *Fermi*  $\gamma$ -ray data, optical EVPA, optical degree of polarization and optical flux density. In the *Fermi* window the areas of rotations are shown (pink for upwards rotation, green for downwards rotation), along with the areas that lack corresponding optical polarization data (grey) and the *Fermi* flares (blue) identified using the automated code. For the core sample of eight sources along with Mrk 421 a large quantity of polarimetric observations are available in the literature. We have reviewed observations from catalogues as well as papers dedicated to single sources and compare our data with the historical behaviour. We describe the  $\gamma$ -ray emission as High Energy (HE:  $E > 100$  MeV) or Very High Energy (VHE:  $E > 100$  GeV) regimes.

**Table A1.** Full table of Spearman Rank Correlation results ( $\rho$  and p value) for all sources and all seasons. Empty fields represent sources that were not observed in that season or lack one of the data sets required for that analysis and for the optical magnitude and degree of polarization values there is only one for each source as the data were not split into seasons (see Section 4.1.3 for more details).

| Source/Season | MJD range         | $\rho$ (gam-mag) | $\rho$ (gam-deg) | $\rho$ (deg-mag) | p (gam-mag)            | p (gam-deg)            | p (deg-mag)            |
|---------------|-------------------|------------------|------------------|------------------|------------------------|------------------------|------------------------|
| 3C66A         |                   |                  |                  |                  |                        |                        |                        |
| a             | <55300            | 0.508            | -0.287           | 0.299            | $7.30 \times 10^{-6}$  | 0.0659                 | 0.00941                |
| b             | >55300 and <55700 | 0.0670           | -0.400           | ...              | 0.524                  | 0.000668               | ...                    |
| c             | >55700 and <56100 | 0.119            | 0.114            | ...              | 0.287                  | 0.261                  | ...                    |
| d             | >56100            | 0.491            | 0.188            | ...              | 0.154                  | 0.608                  | ...                    |
| S50716+714    |                   |                  |                  |                  |                        |                        |                        |
| a             | <55000            | 0.480            | -0.0129          | -0.0754          | $9.94 \times 10^{-6}$  | 0.946                  | 0.759                  |
| b             | >55000 and <55400 | 0.523            | 0.411            | ...              | $2.54 \times 10^{-5}$  | 0.101                  | ...                    |
| c             | >55400 and <55800 | 0.127            | 0.272            | ...              | 0.302                  | 0.0108                 | ...                    |
| d             | >55800            | 0.586            | -0.0324          | ...              | $1.83 \times 10^{-6}$  | 0.758                  | ...                    |
| OJ287         |                   |                  |                  |                  |                        |                        |                        |
| a             | <55000            | 0.493            | -0.230           | 0.000547         | $3.41 \times 10^{-6}$  | 0.177                  | 0.999                  |
| b             | >55000 and <55400 | 0.565            | -0.235           | ...              | $3.75 \times 10^{-6}$  | 0.331                  | ...                    |
| c             | >55400 and <55800 | -0.304           | 0.351            | ...              | 0.0153                 | 0.120                  | ...                    |
| d             | >55800            | 0.470            | 0.0126           | ...              | $1.54 \times 10^{-4}$  | 0.925                  | ...                    |
| 1ES1011+496   |                   |                  |                  |                  |                        |                        |                        |
| a             | >56000            | ...              | ...              | 0.500            | ...                    | ...                    | 0.0191                 |
| Mrk421        |                   |                  |                  |                  |                        |                        |                        |
| a             | >55800 and <55150 | 0.577            | 0.0649           | 0.0933           | $2.2 \times 10^{-16}$  | 0.296                  | 0.133                  |
| Mrk180        |                   |                  |                  |                  |                        |                        |                        |
| a             | <56025            | ...              | ...              | 0.429            | ...                    | ...                    | 0.419                  |
| 1ES1218+304   |                   |                  |                  |                  |                        |                        |                        |
| a             | >56050            | ...              | ...              | 0.111            | ...                    | ...                    | 0.695                  |
| ON231         |                   |                  |                  |                  |                        |                        |                        |
| a             | <55100            | 0.0860           | 0.130            | 0.395            | 0.506                  | 0.455                  | $1.53 \times 10^{-11}$ |
| b             | >55100 and <55500 | 0.297            | 0.126            | ...              | 0.0660                 | 0.683                  | ...                    |
| c             | >55500 and <55800 | 0.635            | -0.560           | ...              | $1.64 \times 10^{-4}$  | 0.00830                | ...                    |
| d             | >55800            | 0.708            | -0.305           | ...              | $7.43 \times 10^{-5}$  | 0.178                  | ...                    |
| PKS1222+216   |                   |                  |                  |                  |                        |                        |                        |
| a             | <55800            | 0.0303           | ...              | 0.245            | 0.946                  | ...                    | 0.342                  |
| b             | >55800            | -0.600           | -0.199           | ...              | $8.23 \times 10^{-6}$  | 0.174                  | ...                    |
| 3C279         |                   |                  |                  |                  |                        |                        |                        |
| a             | <55100            | 0.711            | -0.249           | 0.270            | 0.000                  | 0.263                  | 0.0607                 |
| b             | >55100 and <55500 | 0.376            | ...              | ...              | 0.0238                 | ...                    | ...                    |
| c             | >55500 and <55800 | 0.697            | -0.0197          | ...              | $6.54 \times 10^{-9}$  | 0.912                  | ...                    |
| d             | >55800            | 0.489            | 0.556            | ...              | 0.00525                | $1.52 \times 10^{-6}$  | ...                    |
| 1ES1426       |                   |                  |                  |                  |                        |                        |                        |
| a             | <56120            | ...              | ...              | 0.105            | ...                    | ...                    | 0.518                  |
| PKS1510-089   |                   |                  |                  |                  |                        |                        |                        |
| a             | <55100            | 0.669            | 0.360            | 0.0986           | $3.67 \times 10^{-12}$ | 0.0248                 | 0.486                  |
| b             | >55100 and <55500 | 0.00339          | ...              | ...              | 0.988                  | ...                    | ...                    |
| c             | >55500 and <55900 | 0.554            | -0.0277          | ...              | $4.51 \times 10^{-7}$  | 0.817                  | ...                    |
| d             | >55900            | 0.565            | 0.362            | ...              | $1.17 \times 10^{-8}$  | $3.91 \times 10^{-5}$  | ...                    |
| PG1553+113    |                   |                  |                  |                  |                        |                        |                        |
| a             | <55100            | 0.180            | 0.419            | 0.549            | 0.435                  | 0.419                  | $1.98 \times 10^{-5}$  |
| b             | >55100 and <55500 | 0.745            | ...              | ...              | $2.34 \times 10^{-6}$  | ...                    | ...                    |
| c             | >55500 and <55900 | 0.0718           | ...              | ...              | 0.620                  | ...                    | ...                    |
| d             | >55900            | 0.502            | 0.633            | ...              | $5.60 \times 10^{-16}$ | $1.89 \times 10^{-13}$ | ...                    |
| Mrk501        |                   |                  |                  |                  |                        |                        |                        |
| a             | <55900            | 0.109            | -0.121           | 0.0876           | 0.262                  | 0.235                  | 0.403                  |
| b             | >55900            | -0.0929          | 0.160            | ...              | 0.152                  | 0.0288                 | ...                    |
| BL Lac        |                   |                  |                  |                  |                        |                        |                        |
| a             | <55300            | 0.287            | -0.210           | -0.485           | 0.000493               | 0.0627                 | $1.50 \times 10^{-6}$  |
| b             | >55300 and <55650 | 0.680            | 0.0168           | ...              | $4.97 \times 10^{-11}$ | 0.900                  | ...                    |
| c             | >55650 and <55990 | 0.548            | -0.205           | ...              | $1.71 \times 10^{-5}$  | 0.0719                 | ...                    |
| d             | >55990            | 0.718            | 0.143            | ...              | $3.66 \times 10^{-8}$  | 0.803                  | ...                    |

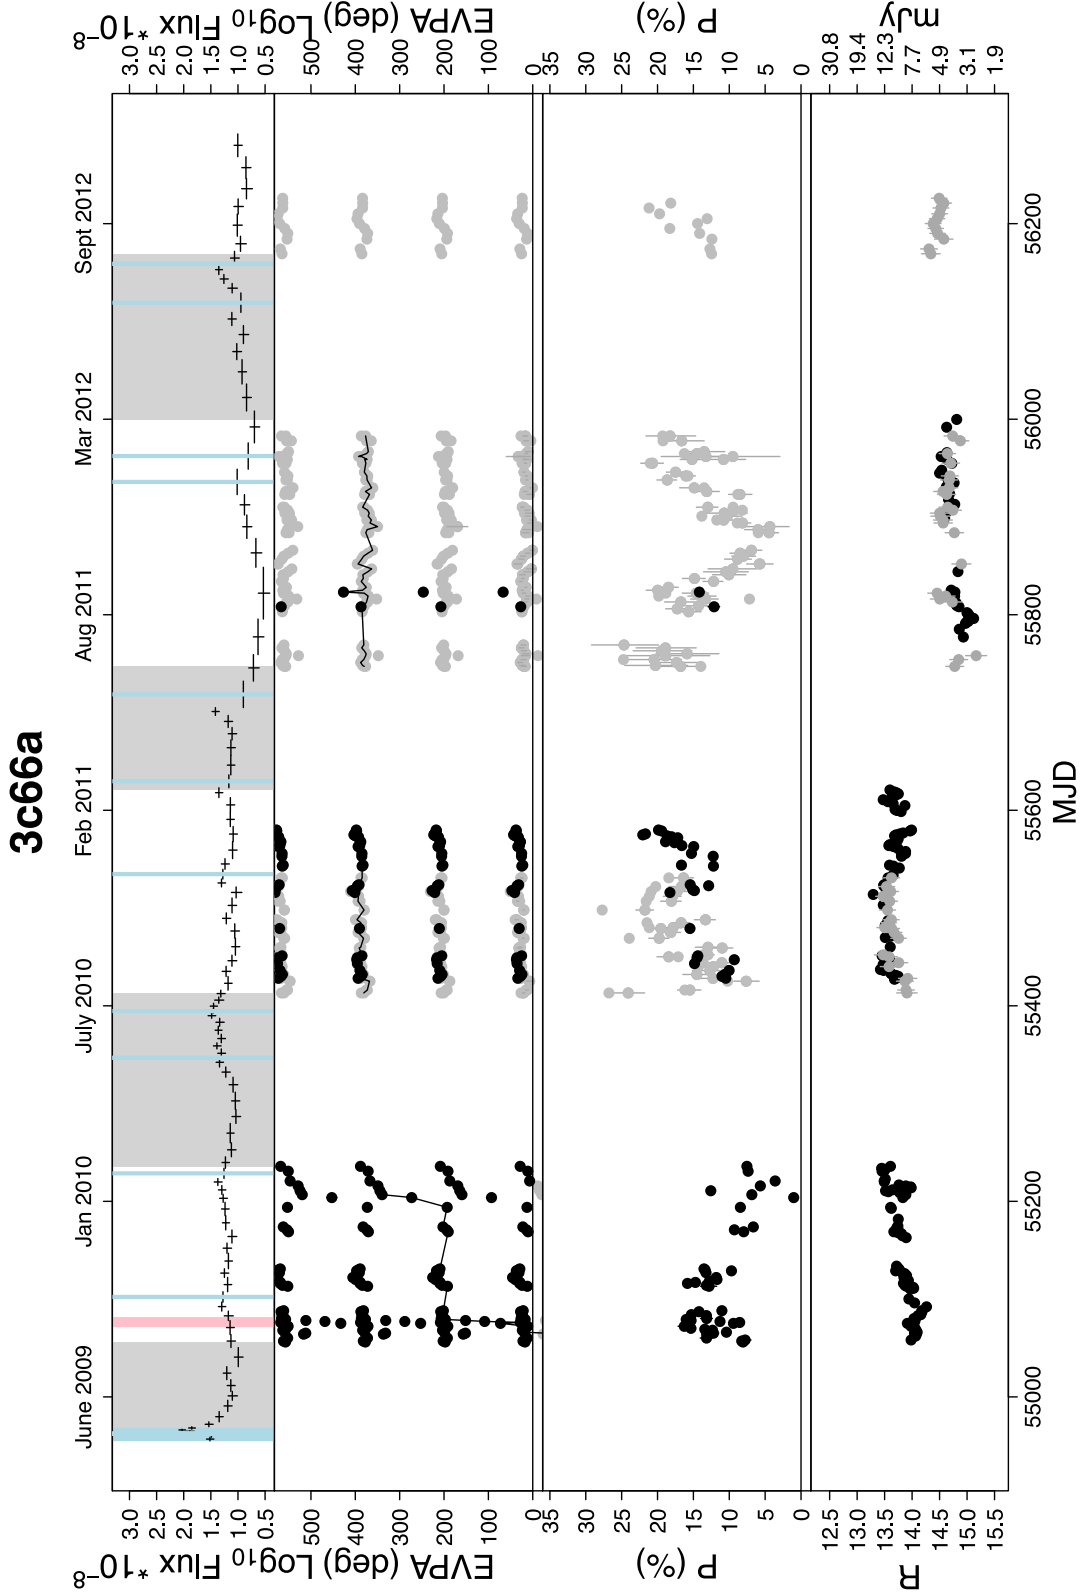

**Figure A1.** All  $\gamma$ -ray and optical data for 3C 66A. Top panel shows the *Fermi*  $\gamma$ -ray light curve. The errors on the x-axis represent the bins used for the *Fermi* data. Grey vertical sections show periods where no synchronous optical data available, pink vertical sections highlight regions where optical polarization angle rotations occur in the upwards direction, light green sections show downwards rotations. Flaring episodes are identified by vertical blue lines (see Section 2.3.1 for definition of a flare). The second panel shows the optical polarization angle or EVPA, the grey points are RINGO2 data and the black points KVA-DIPOL data. The black line traces the temporally closest EVPA points, showing the most likely behaviour of the EVPA. The third panel shows the optical degree of polarization, and the fourth panel the optical magnitude, all point colours are the same as those for panel 2.

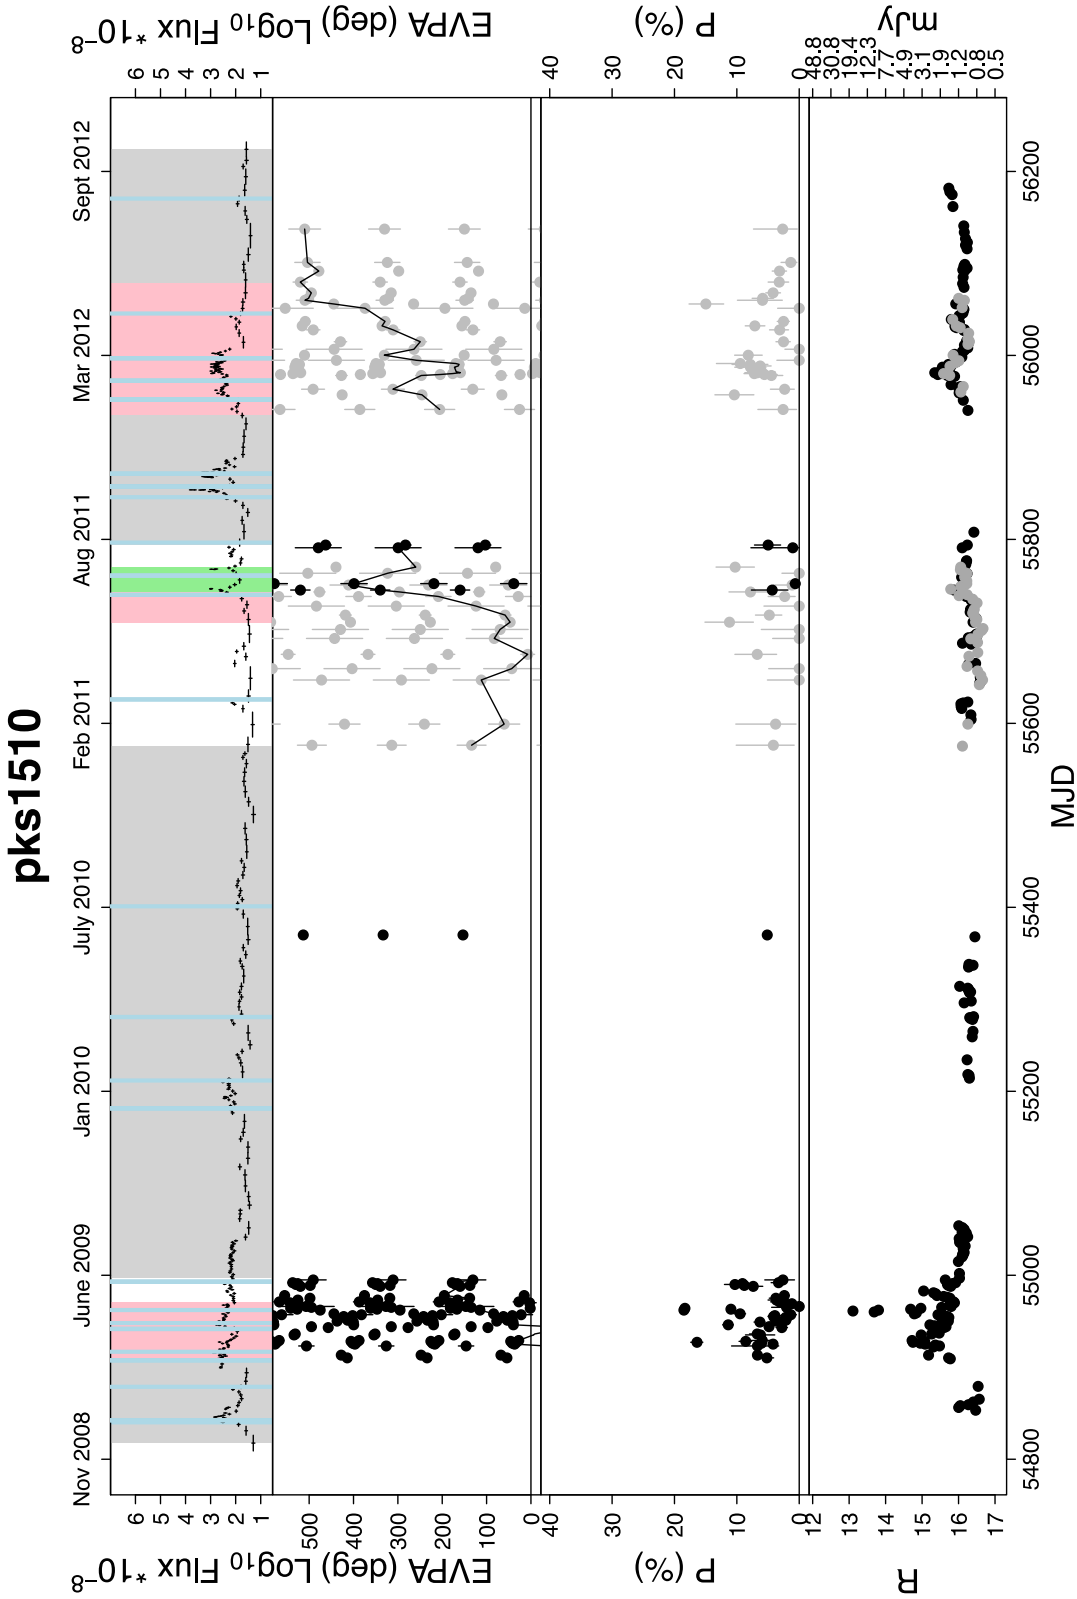

**Figure A2.** All  $\gamma$ -ray and optical data for PKS 1510-089. Top panel shows the *Fermi*  $\gamma$ -ray light curve. The errors on the  $x$ -axis represent the bins used for the *Fermi* data. Grey vertical sections show periods where no synchronous optical data available, pink vertical sections highlight regions where optical polarization angle rotations occur in the upwards direction, light green sections show downwards rotations. Flaring episodes are identified by vertical blue lines (see Section 2.3.1 for definition of a flare). The second panel shows the optical polarization angle or EVPA, the grey points are RINGO2 data and the black points KVA-DIPOL data. The black line traces the temporally closest EVPA points, showing the most likely behaviour of the EVPA. The third panel shows the optical degree of polarization, and the fourth panel the optical magnitude, all point colours are the same as those for panel 2.

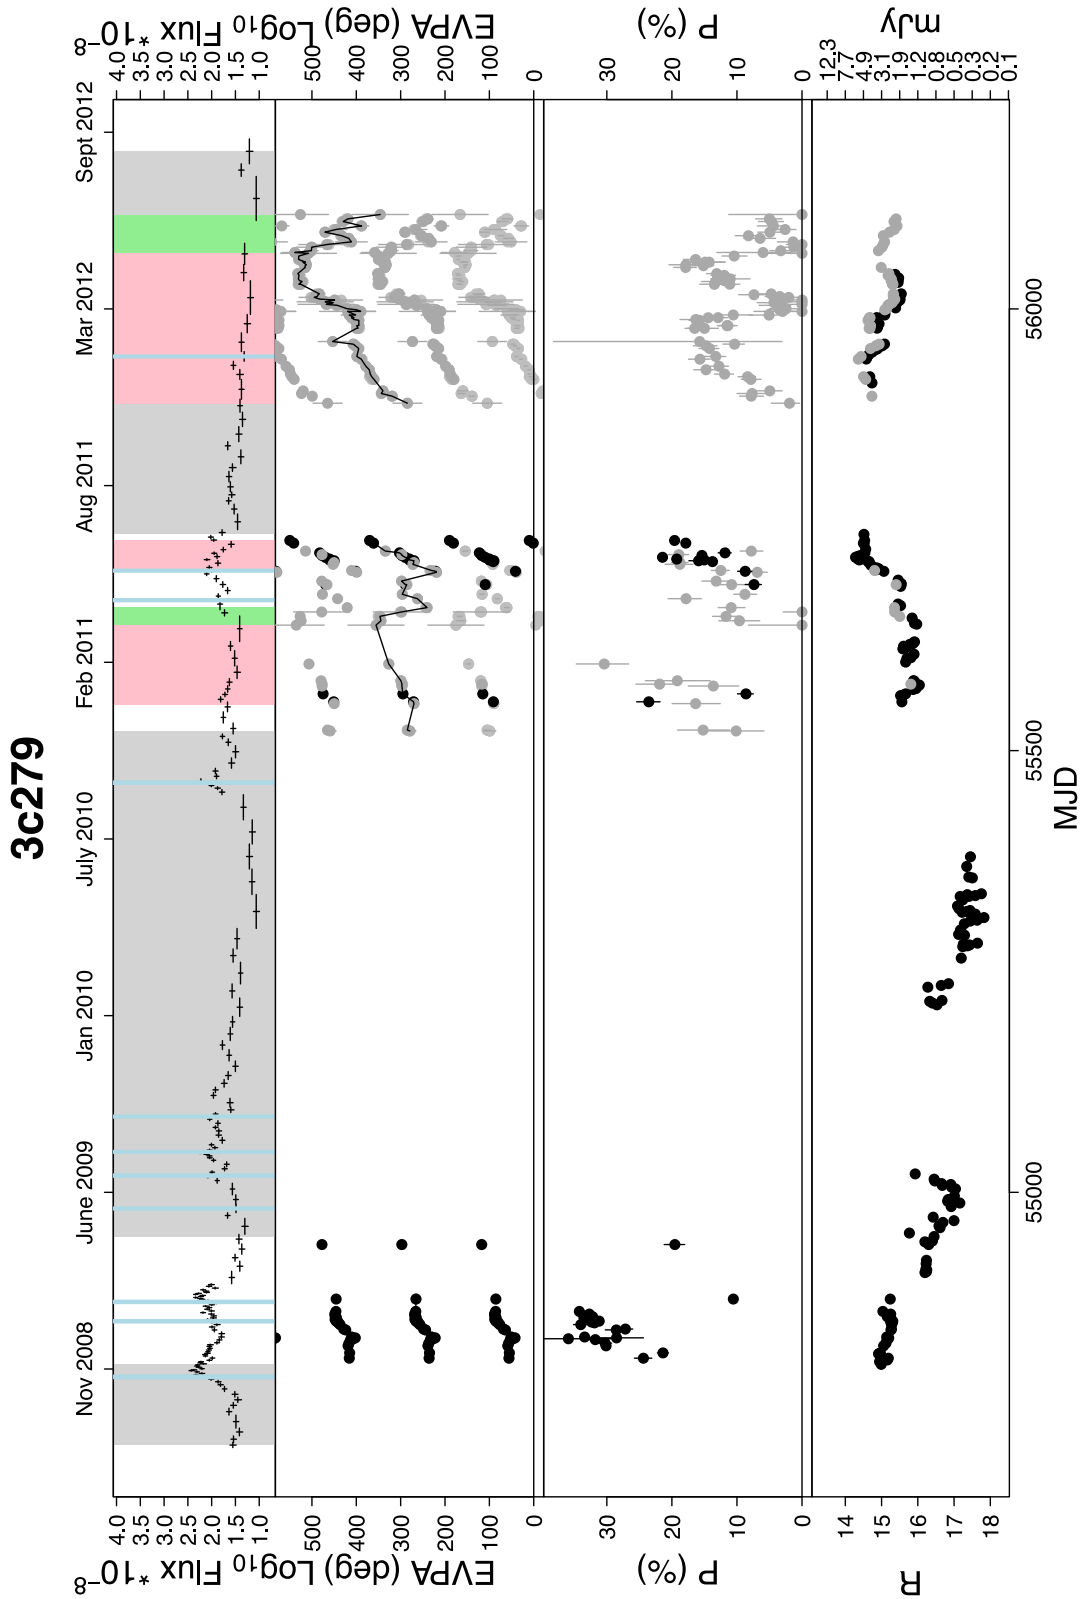

**Figure A3.** All  $\gamma$ -ray and optical data for 3C 279. Top panel shows the *Fermi*  $\gamma$ -ray light curve. The errors on the x-axis represent the bins used for the *Fermi* data. Grey vertical sections show periods where no synchronous optical data available, pink vertical sections highlight regions where optical polarization angle rotations occur in the upwards direction, light green sections show downwards rotations. Flaring episodes are identified by vertical blue lines (see Section 2.3.1 for definition of a flare). The second panel shows the optical polarization angle or EVPA, the grey points are RINGO2 data and the black points KVA-DIPOL data. The black line traces the temporally closest EVPA points, showing the most likely behaviour of the EVPA. The third panel shows the optical degree of polarization, and the fourth panel the optical magnitude, all point colours are the same as those for panel 2.

**oj287**

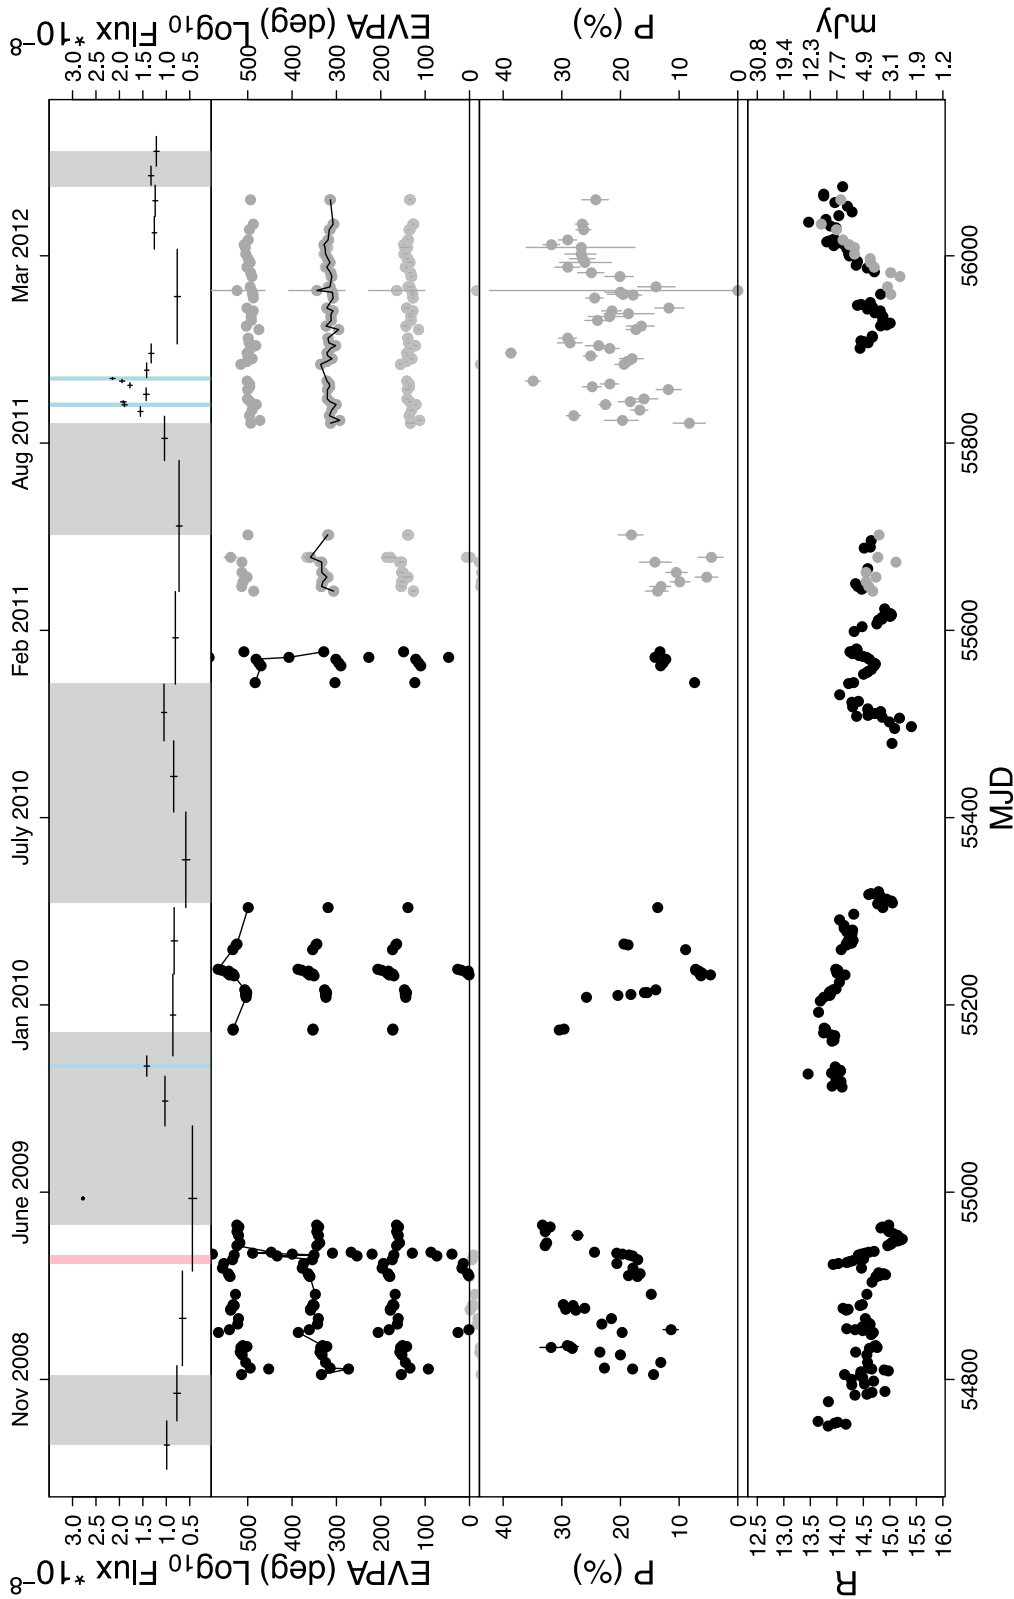

**Figure A4.** All  $\gamma$ -ray and optical data for OJ287. Top panel shows the *Fermi*  $\gamma$ -ray light curve. The errors on the  $x$ -axis represent the bins used for the *Fermi* data. Grey vertical sections show periods where no synchronous optical data available, pink vertical sections highlight regions where optical polarization angle rotations occur in the upwards direction, light green sections show downwards rotations. Flaring episodes are identified by vertical blue lines (see Section 2.3.1 for definition of a flare). The second panel shows the optical polarization angle or EVPA, the grey points are RINGO2 data and the black points KVA-DIPOL data. The black line traces the temporally closest EVPA points, showing the most likely behaviour of the EVPA. The third panel shows the optical degree of polarization, and the fourth panel the optical magnitude, all point colours are the same as those for panel 2.

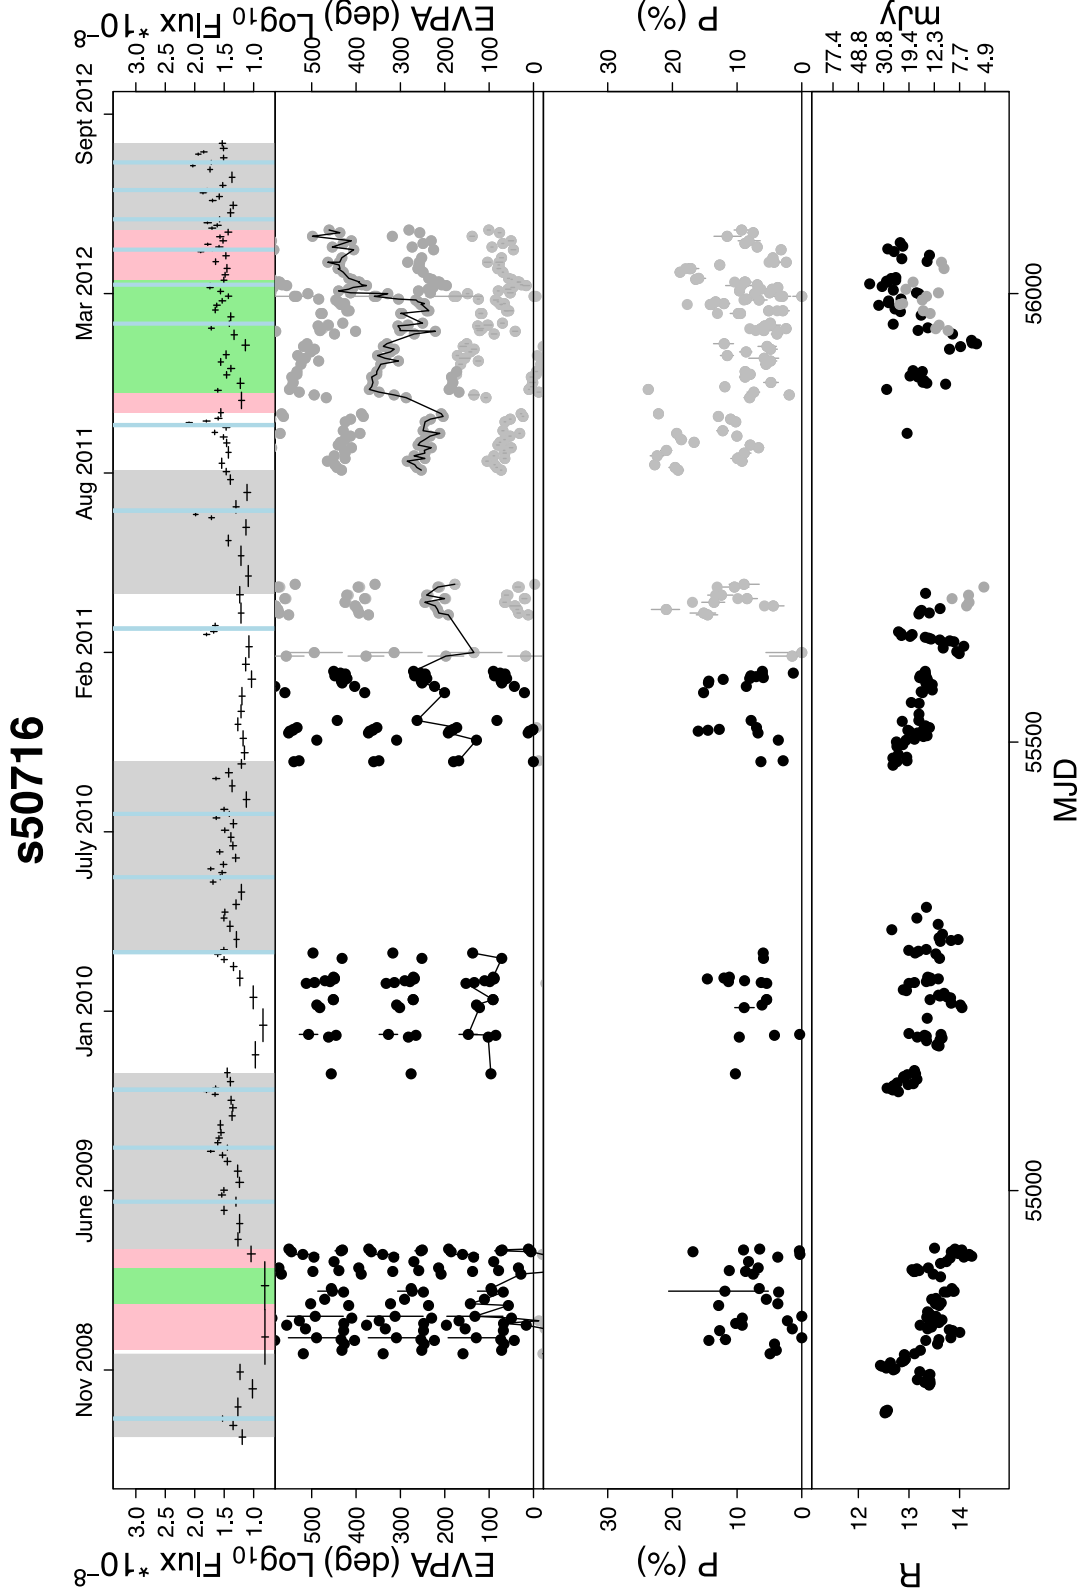

**Figure A5.** All  $\gamma$ -ray and optical data for S5 0716. Top panel shows the *Fermi*  $\gamma$ -ray light curve. The errors on the x-axis represent the bins used for the *Fermi* data. Grey vertical sections show periods where no synchronous optical data available, pink vertical sections highlight regions where optical polarization angle rotations occur in the upwards direction, light green sections show downwards rotations. Flaring episodes are identified by vertical blue lines (see Section 2.3.1 for definition of a flare). The second panel shows the optical polarization angle or EVPA, the grey points are RINGO2 data and the black points KVA-DIPOL data. The black line traces the temporally closest EVPA points, showing the most likely behaviour of the EVPA. The third panel shows the optical degree of polarization, and the fourth panel the optical magnitude, all point colours are the same as those for panel 2.

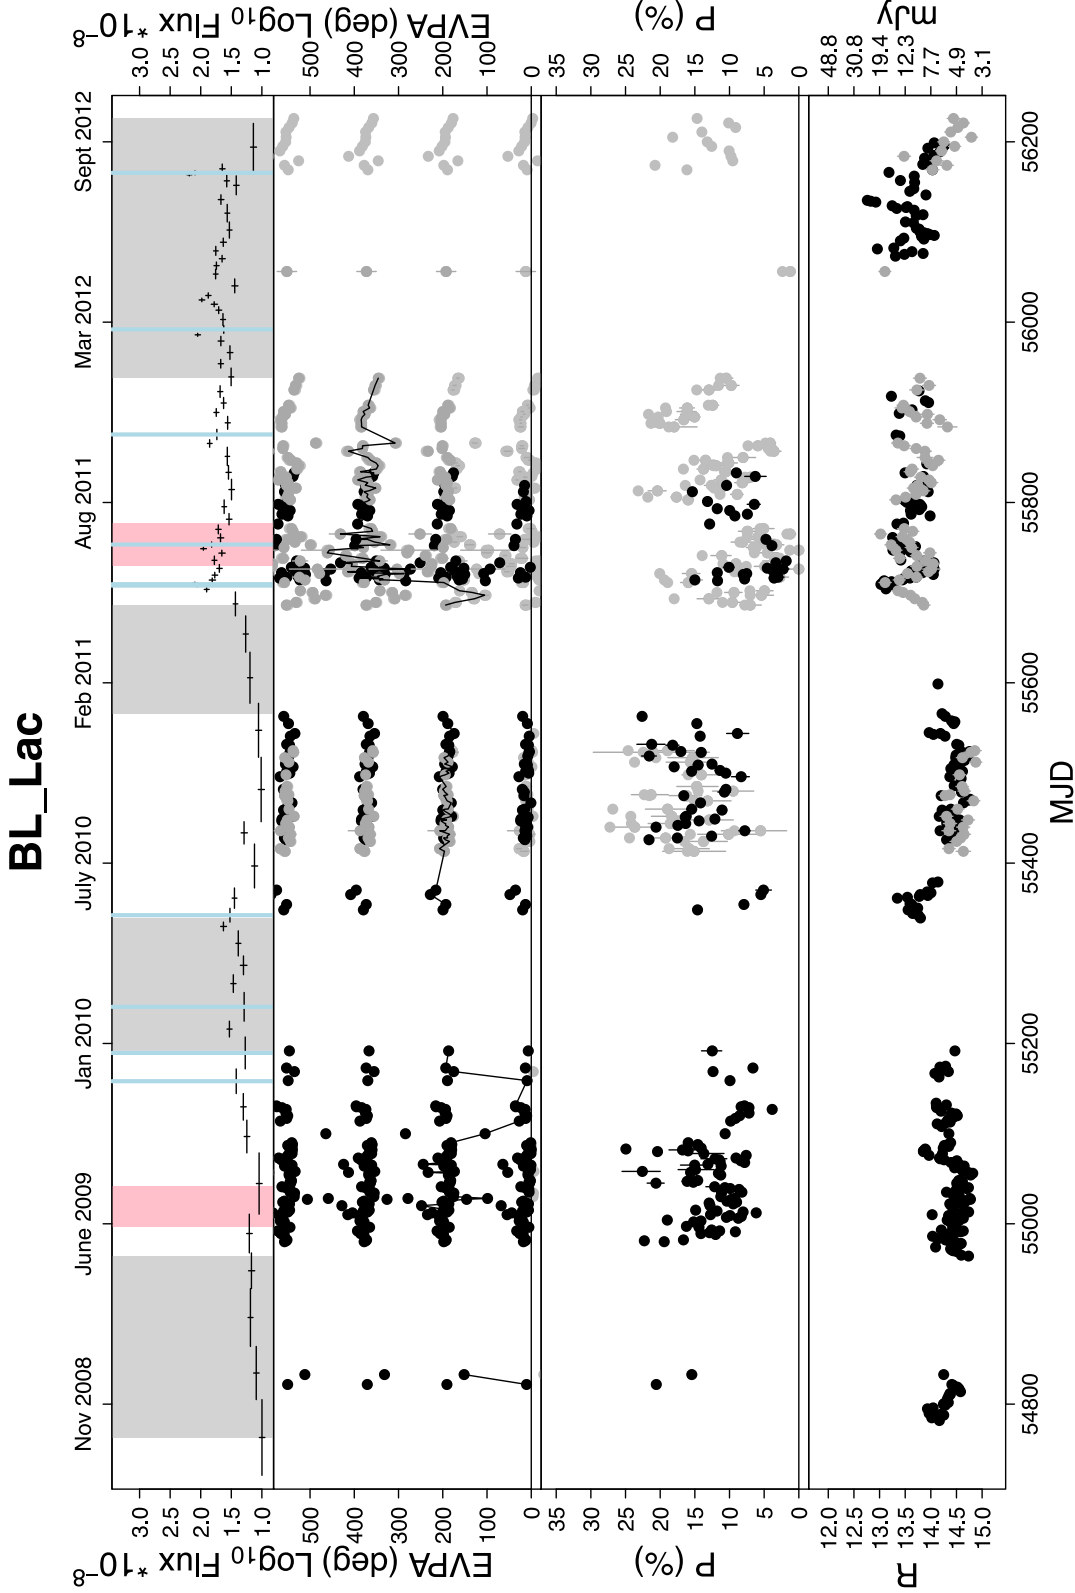

**Figure A6.** All  $\gamma$ -ray and optical data for BL Lac. Top panel shows the  $Fermi$   $\gamma$ -ray light curve. The errors on the x-axis represent the bins used for the  $Fermi$  data. Grey vertical sections show periods where no synchronous optical data are available, pink vertical sections highlight regions where optical polarization angle rotations occur in the upwards direction, light green sections show downwards rotations. Flaring episodes are identified by vertical blue lines (see Section 2.3.1 for definition of a flare). The second panel shows the optical polarization angle or EVPA, the grey points are RINGO2 data and the black points KVA-DIPOL data. The black line traces the temporally closest EVPA points, showing the most likely behaviour of the EVPA. The third panel shows the optical degree of polarization, and the fourth panel the optical magnitude, all point colours are the same as those for panel 2.



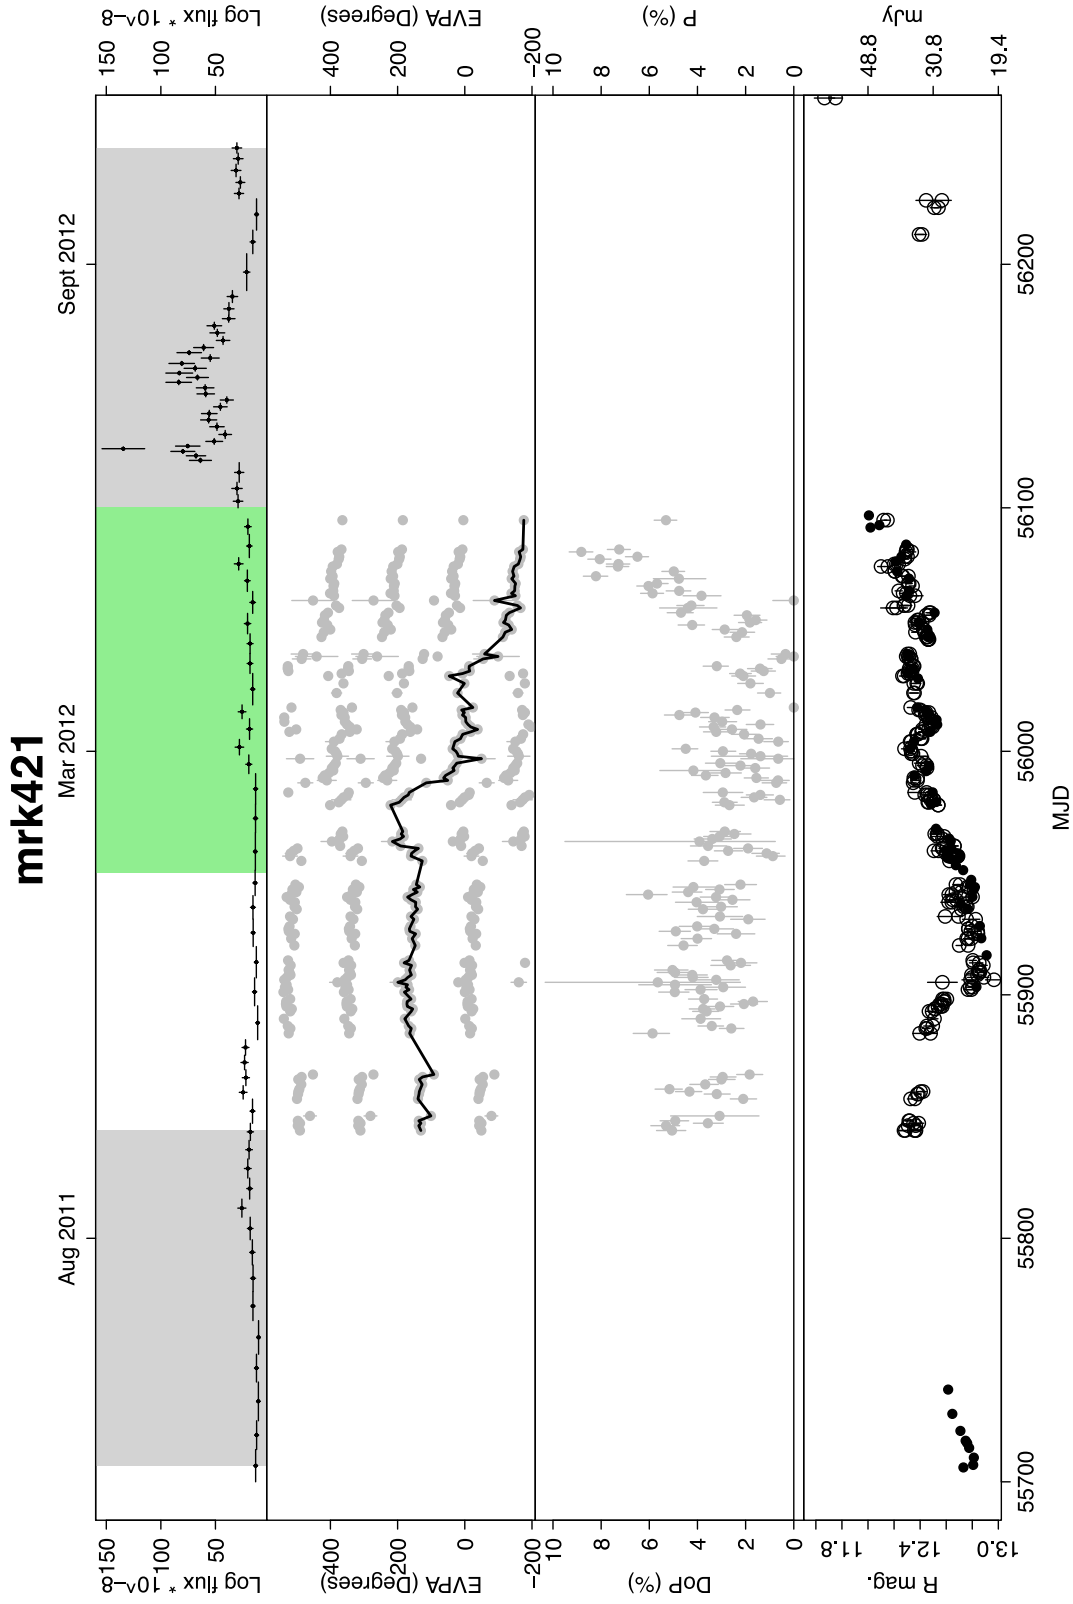

**Figure A7.** All  $\gamma$ -ray and optical data for 3Mrk 421. Top panel shows the *Fermi*  $\gamma$ -ray light curve. The errors on the x-axis represent the bins used for the *Fermi* data. Grey vertical sections show periods where no synchronous optical data are available, the green vertical section highlights the region where the optical polarization angle rotates in the downwards direction. Flaring episodes are identified by vertical blue lines (see Section 2.3.1 for definition of a flare). The second panel shows the optical polarization angle or EVPA, the grey points are RINGO2 data and no KVA-DIPOL data are available. The black line traces the temporally closest EVPA points, showing the most likely behaviour of the EVPA. The third panel shows the optical degree of polarization (again no KVA-DIPOL data are available), and the fourth panel shows the optical magnitude; photometric calibration of the RINGO2 data was not possible due to the lack of suitable secondary stars in the frame, we instead present SkyCamZ data (open circles) to complement the KVA-DIPOL data.

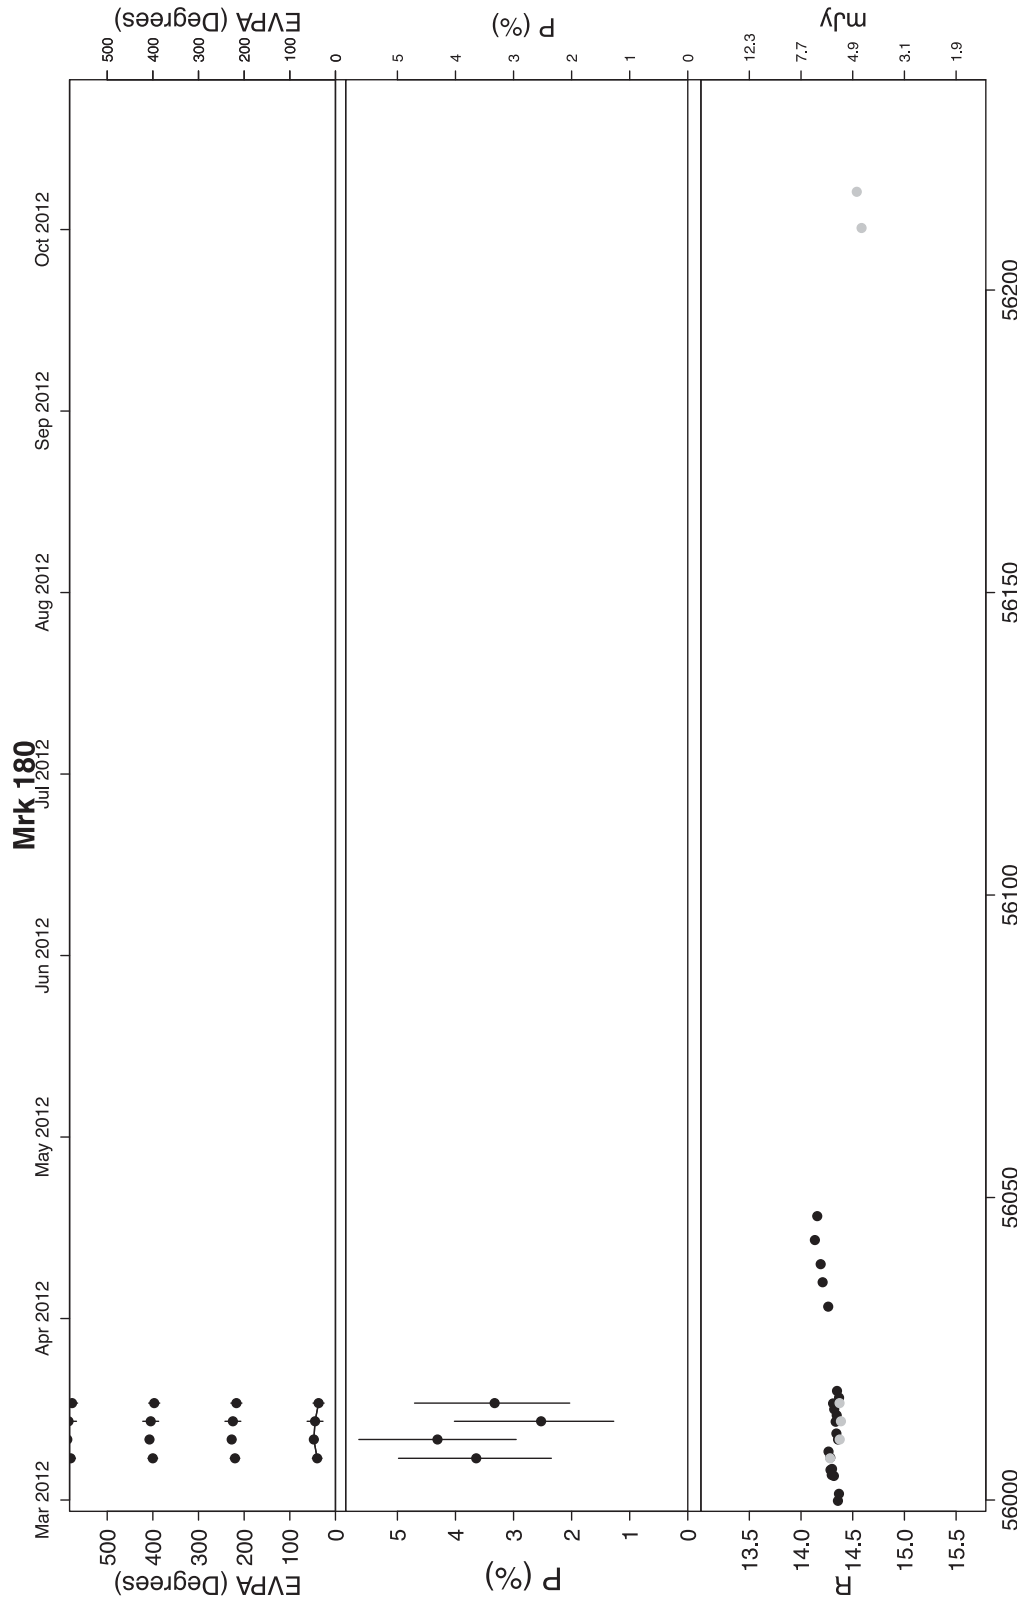

**Figure A8.** All optical data for Mrk 180 (the source is too faint in *Fermi* data). Top panel shows the optical polarization angle or EVPA, the grey points are RINGO2 data and there are no polarization data points from KVA-DIPOL. The second panel shows the optical degree of polarization, and the third panel shows the optical magnitude, all point colours are the same as those for Fig. A7.

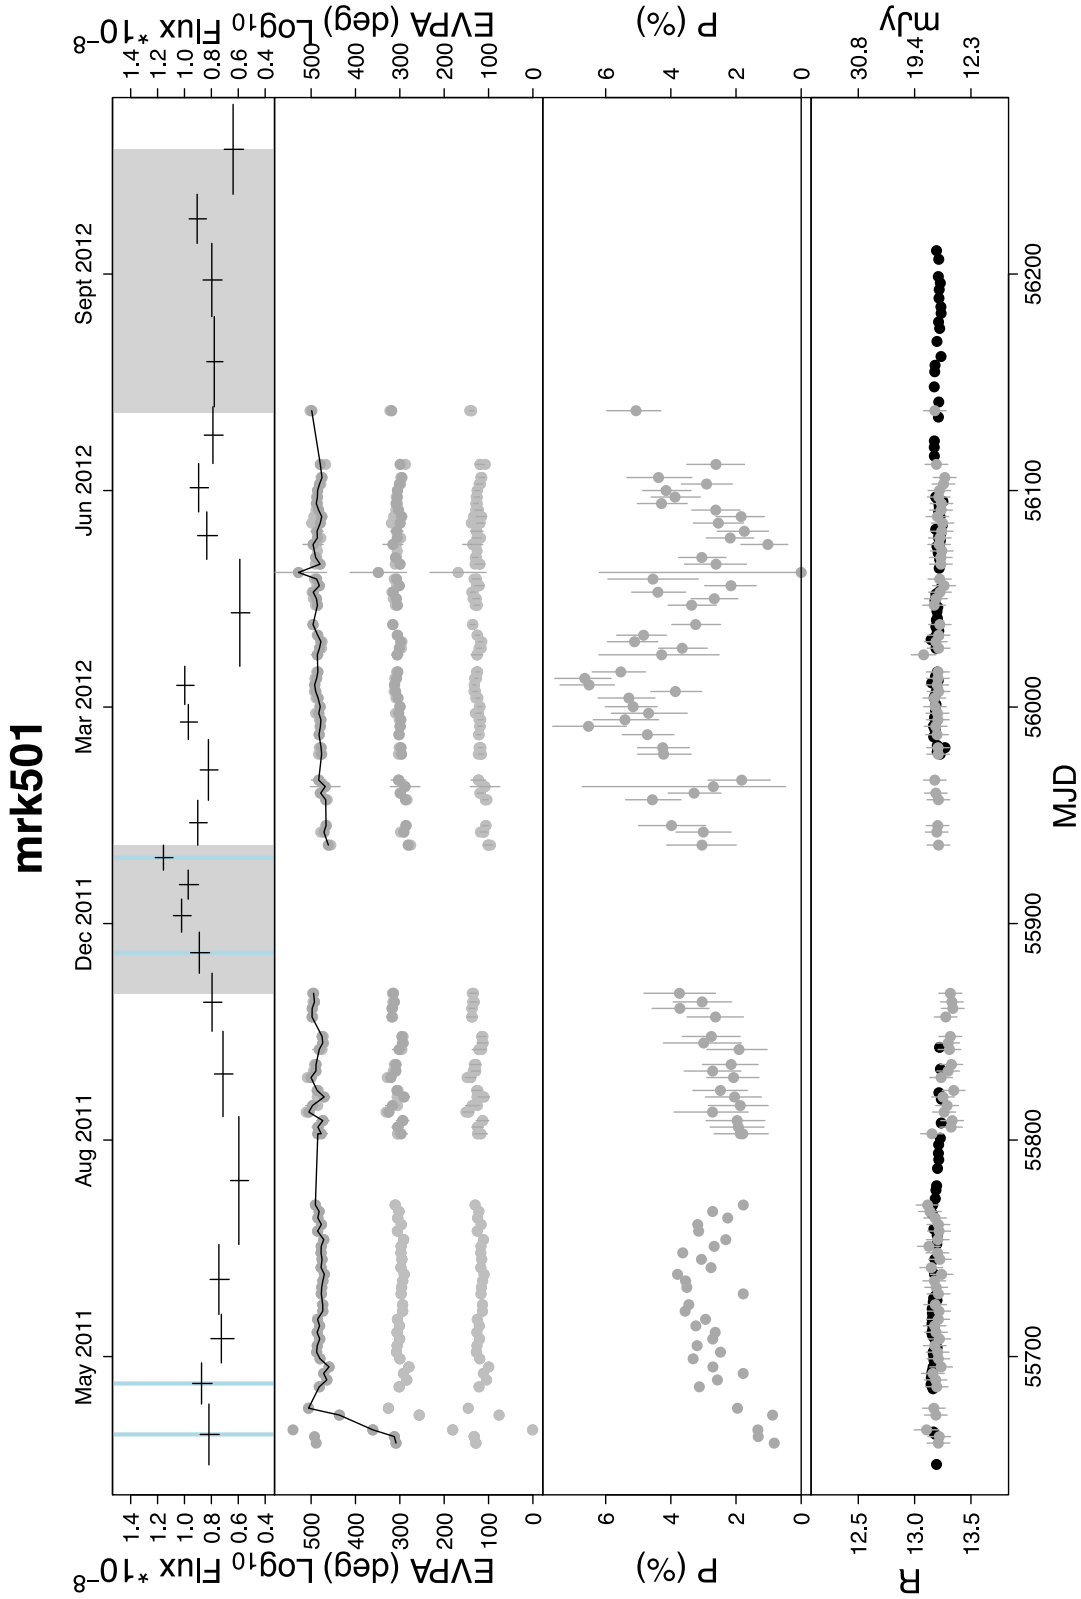

**Figure A9.** All  $\gamma$ -ray and optical data for Mrk 501. Top panel shows the *Fermi*  $\gamma$ -ray light curve. The errors on the x-axis represent the bins used for the *Fermi* data. Grey vertical sections show periods where no synchronous optical data are available. Flaring episodes are identified by vertical blue lines (see Section 2.3.1 for definition of a flare). The second panel shows the optical polarization angle or EVPA, the grey points are RINGO2 data, there are no KVA-DIPOL data for this source. The black line traces the temporally closest EVPA points, showing the most likely behaviour of the EVPA. There are no EVPA rotations (i.e.  $>90^\circ$ ). The third panel shows the optical degree of polarization (grey points are RINGO2 and no KVA-DIPOL data available). The fourth panel shows the optical magnitude (black points KVA-DIPOL, grey points RINGO2).

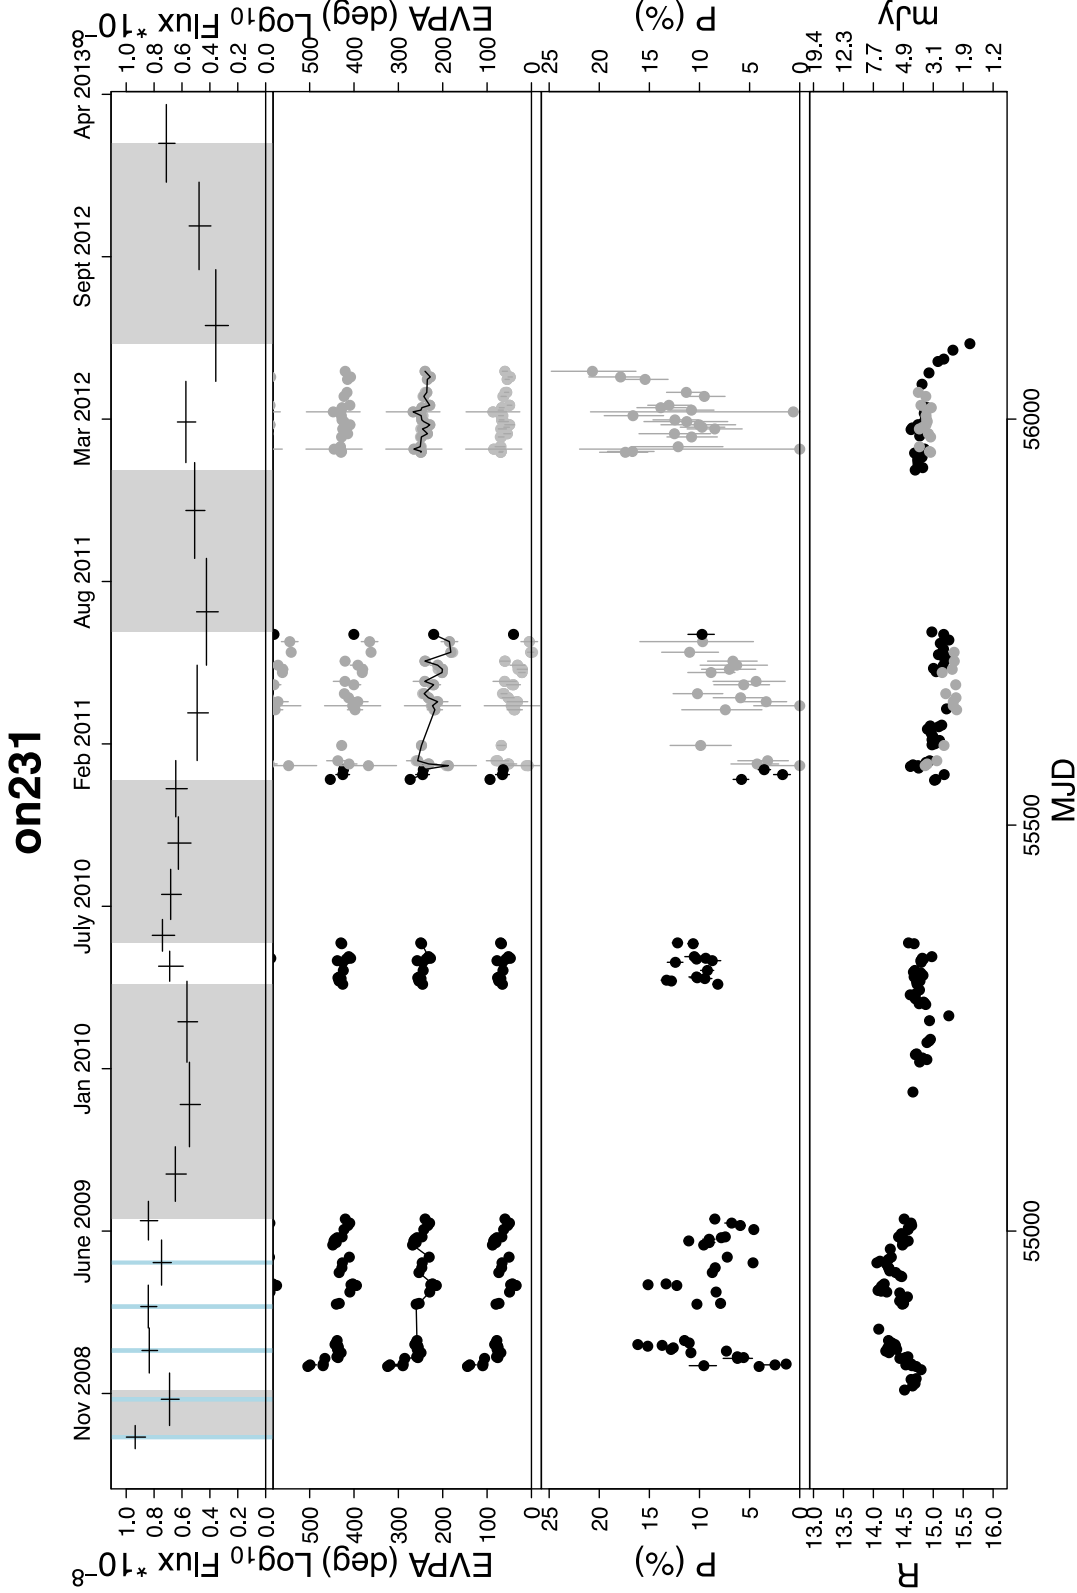

**Figure A10.** All  $\gamma$ -ray and optical data for ON 231. Top panel shows the *Fermi*  $\gamma$ -ray light curve. The errors on the x-axis represent the bins used for the *Fermi* data. Grey vertical sections show periods where no synchronous optical data available. There are no flaring episodes identified in ON 231 during this period of time. The second panel shows the optical polarization angle or EVPA, the grey points are RINGO2 data and the black points KVA-DIPOL data. The black line traces the temporally closest EVPA points, showing the most likely behaviour of the EVPA. The third panel shows the optical degree of polarization, and the fourth panel the optical magnitude, all point colours are the same as those for panel 2.

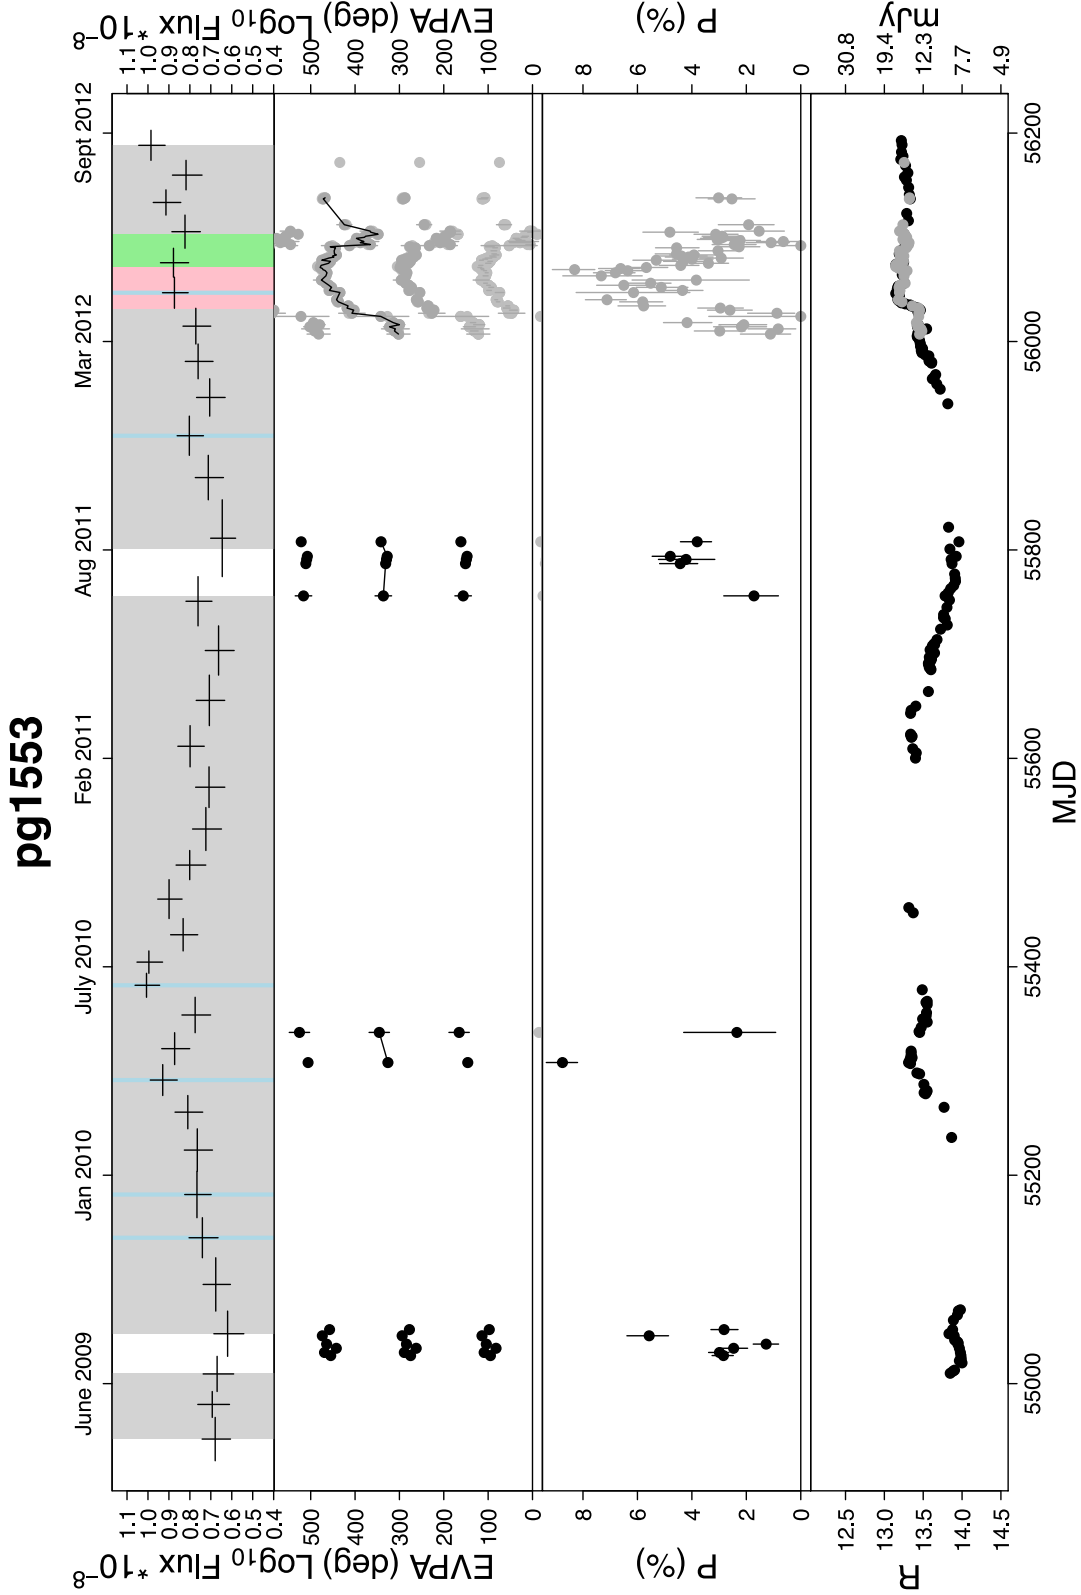

**Figure A11.** All  $\gamma$ -ray and optical data for PG 1553+113. Top panel shows the *Fermi*  $\gamma$ -ray light curve. The errors on the x-axis represent the bins used for the *Fermi* data. Grey vertical sections show periods where no synchronous optical data available, pink vertical sections highlight regions where optical polarization angle rotations occur in the upwards direction, light green sections show downwards rotations. Flaring episodes are identified by vertical blue lines (see Section 2.3.1 for definition of a flare). The second panel shows the optical polarization angle or EVPA, the grey points are RINGO2 data and the black points KVA-DIPOL data. The black line traces the temporally closest EVPA points, showing the most likely behaviour of the EVPA. The third panel shows the optical degree of polarization, and the fourth panel the optical magnitude, all point colours are the same as those for panel 2.

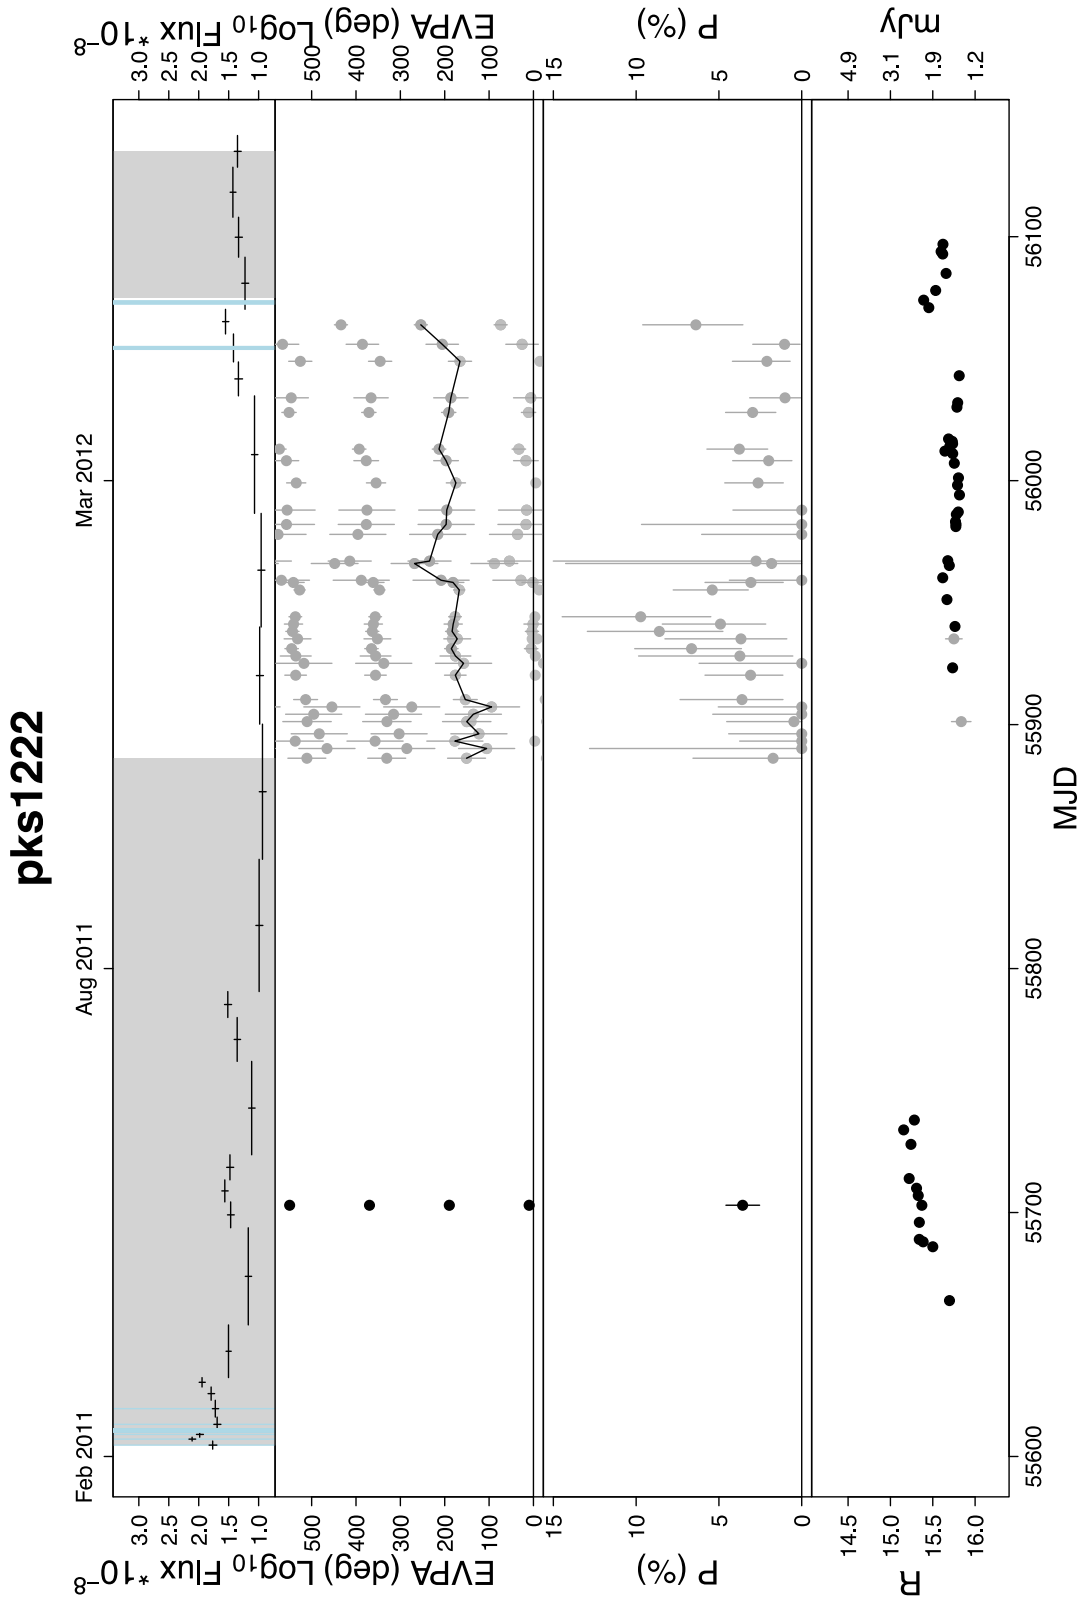

**Figure A12.** All  $\gamma$ -ray and optical data for PKS 1222+216. Top panel shows the *Fermi*  $\gamma$ -ray light curve. The errors on the x-axis represent the bins used for the *Fermi* data. Grey vertical sections show periods where no synchronous optical data available. Flaring episodes are identified by vertical blue lines (see Section 2.3.1 for definition of a flare). The second panel shows the optical polarization angle or EVPA, the grey points are RINGO2 data and the black point is KVA-DIPOL data. The black line traces the temporally closest EVPA points, showing the most likely behaviour of the EVPA. The third panel shows the optical degree of polarization, and the fourth panel the optical magnitude, all point colours are the same as those for panel 2.

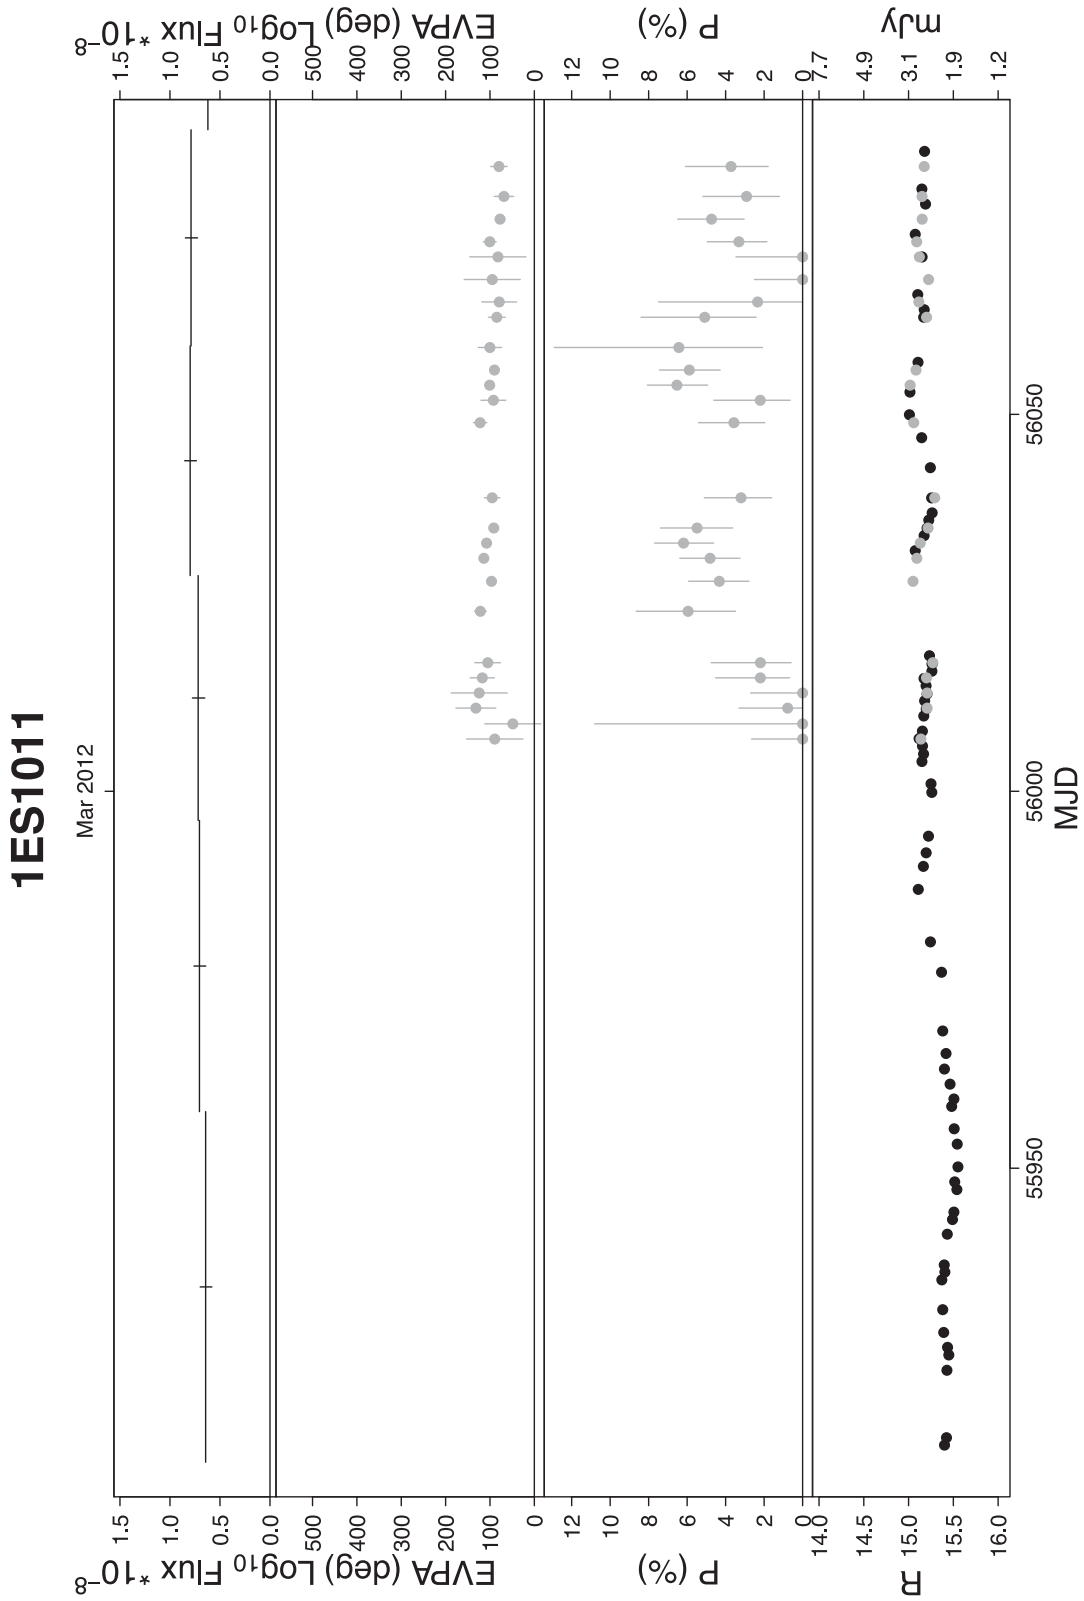

**Figure A13.** All  $\gamma$ -ray and optical data for IES 1011+496. Top panel shows the *Fermi*  $\gamma$ -ray light curve. The errors on the x-axis represent the bins used for the *Fermi* data which, due to the faintness of the source, are quite large. No flare analysis was performed on this source due to the lack of *Fermi* data. The second panel shows the optical polarization angle or EVPA, the grey points are RINGO2 data and no KVA-DIPOL data are available. The black line traces the temporally closest EVPA points, showing the most likely behaviour of the EVPA. The third panel shows the optical degree of polarization, and the fourth panel the optical magnitude, all point colours are the same as those for panel 2.

# 1ES1218

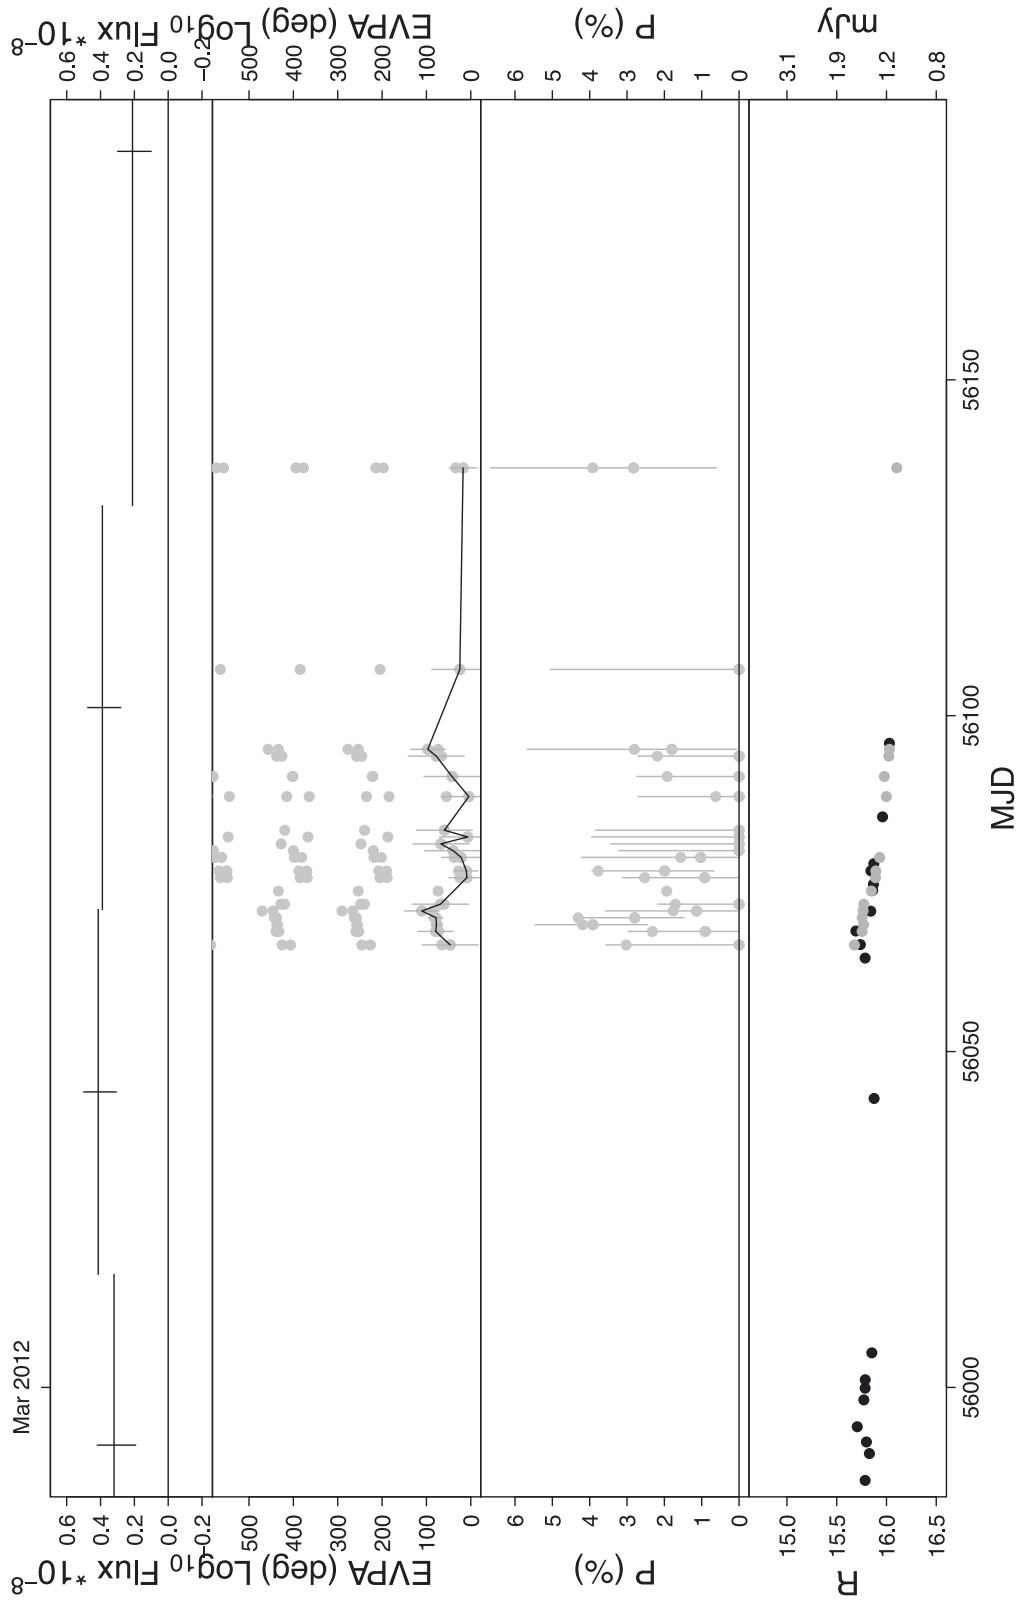

**Figure A14.** All  $\gamma$ -ray and optical data for IES 1218+304. Top panel shows the *Fermi*  $\gamma$ -ray light curve. The errors on the x-axis represent the bins used for the *Fermi* data which, due to the faintness of the source, are quite large. No flare analysis was performed on this source due to the lack of *Fermi* data. The second panel shows the optical polarization angle or EVPA, the grey points are RINGO2 data and no KVA-DIPOL data are available. The black line traces the temporally closest EVPA points, showing the most likely behaviour of the EVPA. The third panel shows the optical degree of polarization, and the fourth panel the optical magnitude, all point colours are the same as those for panel 2.



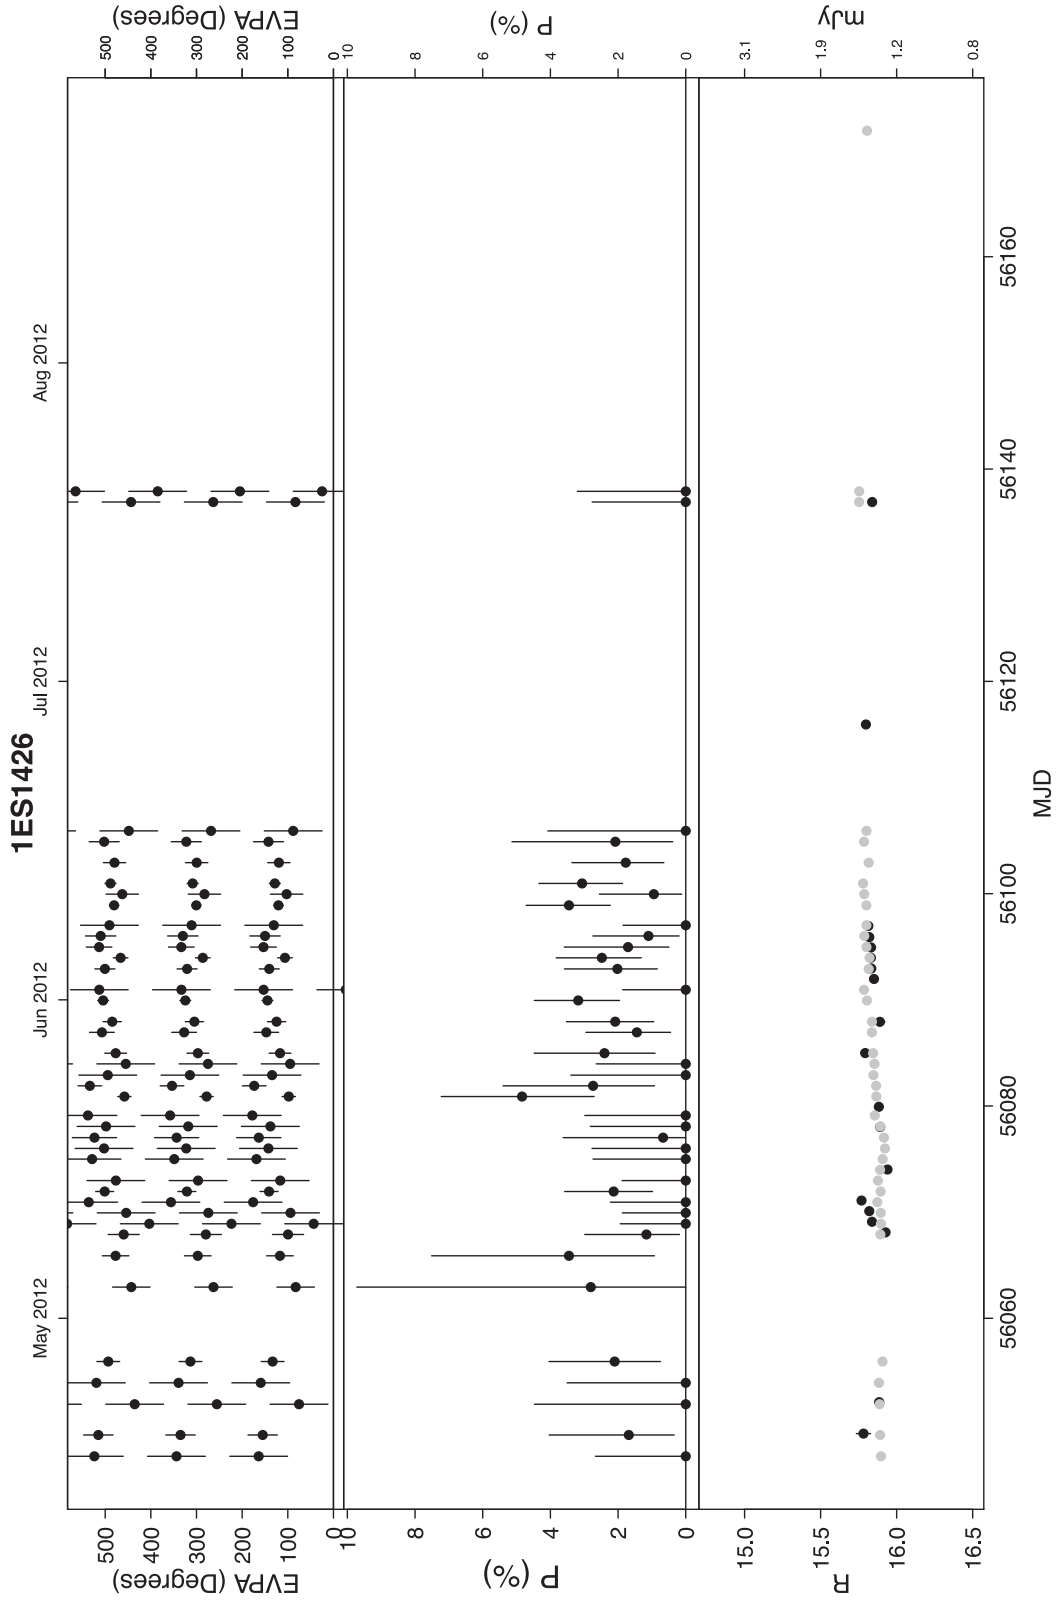

**Figure A15.** All optical data for IES 1426+428 (the source is too faint in *Fermi* data). Top panel shows the optical polarization angle or EVPA, the black points are KVA-DIPOL data and there are no polarization data points from RINGO2. The second panel shows the optical degree of polarization, and the third panel the optical magnitude, all point colours are the same as those for Fig. A7.

This paper has been typeset from a  $\text{\TeX}/\text{\LaTeX}$  file prepared by the author.
